# Supplementary material
Source: publisher site journal article supplement (https://www.spandidos-publications.com/6727/downloadSupplementary)
Supplement: Supplementary file 1 [file downloadSupplementary]

## Sheet: SuppTable 1_lncRNA
Table SI. lncRNAs expression profiles.
Transcript_ID	Gene_id	Symbol	Description	Database_source	A1	A2	A3	B1	B2	B3	G1	G2	G2_vs_G1_log2FoldChange	G2_vs_G1_Pvalue	G2_vs_G1_FDR
ENSOCUT00000009889	ENSOCUG00000009879	STAG2	stromal antigen 2	ProteinCodingRNA	12.6856	12.5649	12.3619	12.7449	12.3842	12.238	12.5375	12.4557	-0.0817628	0.685107	0.986021
ENSOCUT00000016388	ENSOCUG00000016386	MBTPS2	membrane bound transcription factor peptidase, site 2	ProteinCodingRNA	9.07473	9.04641	8.89253	9.07585	9.22432	8.99945	9.00456	9.09988	0.0953198	0.44474	0.986021
MSTRG.348.2	---	---	---	Predicted_LncRNA	11.4674	11.252	11.113	11.4371	11.4706	11.2392	11.2774	11.3823	0.104862	0.464278	0.986021
ENSOCUT00000007672	ENSOCUG00000007675	NETO1	neuropilin and tolloid like 1	ProteinCodingRNA	0	0.999643	0	0	0	0	0.333214	0	-0.333214	0.820752	0.986021
MSTRG.8238.1	---	---	---	Predicted_LncRNA	4.35286	5.39162	5.83769	5.48308	6.71761	5.69984	5.19406	5.96685	0.772789	0.151818	0.884032
ENSOCUT00000001902	ENSOCUG00000001902	SEC22A	SEC22 homolog A, vesicle trafficking protein	ProteinCodingRNA	8.47521	8.79695	8.4625	8.64926	8.51714	8.60532	8.57822	8.59057	0.0123525	0.973283	0.999819
MSTRG.963.1	---	---	---	Predicted_LncRNA	6.666	6.83218	5.9729	6.01353	5.71745	5.61235	6.49036	5.78111	-0.709251	0.0213458	0.453941
MSTRG.12707.1	---	---	---	Predicted_LncRNA	6.79234	7.72721	7.48027	7.24847	7.35708	7.27571	7.33328	7.29375	-0.0395207	0.759533	0.986021
MSTRG.10230.1	---	---	---	Predicted_LncRNA	7.08946	6.40869	6.41422	6.53028	6.61707	6.41995	6.63746	6.52244	-0.115021	0.582429	0.986021
ENSOCUT00000006057	ENSOCUG00000006056	MAP3K8	mitogen-activated protein kinase kinase kinase 8	ProteinCodingRNA	8.07966	8.32572	8.15645	8.21506	8.54085	8.33166	8.18727	8.36252	0.175249	0.263749	0.970468
MSTRG.2167.1	---	---	---	Predicted_LncRNA	3.85986	4.69975	4.40793	2.31475	2.01302	0	4.32251	1.44259	-2.87992	0.000256039	0.0391629
ENSOCUT00000000945	ENSOCUG00000000945	SRSF12	serine and arginine rich splicing factor 12	ProteinCodingRNA	4.67259	5.12859	5.11745	5.82407	5.82439	5.27516	4.97288	5.64121	0.668331	0.0430984	0.606419
ENSOCUT00000000946	ENSOCUG00000000947	PM20D2	peptidase M20 domain containing 2	ProteinCodingRNA	5.46242	4.99931	5.59095	5.31318	4.40884	4.67071	5.35089	4.79758	-0.55332	0.188565	0.922687
ENSOCUT00000006016	ENSOCUG00000006016	SMS	spermine synthase	ProteinCodingRNA	10.7069	10.415	10.0231	10.9129	10.2084	10.0886	10.3817	10.4033	0.0216374	0.880524	0.993824
ENSOCUT00000033461	ENSOCUG00000029227	---	---	ProteinCodingRNA	1.82162	2.32136	2.1281	2.99215	2.82223	0	2.09036	1.93813	-0.152232	0.738647	0.986021
ENSOCUT00000000949	ENSOCUG00000000948	GABRR1	gamma-aminobutyric acid type A receptor rho1 subunit	ProteinCodingRNA	1.82162	0	3.14838	2.57749	3.71645	3.83334	1.65667	3.37576	1.71909	0.153202	0.884565
ENSOCUT00000006395	ENSOCUG00000006386	ATP10A	ATPase phospholipid transporting 10A (putative)	ProteinCodingRNA	9.37562	9.26373	9.43726	9.48289	9.19722	9.16234	9.35887	9.28082	-0.0780538	0.604277	0.986021
MSTRG.15240.1	---	---	---	Predicted_LncRNA	8.64924	8.89411	8.42526	8.44638	8.58715	8.77609	8.6562	8.60321	-0.0529951	0.742311	0.986021
ENSOCUT00000001240	ENSOCUG00000001241	MFSD4A	major facilitator superfamily domain containing 4A	ProteinCodingRNA	6.54067	6.84478	6.88112	5.69164	6.6896	7.1977	6.75552	6.52631	-0.229213	0.786445	0.986021
ENSOCUT00000015696	ENSOCUG00000015700	TRIM26	tripartite motif containing 26	ProteinCodingRNA	9.36457	9.35464	9.60279	9.58723	9.28644	9.05305	9.44067	9.3089	-0.131761	0.513129	0.986021
ENSOCUT00000015697	ENSOCUG00000015697	ZPLD1	zona pellucida like domain containing 1	ProteinCodingRNA	3.68134	0	5.83769	3.57674	2.33582	6.21741	3.17301	4.04332	0.870311	0.799907	0.986021
ENSOCUT00000015695	ENSOCUG00000015689	PRPF19	pre-mRNA processing factor 19	ProteinCodingRNA	10.8485	10.6664	10.5851	10.9705	10.454	10.5077	10.7	10.6441	-0.0559028	0.820327	0.986021
ENSOCUT00000015693	ENSOCUG00000015696	IL20RA	interleukin 20 receptor subunit alpha	ProteinCodingRNA	9.84195	10.7023	11.5037	10.215	12.3466	11.9029	10.6827	11.4882	0.805516	0.216985	0.94854
ENSOCUT00000001145	ENSOCUG00000022150	---	---	ProteinCodingRNA	9.6337	9.76416	9.87383	9.77894	10.4193	10.449	9.75723	10.2157	0.458493	0.0219255	0.456983
ENSOCUT00000015520	ENSOCUG00000015523	JHY	junctional cadherin complex regulator	ProteinCodingRNA	0	2.32136	0	0	4.54015	4.19635	0.773786	2.91217	2.13838	0.0991995	0.795344
ENSOCUT00000015521	ENSOCUG00000015530	SMCO4	single-pass membrane protein with coiled-coil domains 4	ProteinCodingRNA	6.86734	6.67172	6.88112	6.84908	6.78537	6.78259	6.80673	6.80568	-0.00104585	0.983712	0.999819
ENSOCUT00000015522	ENSOCUG00000015529	LELP1	late cornified envelope like proline rich 1	ProteinCodingRNA	0	0	0	1.57899	0	0	0	0.526329	0.526329	0.642233	0.986021
ENSOCUT00000015523	ENSOCUG00000015528	C16orf72	chromosome 16 open reading frame 72	ProteinCodingRNA	10.9036	10.9248	10.7848	11.1015	10.7367	10.9144	10.8711	10.9175	0.046458	0.683783	0.986021
ENSOCUT00000015526	ENSOCUG00000015520	PHF3	PHD finger protein 3	ProteinCodingRNA	12.3931	12.591	12.6552	12.4657	12.767	12.6986	12.5465	12.6438	0.0973354	0.459119	0.986021
ENSOCUT00000015527	ENSOCUG00000015527	PYGL	glycogen phosphorylase L	ProteinCodingRNA	9.79058	9.45872	9.24758	9.51656	8.80846	9.43943	9.49896	9.25482	-0.24414	0.355454	0.986021
MSTRG.9068.1	---	---	---	Predicted_LncRNA	1.82162	4.32125	3.74004	4.89822	3.60086	3.61062	3.29431	4.03657	0.74226	0.468873	0.986021
ENSOCUT00000001900	ENSOCUG00000001901	---	---	ProteinCodingRNA	0	0	0	2.31475	0	2.34434	0	1.55303	1.55303	0.171927	0.910728
MSTRG.7481.1	---	---	---	Predicted_LncRNA	9.98954	10.1311	9.82283	10.4556	9.8311	9.94082	9.98117	10.0758	0.0946631	0.574792	0.986021
ENSOCUT00000010826	ENSOCUG00000010826	VSIG1	V-set and immunoglobulin domain containing 1	ProteinCodingRNA	1.82162	0	0	1.57899	2.82223	3.0245	0.607208	2.47524	1.86803	0.102922	0.802489
ENSOCUT00000010827	ENSOCUG00000010829	MYL4	myosin light chain 4	ProteinCodingRNA	0	3.45878	3.14838	2.57749	1.59655	3.48487	2.20239	2.55297	0.350581	0.973761	0.999819
ENSOCUT00000016725	ENSOCUG00000016734	PAQR9	progestin and adipoQ receptor family member 9	ProteinCodingRNA	0	0	2.1281	0	3.33754	2.02102	0.709366	1.78619	1.07682	0.398006	0.986021
ENSOCUT00000007300	ENSOCUG00000007303	---	---	ProteinCodingRNA	3.24021	3.32129	4.06464	2.99215	5.54053	5.61235	3.54205	4.71501	1.17296	0.0398271	0.586607
ENSOCUT00000010822	ENSOCUG00000010828	P2RY1	purinergic receptor P2Y1	ProteinCodingRNA	8.25748	9.09469	9.46505	8.53021	9.71776	9.32254	8.93907	9.19017	0.251097	0.528329	0.986021
ENSOCUT00000010820	ENSOCUG00000010821	SLC1A4	solute carrier family 1 member 4	ProteinCodingRNA	10.5915	10.2812	10.6154	10.6519	11.2109	10.4636	10.496	10.7755	0.279432	0.179539	0.914954
ENSOCUT00000007307	ENSOCUG00000007307	---	---	ProteinCodingRNA	0	1.58449	0	2.57749	2.01302	3.0245	0.528162	2.53834	2.01017	0.0511252	0.642819
ENSOCUT00000001181	ENSOCUG00000001183	SH3GL2	SH3 domain containing GRB2 like 2, endophilin A1	ProteinCodingRNA	8.85014	8.87273	9.07795	8.57225	7.61716	7.06117	8.93361	7.7502	-1.18341	0.00569689	0.24958
ENSOCUT00000000466	ENSOCUG00000000466	MIOS	meiosis regulator for oocyte development	ProteinCodingRNA	11.501	11.161	10.8031	11.3563	10.8494	10.8093	11.155	11.005	-0.150042	0.515951	0.986021
ENSOCUT00000011995	ENSOCUG00000011993	RNF214	ring finger protein 214	ProteinCodingRNA	9.93455	9.92707	10.1668	10.0612	10.0699	9.93031	10.0095	10.0205	0.0109724	0.937686	0.999819
ENSOCUT00000021508	ENSOCUG00000022374	---	---	ProteinCodingRNA	0	0	3.32054	3.99159	3.4752	3.83334	1.10685	3.76671	2.65986	0.13586	0.866024
ENSOCUT00000024759	ENSOCUG00000027938	SAP25	Sin3A associated protein 25	ProteinCodingRNA	4.09201	3.69978	3.32054	3.99159	5.26481	4.93393	3.70411	4.73011	1.026	0.039433	0.58647
ENSOCUT00000031073	ENSOCUG00000023050	---	---	OtherNonCodingRNA	0	0	0	1.57899	0	0	0	0.526329	0.526329	0.642233	0.986021
ENSOCUT00000011991	ENSOCUG00000011991	PANK3	pantothenate kinase 3	ProteinCodingRNA	10.0086	9.79533	9.73803	9.93061	9.86751	9.84171	9.84732	9.87994	0.0326241	0.815436	0.986021
ENSOCUT00000011992	ENSOCUG00000011995	TBC1D7	TBC1 domain family member 7	ProteinCodingRNA	9.06566	8.75083	8.59838	8.94815	8.54867	8.48732	8.80496	8.66138	-0.143578	0.490977	0.986021
MSTRG.12815.1	---	---	---	Predicted_LncRNA	6.18624	5.67173	5.77985	5.31318	5.66085	5.78234	5.87927	5.58546	-0.293817	0.314949	0.986021
ENSOCUT00000024752	ENSOCUG00000027945	TICAM2	TIR domain-containing adapter molecule 2	ProteinCodingRNA	4.76515	5.20876	4.62058	4.74625	5.54053	4.83433	4.86483	5.04037	0.175538	0.623046	0.986021
ENSOCUT00000033220	ENSOCUG00000017808	NIM1K	NIM1 serine/threonine protein kinase	ProteinCodingRNA	9.21055	8.71353	7.26526	9.31747	5.92394	6.62759	8.39645	7.28967	-1.10678	0.612718	0.986021
ENSOCUT00000024750	ENSOCUG00000027437	---	---	ProteinCodingRNA	3.77336	2.32136	2.45817	1.57899	3.18535	2.6083	2.85096	2.45755	-0.393417	0.584277	0.986021
ENSOCUT00000021505	ENSOCUG00000024595	COLEC10	collectin subfamily member 10	ProteinCodingRNA	3.68134	3.80669	3.74004	3.89852	0	4.02623	3.74269	2.64158	-1.10111	0.739992	0.986021
ENSOCUT00000011998	ENSOCUG00000012000	---	---	ProteinCodingRNA	11.6258	11.5544	11.4263	11.5858	11.4086	11.3739	11.5355	11.4561	-0.0793807	0.466454	0.986021
ENSOCUT00000024754	ENSOCUG00000023165	---	---	ProteinCodingRNA	1.42753	2.99938	2.45817	0	3.71645	3.19481	2.29503	2.30375	0.00872675	0.62347	0.986021
ENSOCUT00000013597	ENSOCUG00000001324	ATP1A1	sodium/potassium-transporting ATPase subunit alpha-1	ProteinCodingRNA	13.1803	12.9773	12.8835	13.135	13.4259	13.0543	13.0137	13.2051	0.191412	0.206093	0.938709
ENSOCUT00000013596	ENSOCUG00000013593	BPI	bactericidal/permeability-increasing protein	ProteinCodingRNA	2.38533	2.58437	0	0	0	0	1.65657	0	-1.65657	0.138453	0.868355
MSTRG.12088.1	---	---	---	Predicted_LncRNA	7.01602	6.18912	6.76666	6.67761	6.71761	6.74194	6.65727	6.71239	0.0551235	0.96334	0.999819
ENSOCUT00000013594	ENSOCUG00000013594	STX12	syntaxin 12	ProteinCodingRNA	6.06403	5.67173	5.77985	6.23907	5.33884	4.67071	5.83854	5.41621	-0.422329	0.528811	0.986021
MSTRG.17492.1	---	---	---	Predicted_LncRNA	10.0757	9.85882	10.2584	10.233	11.4155	10.8077	10.0643	10.8187	0.754466	0.00639651	0.263659
ENSOCUT00000013592	ENSOCUG00000013586	STIL	STIL, centriolar assembly protein	ProteinCodingRNA	8.2851	7.383	7.24402	7.90395	5.66085	6.07194	7.63737	6.54558	-1.09179	0.185828	0.919529
MSTRG.17492.3	---	---	---	Predicted_LncRNA	8.08416	0	0	0.99552	1.0087	3.93301	2.69472	1.97907	-0.715645	0.198654	0.933285
ENSOCUT00000013590	ENSOCUG00000013592	RWDD1	RWD domain containing 1	ProteinCodingRNA	9.01472	8.86347	8.92291	8.90991	8.9802	9.06133	8.9337	8.98381	0.0501126	0.662347	0.986021
MSTRG.7776.1	---	---	---	Predicted_LncRNA	2.78963	3.58431	2.45817	2.79967	4.54015	4.34851	2.94404	3.89611	0.952072	0.123737	0.840679
ENSOCUT00000013279	ENSOCUG00000013272	SEC24D	SEC24 homolog D, COPII coat complex component	ProteinCodingRNA	11.3207	11.5125	11.8474	11.2874	11.6458	12.1872	11.5602	11.7068	0.146595	0.500766	0.986021
ENSOCUT00000023901	ENSOCUG00000002037	PTPN21	protein tyrosine phosphatase, non-receptor type 21	ProteinCodingRNA	11.7552	11.8479	11.9378	11.7262	12.5592	12.3275	11.847	12.2043	0.357297	0.0790763	0.741571
ENSOCUT00000008657	ENSOCUG00000008656	---	---	ProteinCodingRNA	6.11768	6.95349	7.23329	6.54571	6.22656	6.47059	6.76815	6.41429	-0.353867	0.231576	0.952743
MSTRG.3760.1	---	---	---	Predicted_LncRNA	10.582	10.0559	9.13385	10.6484	8.31191	6.70012	9.92393	8.55346	-1.37047	0.552467	0.986021
MSTRG.10852.1	---	---	---	Predicted_LncRNA	0	0	2.1281	0	0	4.41896	0.709366	1.47299	0.763621	0.376609	0.986021
ENSOCUT00000017947	ENSOCUG00000017945	RIMS1	regulating synaptic membrane exocytosis 1	ProteinCodingRNA	5.31711	5.85728	5.44971	5.63506	3.92308	5.41962	5.54137	4.99259	-0.54878	0.433411	0.986021
MSTRG.11063.1	---	---	---	Predicted_LncRNA	10.3231	7.11823	6.2954	8.21022	5.50881	5.31265	7.91225	6.3439	-1.56836	0.151417	0.883746
ENSOCUT00000008652	ENSOCUG00000022682	---	---	OtherNonCodingRNA	2.78963	4.16925	4.15842	3.89852	3.60086	3.48487	3.70577	3.66142	-0.0443469	0.799597	0.986021
MSTRG.7329.2	---	---	---	Predicted_LncRNA	7.39486	7.30307	7.81145	7.63493	7.33011	7.23723	7.50313	7.40076	-0.102369	0.642228	0.986021
ENSOCUT00000033118	ENSOCUG00000029093	---	---	OtherNonCodingRNA	8.76584	9.18416	9.13385	8.79518	9.76215	9.85289	9.02795	9.47007	0.44212	0.0973254	0.790475
ENSOCUT00000030782	ENSOCUG00000029749	---	---	ProteinCodingRNA	0	1.58449	0	0	2.33582	0	0.528162	0.778605	0.250443	0.765608	0.986021
MSTRG.6816.1	---	---	---	Predicted_LncRNA	10.1569	10.0478	9.82997	10.0231	10.607	10.2675	10.0116	10.2992	0.287648	0.115378	0.824207
ENSOCUT00000033368	ENSOCUG00000007788	TTC7A	tetratricopeptide repeat domain 7A	ProteinCodingRNA	10.2257	10.287	10.3269	10.3062	11.074	10.777	10.2799	10.719	0.439186	0.0242259	0.475593
ENSOCUT00000033369	ENSOCUG00000029606	---	---	ProteinCodingRNA	8.04315	7.98797	8.03189	8.1048	8.62092	8.29934	8.02101	8.34169	0.32068	0.0670525	0.708584
MSTRG.10618.1	---	---	---	Predicted_LncRNA	7.29748	6.44224	6.9218	7.03549	7.10468	6.6859	6.88717	6.94202	0.0548464	0.941201	0.999819
ENSOCUT00000033363	ENSOCUG00000001911	VGLL4	vestigial like family member 4	ProteinCodingRNA	7.65888	7.734	7.58531	8.07852	7.5871	6.86061	7.6594	7.50875	-0.15065	0.834168	0.987758
ENSOCUT00000033360	ENSOCUG00000029483	FAM19A2	family with sequence similarity 19 member A2, C-C motif chemokine like	ProteinCodingRNA	4.71961	4.16925	0	4.89822	0	0	2.96296	1.63274	-1.33022	0.871142	0.993003
ENSOCUT00000033361	ENSOCUG00000029359	---	---	ProteinCodingRNA	10.108	9.78392	9.53447	10.3364	9.37266	9.84811	9.80881	9.8524	0.0435927	0.784275	0.986021
ENSOCUT00000033366	ENSOCUG00000009290	PLEKHG7	pleckstrin homology and RhoGEF domain containing G7	ProteinCodingRNA	2.6016	1.58449	3.85655	4.51498	5.47638	5.58196	2.68088	5.19111	2.51023	0.000522574	0.0596286
ENSOCUT00000031839	ENSOCUG00000024317	PURB	purine rich element binding protein B	ProteinCodingRNA	0	1.58449	0	7.90395	1.59655	2.02102	0.528162	3.84051	3.31234	0.00741902	0.287524
ENSOCUT00000033364	ENSOCUG00000029501	---	---	ProteinCodingRNA	11.379	11.4674	11.5087	11.3844	11.5365	11.4149	11.4517	11.4453	-0.00646055	0.949129	0.999819
MSTRG.9311.2	---	---	---	Predicted_LncRNA	10.4713	12.6041	12.5566	12.7666	12.6263	10.318	11.8773	11.9036	0.0262868	0.917481	0.999819
MSTRG.7407.1	---	---	---	Predicted_LncRNA	5.84825	5.0437	4.91738	5.51478	5.92394	6.27553	5.26978	5.90475	0.634973	0.136791	0.867214
ENSOCUT00000001374	ENSOCUG00000001375	---	---	ProteinCodingRNA	12.2842	13.2539	13.3344	11.3688	12.2664	12.7698	12.9575	12.135	-0.82245	0.0509841	0.642819
ENSOCUT00000008086	ENSOCUG00000008083	YLPM1	YLP motif containing 1	ProteinCodingRNA	11.2732	11.2899	11.2814	11.4678	11.3973	11.2374	11.2815	11.3675	0.0859863	0.340657	0.986021
ENSOCUT00000033110	ENSOCUG00000029085	---	---	OtherNonCodingRNA	5.59443	5.64316	6.02363	5.89807	5.89969	5.69984	5.75374	5.83253	0.0787964	0.779772	0.986021
ENSOCUT00000019073	ENSOCUG00000019073	RF00003	---	OtherNonCodingRNA	0	0	1.08665	0	1.0087	1.01405	0.362216	0.674248	0.312032	0.743551	0.986021
ENSOCUT00000011258	ENSOCUG00000011244	ESPL1	extra spindle pole bodies like 1, separase	ProteinCodingRNA	9.52042	8.84791	8.2971	9.28106	7.68968	7.97622	8.88848	8.31565	-0.572825	0.318714	0.986021
ENSOCUT00000007246	ENSOCUG00000007245	SIRT5	sirtuin 5	ProteinCodingRNA	10.3919	10.2974	10.4186	10.1647	10.2593	10.1726	10.3693	10.1989	-0.17039	0.0450604	0.620478
ENSOCUT00000000567	ENSOCUG00000000568	HBB2	---	ProteinCodingRNA	13.1468	13.6449	15.0904	12.6546	12.3398	11.7614	13.9607	12.2519	-1.70879	0.000118265	0.0225632
ENSOCUT00000000564	ENSOCUG00000000564	CPNE2	copine 2	ProteinCodingRNA	9.39929	9.69452	9.97234	9.36173	9.69151	9.8513	9.68871	9.63485	-0.0538682	0.783713	0.986021
ENSOCUT00000000562	ENSOCUG00000000557	NLRC5	NLR family CARD domain containing 5	ProteinCodingRNA	7.59095	9.68929	10.5924	9.22226	9.05073	9.46255	9.29089	9.24518	-0.0457113	0.416432	0.986021
ENSOCUT00000007715	ENSOCUG00000007710	SCTR	secretin receptor precursor	ProteinCodingRNA	3.94146	4.08679	4.24647	4.45087	5.06121	4.83433	4.09157	4.78214	0.69056	0.0744235	0.735859
ENSOCUT00000007240	ENSOCUG00000007239	NDUFAF7	NADH:ubiquinone oxidoreductase complex assembly factor 7	ProteinCodingRNA	8.27333	8.23291	7.88188	8.31298	8.1872	8.12062	8.12937	8.20693	0.0775651	0.694124	0.986021
ENSOCUT00000007241	ENSOCUG00000007241	IPPK	inositol-pentakisphosphate 2-kinase	ProteinCodingRNA	9.89285	9.87273	9.82283	10.1242	9.95101	10.1007	9.8628	10.0586	0.195841	0.0373364	0.575552
ENSOCUT00000012972	ENSOCUG00000012976	---	---	ProteinCodingRNA	5.43451	5.20876	5.52206	4.63524	4.87473	5.0271	5.38844	4.84569	-0.542754	0.0902244	0.767206
ENSOCUT00000012973	ENSOCUG00000012973	OR1P1	olfactory receptor family 1 subfamily P member 1 (gene/pseudogene)	ProteinCodingRNA	0	0	0	1.99327	0	1.60366	0	1.19898	1.19898	0.321554	0.986021
ENSOCUT00000012970	ENSOCUG00000012948	DOCK7	dedicator of cytokinesis 7	ProteinCodingRNA	12.1145	12.216	12.1938	12.2297	12.1492	12.2486	12.1748	12.2092	0.0343963	0.638548	0.986021
ENSOCUT00000016896	ENSOCUG00000016897	SLC22A17	solute carrier family 22 member 17	ProteinCodingRNA	8.41933	8.52285	8.80461	8.33978	8.68618	9.30869	8.58227	8.77822	0.195952	0.389453	0.986021
ENSOCUT00000007248	ENSOCUG00000007246	DLL3	delta like canonical Notch ligand 3	ProteinCodingRNA	0	0	0	0	0	2.83136	0	0.943785	0.943785	0.376317	0.986021
ENSOCUT00000012975	ENSOCUG00000012977	C11orf52	chromosome 11 open reading frame 52	ProteinCodingRNA	5.22234	4.24725	4.40793	4.74625	5.82439	4.41896	4.62584	4.99653	0.370693	0.4319	0.986021
ENSOCUT00000011330	ENSOCUG00000011330	SKAP2	src kinase associated phosphoprotein 2	ProteinCodingRNA	7.8559	8.17422	8.444	8.17097	8.52112	8.47909	8.15804	8.39039	0.232355	0.295988	0.983011
ENSOCUT00000008771	ENSOCUG00000008771	IL1A	Interleukin-1 alpha	ProteinCodingRNA	5.98925	6.52286	6.62601	6.43407	6.16684	7.27571	6.37937	6.62554	0.24617	0.43018	0.986021
MSTRG.15035.1	---	---	---	Predicted_LncRNA	8.53229	8.625	8.35767	8.61676	8.88149	8.57478	8.50499	8.69101	0.186024	0.229169	0.952191
ENSOCUT00000011337	ENSOCUG00000011339	SC5D	sterol-C5-desaturase	ProteinCodingRNA	9.39205	9.13115	8.85099	9.40678	9.1206	9.44155	9.12473	9.32298	0.198247	0.326657	0.986021
ENSOCUT00000011336	ENSOCUG00000011338	TRIM25	tripartite motif containing 25	ProteinCodingRNA	7.69462	8.34802	8.33274	8.42568	8.26995	8.28526	8.12513	8.32696	0.201837	0.433121	0.986021
ENSOCUT00000011339	ENSOCUG00000011340	CDC20	cell division cycle 20	ProteinCodingRNA	9.73444	9.15411	8.55162	9.88888	7.60221	7.47075	9.14672	8.32061	-0.826109	0.488481	0.986021
ENSOCUT00000003053	ENSOCUG00000003053	BBS7	Bardet-Biedl syndrome 7	ProteinCodingRNA	9.09493	9.3167	8.92291	9.22466	9.33472	9.15977	9.11151	9.23972	0.128205	0.415125	0.986021
ENSOCUT00000008779	ENSOCUG00000008778	---	---	ProteinCodingRNA	7.8023	7.5992	7.48932	7.61312	7.94801	7.59006	7.63027	7.71706	0.0867881	0.647665	0.986021
ENSOCUT00000008778	ENSOCUG00000008775	AUTS2	AUTS2, activator of transcription and developmental regulator	ProteinCodingRNA	9.13234	9.40868	10.1369	9.15091	10.4499	10.2747	9.5593	9.95849	0.399183	0.264156	0.970468
ENSOCUT00000002576	ENSOCUG00000002576	GABRA2	gamma-aminobutyric acid type A receptor alpha2 subunit	ProteinCodingRNA	0	0	0	0	0	3.34712	0	1.11571	1.11571	0.299901	0.983233
ENSOCUT00000003840	ENSOCUG00000003841	RNF182	ring finger protein 182	ProteinCodingRNA	4.0187	3.58431	3.32054	3.99159	0	1.01405	3.64118	1.66855	-1.97264	0.38084	0.986021
ENSOCUT00000007599	ENSOCUG00000007600	---	---	ProteinCodingRNA	10.5716	10.4515	10.3419	10.6113	10.4499	10.6427	10.455	10.5679	0.112896	0.320287	0.986021
ENSOCUT00000002575	ENSOCUG00000002573	UBAP2	ubiquitin associated protein 2	ProteinCodingRNA	11.6844	11.7391	11.5569	11.8926	11.5608	11.5047	11.6601	11.6527	-0.0073771	0.994719	0.999819
ENSOCUT00000003513	ENSOCUG00000003513	SLC22A4	solute carrier family 22 member 4	ProteinCodingRNA	7.88197	8.43392	9.33302	7.9218	10.3142	9.90138	8.54964	9.37914	0.829504	0.083388	0.755177
ENSOCUT00000029924	ENSOCUG00000026723	RF00001	---	OtherNonCodingRNA	0	0.999643	0	1.57899	0	0	0.333214	0.526329	0.193114	0.816678	0.986021
ENSOCUT00000034092	ENSOCUG00000025115	MPHOSPH10	M-phase phosphoprotein 10	ProteinCodingRNA	9.2023	9.2257	9.02913	9.17095	9.17213	8.95864	9.15238	9.10057	-0.0518027	0.681776	0.986021
ENSOCUT00000004445	ENSOCUG00000004445	---	---	ProteinCodingRNA	6.96814	6.56915	6.47015	6.56098	6.8116	6.76917	6.66915	6.71392	0.0447663	0.911612	0.999819
ENSOCUT00000004444	ENSOCUG00000004444	CHST9	carbohydrate sulfotransferase 9	ProteinCodingRNA	3.47757	3.32129	4.40793	3.45128	4.54015	5.3492	3.73559	4.44688	0.711282	0.196999	0.931103
ENSOCUT00000026845	ENSOCUG00000024824	RF00001	---	OtherNonCodingRNA	0.883565	0.999643	1.08665	0.99552	1.0087	1.01405	0.989953	1.00609	0.0161357	0.981615	0.999819
ENSOCUT00000001166	ENSOCUG00000001164	KDM1A	lysine demethylase 1A	ProteinCodingRNA	11.3221	11.1541	11.0099	11.2689	10.6004	10.6754	11.162	10.8482	-0.313783	0.18297	0.916005
ENSOCUT00000004441	ENSOCUG00000004434	CHD1	chromodomain helicase DNA binding protein 1	ProteinCodingRNA	11.1525	11.3552	11.2458	11.353	11.4315	11.1604	11.2512	11.315	0.0637976	0.573598	0.986021
ENSOCUT00000004440	ENSOCUG00000004441	PBLD	phenazine biosynthesis like protein domain containing	ProteinCodingRNA	5.96993	4.45875	5.06997	3.57674	4.60158	4.67071	5.16622	4.28301	-0.883206	0.0913136	0.771513
ENSOCUT00000004443	ENSOCUG00000004443	HNRNPH3	heterogeneous nuclear ribonucleoprotein H3	ProteinCodingRNA	10.8385	10.8903	11.0216	10.9401	11.1972	10.8449	10.9168	10.9941	0.0772899	0.531548	0.986021
ENSOCUT00000001162	ENSOCUG00000001162	SERINC4	serine incorporator 4	ProteinCodingRNA	8.63398	8.80664	8.93289	8.59838	8.94804	9.12067	8.79117	8.88903	0.0978569	0.558316	0.986021
ENSOCUT00000007712	ENSOCUG00000007714	---	---	ProteinCodingRNA	0	0	0	0	1.59655	0	0	0.532182	0.532182	0.638012	0.986021
ENSOCUT00000004449	ENSOCUG00000004451	---	---	ProteinCodingRNA	7.81859	7.86348	7.86806	7.73254	7.5871	7.82874	7.85004	7.71613	-0.133917	0.374382	0.986021
ENSOCUT00000001168	ENSOCUG00000001165	---	---	ProteinCodingRNA	13.0531	13.0544	13.0318	13.093	13.2113	13.0631	13.0464	13.1225	0.0760414	0.31611	0.986021
ENSOCUT00000003517	ENSOCUG00000003510	OCA2	OCA2 melanosomal transmembrane protein	ProteinCodingRNA	10.7535	9.71868	8.26056	10.5504	9.11797	8.30864	9.57758	9.32567	-0.251907	0.75567	0.986021
ENSOCUT00000022361	ENSOCUG00000021888	RF00493	---	OtherNonCodingRNA	2.13084	1.99947	2.72661	2.57749	3.01518	2.02102	2.28564	2.5379	0.252259	0.683726	0.986021
ENSOCUT00000022363	ENSOCUG00000023151	SLAMF1	signaling lymphocytic activation molecule family member 1	ProteinCodingRNA	3.47757	4.32125	5.92033	4.3134	6.52494	6.31301	4.57305	5.71712	1.14407	0.174134	0.911199
ENSOCUT00000006600	ENSOCUG00000006595	UBA7	ubiquitin like modifier activating enzyme 7	ProteinCodingRNA	8.08416	7.27542	8.74917	6.83659	7.27461	8.6426	8.03625	7.5846	-0.451645	0.516403	0.986021
ENSOCUT00000003514	ENSOCUG00000017891	SLC29A1	solute carrier family 29 member 1 (Augustine blood group)	ProteinCodingRNA	10.6041	10.6761	10.8425	10.4131	10.9332	11.1247	10.7076	10.8237	0.116087	0.489488	0.986021
ENSOCUT00000022367	ENSOCUG00000024992	RAB3C	RAB3C, member RAS oncogene family	ProteinCodingRNA	1.82162	0	0	0	0	0	0.607208	0	-0.607208	0.581472	0.986021
ENSOCUT00000022368	ENSOCUG00000009241	RAB11FIP2	RAB11 family interacting protein 2	ProteinCodingRNA	9.49192	9.51302	9.61937	9.42149	9.95249	9.84171	9.54144	9.73856	0.197127	0.213609	0.943975
MSTRG.16974.2	---	---	---	Predicted_LncRNA	11.6134	11.5021	11.284	11.7317	11.2735	11.3116	11.4665	11.4389	-0.0275717	0.914451	0.999819
MSTRG.14506.1	---	---	---	Predicted_LncRNA	5.22234	7.98797	7.64323	7.93943	4.82408	4.72734	6.95118	5.83028	-1.1209	0.456636	0.986021
ENSOCUT00000006058	ENSOCUG00000006059	PFN2	profilin 2	ProteinCodingRNA	7.78582	7.31217	7.63509	7.53023	7.4435	7.74893	7.5777	7.57422	-0.00347445	0.950778	0.999819
ENSOCUT00000032366	ENSOCUG00000028371	RF00322	---	OtherNonCodingRNA	4.0187	3.45878	4.62058	4.74625	3.01518	3.19481	4.03269	3.65208	-0.380607	0.73704	0.986021
ENSOCUT00000019263	ENSOCUG00000019263	---	---	OtherNonCodingRNA	4.85213	5.28471	4.40793	5.07875	4.71712	3.93301	4.84825	4.57629	-0.271963	0.602977	0.986021
ENSOCUT00000008556	ENSOCUG00000008558	---	---	ProteinCodingRNA	9.3497	9.56534	9.46505	9.26484	9.67553	9.58059	9.46003	9.50699	0.0469553	0.720955	0.986021
ENSOCUT00000008555	ENSOCUG00000008560	EGLN3	egl-9 family hypoxia inducible factor 3	ProteinCodingRNA	10.7591	12.4816	13.0943	12.092	13.9488	13.4006	12.1117	13.1471	1.03545	0.233359	0.953868
ENSOCUT00000008554	ENSOCUG00000008556	NAB1	NGFI-A binding protein 1	ProteinCodingRNA	10.3755	10.5558	10.6246	10.393	10.4075	10.3964	10.5186	10.399	-0.119652	0.229935	0.952191
ENSOCUT00000008550	ENSOCUG00000008551	---	---	ProteinCodingRNA	10.0425	10.2766	10.121	9.98397	10.2401	10.4542	10.1467	10.2261	0.0794137	0.578445	0.986021
ENSOCUT00000008162	ENSOCUG00000008163	TAPBPL	TAP binding protein like	ProteinCodingRNA	9.03113	9.09205	9.4742	8.88283	9.40533	9.30637	9.19912	9.19818	-0.000947121	0.986478	0.999819
ENSOCUT00000011056	ENSOCUG00000011058	---	---	OtherNonCodingRNA	7.86115	7.83218	8.05646	7.73926	7.24604	7.39412	7.9166	7.45981	-0.45679	0.0253105	0.489198
MSTRG.16770.1	---	---	---	Predicted_LncRNA	9.37195	9.37433	9.17089	9.7887	9.12322	9.12067	9.30572	9.34419	0.0384713	0.754179	0.986021
MSTRG.6334.1	---	---	---	Predicted_LncRNA	10.4704	11.0154	10.9757	10.8544	9.94362	10.2782	10.8205	10.3588	-0.461733	0.116118	0.824207
ENSOCUT00000008559	ENSOCUG00000008553	PRUNE2	prune homolog 2	ProteinCodingRNA	11.4307	11.5418	11.6855	10.6871	10.8557	11.3926	11.5527	10.9785	-0.57419	0.00985143	0.328167
MSTRG.15404.1	---	---	---	Predicted_LncRNA	10.3345	10.6584	10.685	10.6546	10.8239	10.7601	10.5593	10.7462	0.186908	0.182806	0.915735
MSTRG.13535.1	---	---	---	Predicted_LncRNA	8.60922	9.07343	9.31785	8.45458	10.5062	11.0593	9.00017	10.0067	1.00652	0.0153057	0.393008
ENSOCUT00000020298	ENSOCUG00000020298	RF00100	---	OtherNonCodingRNA	5.1209	4.99931	5.11745	5.12057	4.60158	4.61177	5.07922	4.77797	-0.301245	0.41392	0.986021
ENSOCUT00000000312	ENSOCUG00000000312	IGDCC4	immunoglobulin superfamily DCC subclass member 4	ProteinCodingRNA	10.5417	10.5577	10.9603	10.2078	8.9272	9.59208	10.6866	9.57568	-1.11087	0.00146072	0.116648
ENSOCUT00000015217	ENSOCUG00000015220	PECAM1	platelet and endothelial cell adhesion molecule 1	ProteinCodingRNA	11.5227	12.1474	12.1506	11.0217	12.9306	13.0981	11.9403	12.3501	0.409875	0.185322	0.918742
ENSOCUT00000024871	ENSOCUG00000013552	KCNN3	potassium calcium-activated channel subfamily N member 3	ProteinCodingRNA	4.93416	6.52286	6.64233	4.16145	6.30252	6.1975	6.03312	5.55382	-0.479293	0.566773	0.986021
ENSOCUT00000020292	ENSOCUG00000020292	RF00100	---	OtherNonCodingRNA	3.47757	3.16929	2.72661	0.99552	3.60086	3.34712	3.12449	2.64783	-0.476657	0.85229	0.99056
ENSOCUT00000006059	ENSOCUG00000006058	POLR1B	RNA polymerase I subunit B	ProteinCodingRNA	10.5588	10.514	10.5861	10.5769	10.7427	10.4584	10.553	10.5927	0.0397134	0.685113	0.986021
ENSOCUT00000020291	ENSOCUG00000020291	RF00100	---	OtherNonCodingRNA	1.42753	0	0	0	2.01302	0	0.475843	0.671008	0.195165	0.820154	0.986021
ENSOCUT00000001696	ENSOCUG00000001697	PTPRK	protein tyrosine phosphatase, receptor type K	ProteinCodingRNA	11.7643	11.4659	10.8774	11.833	10.9152	10.7677	11.3692	11.172	-0.197235	0.640257	0.986021
ENSOCUT00000018374	ENSOCUG00000018374	ocu-mir-302c	ocu-mir-302c	OtherNonCodingRNA	0	0	1.08665	1.57899	1.59655	1.01405	0.362216	1.39653	1.03431	0.252916	0.969516
ENSOCUT00000028278	ENSOCUG00000021543	---	---	OtherNonCodingRNA	10.7105	10.8542	10.7876	10.6863	10.2533	10.5835	10.7841	10.5077	-0.276386	0.0677966	0.712628
ENSOCUT00000023013	ENSOCUG00000025991	HSF2	heat shock transcription factor 2	ProteinCodingRNA	8.94471	9.03821	8.96244	8.77241	9.29576	9.26154	8.98179	9.1099	0.128114	0.416402	0.986021
ENSOCUT00000011747	ENSOCUG00000011743	SLU7	SLU7 homolog, splicing factor	ProteinCodingRNA	9.66257	10.0063	10.0386	9.8459	10.0915	9.92578	9.90249	9.95438	0.0518953	0.758182	0.986021
ENSOCUT00000023015	ENSOCUG00000023186	---	---	OtherNonCodingRNA	2.38533	0	2.1281	1.57899	1.59655	3.0245	1.50448	2.06668	0.562199	0.680345	0.986021
ENSOCUT00000033523	ENSOCUG00000029593	EFCAB2	EF-hand calcium binding domain 2	ProteinCodingRNA	5.37701	5.49116	5.25117	5.4175	4.82408	5.48676	5.37311	5.24278	-0.130329	0.745564	0.986021
ENSOCUT00000028903	ENSOCUG00000001670	PEX16	peroxisomal biogenesis factor 16	ProteinCodingRNA	8.11086	8.20386	8.1393	8.01897	8.7212	8.77273	8.15134	8.5043	0.352961	0.10193	0.799531
ENSOCUT00000028900	ENSOCUG00000026108	RF00108	---	OtherNonCodingRNA	0	2.32136	0	0	1.0087	2.34434	0.773786	1.11768	0.343893	0.887761	0.995584
ENSOCUT00000001382	ENSOCUG00000001383	MRPL9	mitochondrial ribosomal protein L9	ProteinCodingRNA	8.55516	8.25668	8.42996	8.29484	8.23645	8.40292	8.41393	8.3114	-0.102532	0.458909	0.986021
ENSOCUT00000001385	ENSOCUG00000001388	---	---	OtherNonCodingRNA	0.883565	1.99947	2.72661	1.99327	1.59655	1.60366	1.86988	1.73116	-0.13872	0.736665	0.986021
ENSOCUT00000001387	ENSOCUG00000001389	LINGO4	leucine rich repeat and Ig domain containing 4	ProteinCodingRNA	2.78963	4.16925	4.40793	2.99215	7.0833	6.31301	3.78893	5.46282	1.67389	0.0124156	0.35878
ENSOCUT00000028277	ENSOCUG00000026563	PSD2	pleckstrin and Sec7 domain containing 2	ProteinCodingRNA	4.62398	3.32129	4.24647	5.12057	3.60086	3.0245	4.06391	3.91531	-0.148605	0.960225	0.999819
ENSOCUT00000032109	ENSOCUG00000003516	GYG1	glycogenin-1	ProteinCodingRNA	11.8625	11.4871	10.645	12.1235	10.5487	10.4532	11.3316	11.0418	-0.289766	0.753053	0.986021
ENSOCUT00000032108	ENSOCUG00000015726	CELSR2	cadherin EGF LAG seven-pass G-type receptor 2	ProteinCodingRNA	7.49285	3.32129	6.64233	7.44229	6.55631	6.9466	5.81882	6.98173	1.16291	0.597065	0.986021
ENSOCUT00000001227	ENSOCUG00000001227	DDO	D-aspartate oxidase	ProteinCodingRNA	3.10507	1.99947	2.72661	0	4.54015	5.07152	2.61038	3.20389	0.593507	0.169404	0.909815
ENSOCUT00000032103	ENSOCUG00000027300	---	---	ProteinCodingRNA	0	3.45878	4.62058	1.99327	2.59943	3.0245	2.69312	2.53907	-0.154054	0.384783	0.986021
ENSOCUT00000032102	ENSOCUG00000028130	---	---	ProteinCodingRNA	10.981	10.6963	9.1821	11.4904	5.22633	4.19635	10.2865	6.97102	-3.31544	0.762332	0.986021
ENSOCUT00000026629	ENSOCUG00000024183	---	---	ProteinCodingRNA	0	0	0	0	2.01302	0	0	0.671008	0.671008	0.533908	0.986021
ENSOCUT00000026628	ENSOCUG00000010457	FCHSD2	FCH and double SH3 domains 2	ProteinCodingRNA	9.66257	10.1427	10.1753	9.55328	10.1101	10.4437	9.9935	10.0357	0.0421831	0.794368	0.986021
ENSOCUT00000019197	ENSOCUG00000019197	---	---	OtherNonCodingRNA	0.883565	0	0	2.31475	1.59655	1.01405	0.294522	1.64178	1.34726	0.150664	0.882943
ENSOCUT00000019191	ENSOCUG00000019191	RF00026	---	OtherNonCodingRNA	2.38533	2.58437	1.08665	2.31475	3.33754	2.02102	2.01878	2.55777	0.53899	0.524163	0.986021
ENSOCUT00000007867	ENSOCUG00000007857	LRRK2	leucine rich repeat kinase 2	ProteinCodingRNA	10.5136	10.7986	10.9805	10.3453	10.783	11.1181	10.7642	10.7488	-0.0154273	0.97852	0.999819
ENSOCUT00000019193	ENSOCUG00000019193	RF00026	---	OtherNonCodingRNA	1.42753	1.58449	1.69938	1.57899	2.33582	2.02102	1.57046	1.97861	0.408144	0.567357	0.986021
ENSOCUT00000007865	ENSOCUG00000007868	MTX3	metaxin 3	ProteinCodingRNA	7.11607	6.95349	7.1213	6.54571	6.509	6.55122	7.06362	6.53531	-0.528308	0.00424474	0.210554
MSTRG.5294.1	---	---	---	Predicted_LncRNA	7.6284	7.43392	7.07395	7.67757	7.79205	7.7693	7.37876	7.74631	0.367549	0.0851213	0.756616
ENSOCUT00000001222	ENSOCUG00000001221	---	---	ProteinCodingRNA	6.41773	6.10782	6.37569	6.25793	6.16684	6.55122	6.30042	6.32533	0.024917	0.911994	0.999819
ENSOCUT00000000388	ENSOCUG00000000388	LYPLAL1	lysophospholipase like 1	ProteinCodingRNA	8.74611	8.35684	8.54729	8.37476	8.30269	8.1468	8.55008	8.27475	-0.27533	0.0861722	0.75841
ENSOCUT00000007869	ENSOCUG00000007867	PUS10	pseudouridylate synthase 10	ProteinCodingRNA	9.26506	9.40017	9.38244	9.4194	9.36161	9.1074	9.34922	9.29613	-0.0530874	0.719548	0.986021
ENSOCUT00000009080	ENSOCUG00000009084	---	---	ProteinCodingRNA	9.20023	9.33244	9.26349	8.92768	9.07259	9.61101	9.26539	9.20376	-0.0616273	0.880965	0.993824
ENSOCUT00000026627	ENSOCUG00000021309	OR13D1	olfactory receptor family 13 subfamily D member 1	ProteinCodingRNA	0	0	0	2.57749	0	2.6083	0	1.7286	1.7286	0.119911	0.831191
ENSOCUT00000026626	ENSOCUG00000016914	SPRED3	sprouty related EVH1 domain containing 3	ProteinCodingRNA	7.08946	5.61401	5.94685	6.2006	5.0168	5.98171	6.21678	5.73304	-0.483738	0.292384	0.980264
ENSOCUT00000026993	ENSOCUG00000022895	---	---	ProteinCodingRNA	1.82162	1.58449	2.1281	0	0	1.60366	1.84474	0.534555	-1.31018	0.24916	0.968372
ENSOCUT00000030854	ENSOCUG00000023148	HYAL3	hyaluronoglucosaminidase 3	ProteinCodingRNA	6.02712	6.35685	6.47015	5.60592	5.99435	6.64239	6.28471	6.08088	-0.203823	0.672386	0.986021
ENSOCUT00000009081	ENSOCUG00000009083	SSR1	translocon-associated protein subunit alpha precursor	ProteinCodingRNA	3.10507	10.8812	10.8722	1.99327	4.10379	3.34712	8.28614	3.14806	-5.13808	1.24221e-05	0.00328964
ENSOCUT00000026996	ENSOCUG00000021632	---	---	OtherNonCodingRNA	2.6016	2.58437	1.69938	2.79967	0	1.01405	2.29511	1.27124	-1.02387	0.54019	0.986021
ENSOCUT00000030852	ENSOCUG00000023590	---	---	ProteinCodingRNA	4.52156	4.80667	3.85655	5.12057	5.40925	5.0271	4.39493	5.18564	0.79071	0.0590754	0.680633
ENSOCUT00000005712	ENSOCUG00000005709	PGM2L1	phosphoglucomutase 2 like 1	ProteinCodingRNA	8.40142	8.28006	8.2012	8.23423	7.93613	8.33166	8.29423	8.16734	-0.126889	0.466687	0.986021
ENSOCUT00000009086	ENSOCUG00000009088	STEAP1	metalloreductase STEAP1	ProteinCodingRNA	8.73757	8.91218	7.91584	8.78221	7.95978	8.87965	8.52186	8.54055	0.0186869	0.973216	0.999819
ENSOCUT00000005710	ENSOCUG00000005712	---	---	ProteinCodingRNA	9.87867	9.85571	9.82997	9.8919	9.82145	9.74046	9.85479	9.81794	-0.0368485	0.686322	0.986021
ENSOCUT00000026998	ENSOCUG00000024999	---	---	OtherNonCodingRNA	0	0	0	0	1.0087	0	0	0.336232	0.336232	0.80659	0.986021
ENSOCUT00000030859	ENSOCUG00000027353	RF00091	small nucleolar RNA, H/ACA box 6	OtherNonCodingRNA	4.76515	4.85729	3.96434	4.07902	4.54015	4.19635	4.52893	4.27184	-0.257091	0.485865	0.986021
ENSOCUT00000014517	ENSOCUG00000014516	CCDC68	coiled-coil domain containing 68	ProteinCodingRNA	8.18394	7.87581	8.71099	8.5571	9.96715	9.34985	8.25691	9.29137	1.03445	0.00447734	0.214128
ENSOCUT00000002970	ENSOCUG00000002969	---	---	ProteinCodingRNA	2.38533	1.58449	0	0	0	2.02102	1.32327	0.673674	-0.649599	0.652475	0.986021
ENSOCUT00000015459	ENSOCUG00000015463	MGAT2	mannosyl (alpha-1,6-)-glycoprotein beta-1,2-N-acetylglucosaminyltransferase	ProteinCodingRNA	9.83796	9.67524	9.43959	9.82234	9.39669	9.58059	9.65093	9.59988	-0.0510573	0.773064	0.986021
ENSOCUT00000023585	ENSOCUG00000014470	WDR13	WD repeat domain 13	ProteinCodingRNA	4.35286	4.39164	3.85655	0.99552	5.22633	4.48613	4.20035	3.56933	-0.63102	0.876689	0.993491
ENSOCUT00000009604	ENSOCUG00000009608	SPRY2	sprouty RTK signaling antagonist 2	ProteinCodingRNA	8.67034	8.44637	9.01039	8.76583	8.84067	8.89827	8.70903	8.83492	0.125889	0.549995	0.986021
ENSOCUT00000009607	ENSOCUG00000009598	LTBP1	latent transforming growth factor beta binding protein 1	ProteinCodingRNA	12.5262	12.9931	12.9811	12.2511	12.1223	12.7845	12.8335	12.3859	-0.447523	0.062058	0.695575
ENSOCUT00000009603	ENSOCUG00000009603	FAM114A1	family with sequence similarity 114 member A1	ProteinCodingRNA	10.8869	11.1104	11.1879	10.6385	10.1972	11.2447	11.0618	10.6935	-0.368284	0.25781	0.970468
ENSOCUT00000002847	ENSOCUG00000002845	IMP4	IMP4, U3 small nucleolar ribonucleoprotein	ProteinCodingRNA	9.04965	8.78392	8.9786	8.99386	9.11534	8.92272	8.93739	9.01064	0.0732489	0.593329	0.986021
ENSOCUT00000002846	ENSOCUG00000002844	CRK	CRK proto-oncogene, adaptor protein	ProteinCodingRNA	9.35343	9.20386	9.32039	9.30392	9.2389	9.21279	9.29256	9.25187	-0.0406916	0.678558	0.986021
ENSOCUT00000002845	ENSOCUG00000002848	CCL5	C-C motif chemokine ligand 5	ProteinCodingRNA	5.31711	6.59921	6.9218	6.71903	6.18702	6.36747	6.27937	6.42451	0.145135	0.964029	0.999819
ENSOCUT00000009608	ENSOCUG00000009592	COL19A1	collagen type XIX alpha 1 chain	ProteinCodingRNA	3.10507	3.45878	3.47433	2.57749	4.40884	4.27443	3.34606	3.75359	0.407523	0.34227	0.986021
ENSOCUT00000002842	ENSOCUG00000002842	HEATR9	HEAT repeat containing 9	ProteinCodingRNA	6.71323	6.06539	5.9729	5.79854	7.0616	7.45407	6.25051	6.7714	0.520897	0.182109	0.914954
ENSOCUT00000018028	ENSOCUG00000018028	RF00100	---	OtherNonCodingRNA	14.6991	14.9069	15.32	15.054	15.5991	15.5777	14.9754	15.4103	0.434918	0.0784251	0.739764
ENSOCUT00000002840	ENSOCUG00000002839	SETD2	SET domain containing 2	ProteinCodingRNA	12.6791	12.6794	12.6747	12.6899	12.6764	12.5715	12.6777	12.646	-0.0317934	0.657097	0.986021
MSTRG.1225.1	---	---	---	Predicted_LncRNA	9.79881	9.51696	9.91304	9.53407	9.67731	9.32483	9.74294	9.51207	-0.230862	0.158606	0.89397
ENSOCUT00000031483	ENSOCUG00000025769	---	---	OtherNonCodingRNA	10.5788	10.4171	10.5181	10.4089	10.7847	10.8774	10.5047	10.6903	0.185621	0.205087	0.938709
ENSOCUT00000004308	ENSOCUG00000004305	FYCO1	FYVE and coiled-coil domain containing 1	ProteinCodingRNA	12.5713	12.5438	12.3569	12.7856	12.1249	12.1475	12.4907	12.3527	-0.137987	0.617473	0.986021
ENSOCUT00000016865	ENSOCUG00000016867	SYT16	synaptotagmin 16	ProteinCodingRNA	3.77336	4.95351	5.25117	5.63506	6.01707	6.13609	4.65934	5.92941	1.27006	0.00903373	0.31677
MSTRG.15426.1	---	---	---	Predicted_LncRNA	6.00831	6.53845	6.31589	6.63497	7.02843	6.62759	6.28755	6.76366	0.476113	0.067951	0.712719
ENSOCUT00000013089	ENSOCUG00000013094	GPR160	G protein-coupled receptor 160	ProteinCodingRNA	5.84825	7.07611	6.90837	5.96845	6.89984	6.74194	6.61091	6.53674	-0.0741666	0.795775	0.986021
ENSOCUT00000019997	ENSOCUG00000019997	---	---	OtherNonCodingRNA	0	0	0	0	0	1.01405	0	0.338016	0.338016	0.80659	0.986021
ENSOCUT00000019996	ENSOCUG00000019996	---	---	OtherNonCodingRNA	2.38533	0.999643	2.45817	2.57749	1.59655	1.01405	1.94772	1.72936	-0.218356	0.813186	0.986021
ENSOCUT00000019990	ENSOCUG00000019990	---	---	OtherNonCodingRNA	0	0	1.08665	0.99552	0	0	0.362216	0.33184	-0.0303763	0.992719	0.999819
ENSOCUT00000013207	ENSOCUG00000013208	AAED1	AhpC/TSA antioxidant enzyme domain containing 1	ProteinCodingRNA	6.5537	6.2847	6.57591	6.01353	6.18702	6.70012	6.47144	6.30022	-0.171211	0.598121	0.986021
ENSOCUT00000013205	ENSOCUG00000013207	POU6F1	POU class 6 homeobox 1	ProteinCodingRNA	8.25748	8.49913	8.57731	8.23898	8.94804	8.73526	8.44464	8.64076	0.196118	0.335053	0.986021
ENSOCUT00000013204	ENSOCUG00000013203	TSEN2	tRNA splicing endonuclease subunit 2	ProteinCodingRNA	7.94269	7.43392	7.7749	7.9218	7.94208	7.65718	7.71717	7.84035	0.123184	0.582912	0.986021
ENSOCUT00000007498	ENSOCUG00000007496	SPPL3	signal peptide peptidase like 3	ProteinCodingRNA	11.2791	10.983	10.6661	11.2053	10.5052	10.4073	10.9761	10.7059	-0.270123	0.361522	0.986021
ENSOCUT00000013202	ENSOCUG00000013206	---	---	ProteinCodingRNA	8.23338	8.47502	8.19014	8.31298	8.43514	8.22754	8.29951	8.32522	0.0257065	0.880854	0.993824
ENSOCUT00000007166	ENSOCUG00000007162	---	---	ProteinCodingRNA	11.2128	11.3889	11.0797	11.4262	11.1607	11.0343	11.2272	11.2071	-0.0200945	0.914766	0.999819
ENSOCUT00000009003	ENSOCUG00000009003	KRT27	keratin 27	ProteinCodingRNA	15.9964	15.7913	14.2638	16.5473	9.04797	9.59398	15.3505	11.7298	-3.62074	0.766289	0.986021
ENSOCUT00000033322	ENSOCUG00000017572	PPP2R5A	protein phosphatase 2 regulatory subunit Balpha	ProteinCodingRNA	10.6684	10.77	10.72	10.4004	10.6994	10.6799	10.7195	10.5933	-0.126203	0.312905	0.986021
MSTRG.16457.1	---	---	---	Predicted_LncRNA	7.64067	7.86965	8.84748	7.73926	8.40961	7.94671	8.11927	8.03186	-0.0874077	0.673256	0.986021
ENSOCUT00000033123	ENSOCUG00000029098	---	---	OtherNonCodingRNA	3.47757	3.58431	3.96434	2.57749	4.10379	2.83136	3.67541	3.17088	-0.50453	0.573219	0.986021
ENSOCUT00000014462	ENSOCUG00000014461	LPCAT3	lysophosphatidylcholine acyltransferase 3	ProteinCodingRNA	10.9068	10.4203	9.90967	10.7367	10.0941	10.1443	10.4122	10.325	-0.0872027	0.705184	0.986021
ENSOCUT00000014460	ENSOCUG00000014460	PODXL2	podocalyxin like 2	ProteinCodingRNA	3.10507	2.58437	1.69938	3.16195	2.01302	2.34434	2.46294	2.50644	0.0435016	0.997833	0.999819
ENSOCUT00000011620	ENSOCUG00000011622	COX18	COX18, cytochrome c oxidase assembly factor	ProteinCodingRNA	7.15079	6.90618	6.85334	7.69843	7.33916	7.49541	6.97011	7.511	0.540893	0.00673384	0.272755
ENSOCUT00000014837	ENSOCUG00000014837	SLC39A12	solute carrier family 39 member 12	ProteinCodingRNA	3.47757	4.39164	4.15842	1.99327	6.12561	5.19712	4.00921	4.43867	0.429461	0.203713	0.938709
ENSOCUT00000014464	ENSOCUG00000014464	GAS2	growth arrest specific 2	ProteinCodingRNA	4.29193	4.45875	6.18831	3.45128	1.59655	5.45358	4.97966	3.50047	-1.4792	0.319029	0.986021
ENSOCUT00000014468	ENSOCUG00000014475	KCNA4	---	OtherNonCodingRNA	2.95595	3.32129	3.32054	1.99327	0	3.0245	3.19926	1.67259	-1.52667	0.210774	0.940696
ENSOCUT00000014469	ENSOCUG00000014473	PEX19	peroxisomal biogenesis factor 19	ProteinCodingRNA	10.3136	10.5051	10.3116	10.2401	10.535	10.6995	10.3768	10.4915	0.114773	0.426399	0.986021
ENSOCUT00000013087	ENSOCUG00000013064	TLN2	talin 2	ProteinCodingRNA	12.184	12.1934	12.098	12.307	12.0965	12.1643	12.1585	12.1893	0.0308053	0.726651	0.986021
ENSOCUT00000031452	ENSOCUG00000021522	---	---	ProteinCodingRNA	0	0	0	1.57899	0	0	0	0.526329	0.526329	0.642233	0.986021
ENSOCUT00000031101	ENSOCUG00000020963	---	---	ProteinCodingRNA	6.13513	6.14904	6.1659	6.21996	5.94779	6.17732	6.15002	6.11503	-0.0349985	0.897329	0.997855
ENSOCUT00000031102	ENSOCUG00000021901	---	---	OtherNonCodingRNA	9.34596	9.19158	9.17651	9.21504	9.15173	9.17257	9.23802	9.17978	-0.058233	0.55755	0.986021
ENSOCUT00000031103	ENSOCUG00000027515	RF01191	small nucleolar RNA, C/D box 121B	OtherNonCodingRNA	3.47757	3.90623	3.85655	4.16145	4.18631	3.93301	3.74678	4.09359	0.346807	0.434774	0.986021
ENSOCUT00000031104	ENSOCUG00000022710	---	---	ProteinCodingRNA	7.07145	8.47502	8.60672	8.70872	7.18714	7.1467	8.05106	7.68086	-0.370207	0.565782	0.986021
ENSOCUT00000031107	ENSOCUG00000027801	---	---	ProteinCodingRNA	0	1.58449	0	0	1.59655	0	0.528162	0.532182	0.00401935	0.995693	0.999819
MSTRG.9809.1	---	---	---	Predicted_LncRNA	6.1694	7.62865	7.57684	7.89193	7.86901	7.98205	7.12496	7.91433	0.789366	0.0947941	0.781567
ENSOCUT00000027865	ENSOCUG00000017768	PCP4L1	Purkinje cell protein 4 like 1	ProteinCodingRNA	5.6682	5.45873	6.2954	5.45066	6.75865	6.31301	5.80744	6.17411	0.366662	0.336931	0.986021
ENSOCUT00000031458	ENSOCUG00000001419	CSAD	cysteine sulfinic acid decarboxylase	ProteinCodingRNA	10.2227	9.84947	9.89782	9.99385	10.1048	9.99228	9.98998	10.0303	0.0403203	0.829455	0.986329
ENSOCUT00000027867	ENSOCUG00000015943	---	---	ProteinCodingRNA	11.8997	11.8365	11.637	12.0541	11.9874	11.9197	11.7911	11.9871	0.196028	0.0740198	0.735859
ENSOCUT00000019786	ENSOCUG00000027599	RF00100	---	OtherNonCodingRNA	5.95035	6.06539	6.70584	6.51469	6.99448	7.05012	6.24052	6.8531	0.612571	0.0561383	0.668947
ENSOCUT00000027861	ENSOCUG00000023881	SEC24C	SEC24 homolog C, COPII coat complex component	ProteinCodingRNA	11.64	11.6135	11.6359	11.6149	11.6362	11.7145	11.6298	11.6552	0.0253575	0.697139	0.986021
ENSOCUT00000027862	ENSOCUG00000023308	PXT1	peroxisomal, testis specific 1	ProteinCodingRNA	0	0	1.69938	0	0	0	0.566458	0	-0.566458	0.620804	0.986021
ENSOCUT00000010017	ENSOCUG00000010018	MKS1	Meckel syndrome, type 1	ProteinCodingRNA	8.50235	8.32572	8.35767	8.62767	8.24128	8.22754	8.39525	8.3655	-0.0297472	0.90666	0.99906
ENSOCUT00000017047	ENSOCUG00000017049	FAM118B	family with sequence similarity 118 member B	ProteinCodingRNA	8.21298	7.59175	7.48932	8.05715	7.50106	7.54351	7.76468	7.70057	-0.0641113	0.780389	0.986021
ENSOCUT00000017046	ENSOCUG00000017042	PEPD	peptidase D	ProteinCodingRNA	10.6236	10.5491	10.4936	10.7172	10.0644	10.5835	10.5554	10.4551	-0.100334	0.695326	0.986021
ENSOCUT00000017041	ENSOCUG00000017040	OSTF1	osteoclast stimulating factor 1	ProteinCodingRNA	9.87348	9.77736	9.78289	9.91139	9.92871	9.85448	9.81125	9.89819	0.0869462	0.315405	0.986021
ENSOCUT00000010012	ENSOCUG00000010013	NOL3	nucleolar protein 3	ProteinCodingRNA	4.46749	4.52288	4.06464	3.89852	4.60158	4.48613	4.35167	4.32874	-0.022926	0.976262	0.999819
ENSOCUT00000010011	ENSOCUG00000010009	EPX	eosinophil peroxidase	ProteinCodingRNA	6.73628	7.15916	7.39615	7.3834	5.79839	6.17732	7.0972	6.45303	-0.644163	0.279435	0.979983
ENSOCUT00000017042	ENSOCUG00000017048	UCN	urocortin	ProteinCodingRNA	2.13084	0	1.69938	0	1.59655	2.34434	1.27674	1.31363	0.0368913	0.95344	0.999819
ENSOCUT00000006227	ENSOCUG00000006231	---	---	ProteinCodingRNA	11.4307	11.3814	11.1145	11.7044	11.1068	11.1688	11.3089	11.3267	0.0177969	0.855502	0.991171
ENSOCUT00000017049	ENSOCUG00000017054	TEX33	testis expressed 33	ProteinCodingRNA	2.95595	0	0	0	2.33582	3.19481	0.985317	1.84354	0.858224	0.711405	0.986021
ENSOCUT00000010018	ENSOCUG00000010019	EXOC3L1	exocyst complex component 3 like 1	ProteinCodingRNA	4.57368	4.64317	4.40793	0	0	0	4.54159	0	-4.54159	8.65472e-08	3.93745e-05
ENSOCUT00000024106	ENSOCUG00000003451	CCNL1	cyclin L1	ProteinCodingRNA	5.08543	5.58426	5.16341	5.1612	5.66085	5.07152	5.2777	5.29786	0.0201528	0.933868	0.999819
ENSOCUT00000000823	ENSOCUG00000000823	PDE12	phosphodiesterase 12	ProteinCodingRNA	9.39386	9.47096	9.49681	9.71555	9.6968	9.86556	9.45388	9.7593	0.305424	0.00243831	0.157219
ENSOCUT00000024104	ENSOCUG00000023035	RF00020	---	OtherNonCodingRNA	2.6016	0.999643	0	0	1.59655	1.60366	1.20041	1.06674	-0.133676	0.743837	0.986021
ENSOCUT00000024105	ENSOCUG00000023036	RF00026	---	OtherNonCodingRNA	1.42753	0.999643	3.32054	2.79967	2.59943	2.6083	1.91591	2.66913	0.753226	0.629683	0.986021
ENSOCUT00000024103	ENSOCUG00000000504	PGC	progastricsin	ProteinCodingRNA	0.883565	1.58449	2.95286	0	2.01302	2.34434	1.80697	1.45246	-0.354515	0.778639	0.986021
ENSOCUT00000013336	ENSOCUG00000013330	LARP1B	La ribonucleoprotein domain family member 1B	ProteinCodingRNA	9.82727	10.0868	9.53883	10.1993	9.86124	9.78115	9.81762	9.94722	0.129601	0.533894	0.986021
ENSOCUT00000008621	ENSOCUG00000008623	TMEM229B	transmembrane protein 229B	ProteinCodingRNA	10.2298	9.66285	8.83333	10.3661	8.56419	9.05858	9.57532	9.32961	-0.245707	0.776015	0.986021
ENSOCUT00000008984	ENSOCUG00000008981	---	---	ProteinCodingRNA	9.9568	9.82742	9.79024	10.0851	9.46026	9.4996	9.85815	9.68166	-0.176497	0.468199	0.986021
MSTRG.5483.1	---	---	---	Predicted_LncRNA	10.0723	9.95348	9.75126	10.1022	9.97297	9.67718	9.92567	9.91744	-0.00822667	0.979621	0.999819
ENSOCUT00000006098	ENSOCUG00000006098	MMRN1	multimerin 1	ProteinCodingRNA	11.6522	12.4235	12.1994	10.8176	12.8427	13.334	12.0917	12.3314	0.239771	0.314429	0.986021
ENSOCUT00000028728	ENSOCUG00000022715	ZFHX2	zinc finger homeobox 2	ProteinCodingRNA	7.14219	7.6575	7.80421	7.83656	0	7.74208	7.53464	5.19288	-2.34176	0.841209	0.988931
ENSOCUT00000030273	ENSOCUG00000027750	---	---	ProteinCodingRNA	1.82162	0.999643	1.08665	0.99552	0	1.01405	1.30264	0.669856	-0.632782	0.482536	0.986021
ENSOCUT00000030272	ENSOCUG00000026945	RF00026	---	OtherNonCodingRNA	1.82162	0	1.08665	0	2.01302	0	0.969424	0.671008	-0.298416	0.909455	0.999819
ENSOCUT00000016506	ENSOCUG00000016514	DDX59	DEAD-box helicase 59	ProteinCodingRNA	8.7546	8.45462	8.66779	8.56848	8.74181	8.7318	8.62567	8.6807	0.055027	0.721277	0.986021
ENSOCUT00000015759	ENSOCUG00000015755	DENND2D	DENN domain containing 2D	ProteinCodingRNA	10.9744	10.8534	10.9829	10.7392	11.0003	11.0016	10.9369	10.9137	-0.0231428	0.867737	0.992646
ENSOCUT00000030276	ENSOCUG00000023490	PRICKLE1	prickle planar cell polarity protein 1	ProteinCodingRNA	10.0157	9.85416	9.79389	10.0917	9.54479	9.87342	9.88791	9.83664	-0.0512743	0.830621	0.986988
ENSOCUT00000015757	ENSOCUG00000015752	ACSS3	acyl-CoA synthetase short chain family member 3	ProteinCodingRNA	7.67089	8.02166	7.1329	7.6277	8.12056	7.59006	7.60848	7.77944	0.170957	0.624638	0.986021
ENSOCUT00000030278	ENSOCUG00000023402	---	---	ProteinCodingRNA	7.9914	7.67172	7.90911	7.74596	7.1465	7.42868	7.85741	7.44038	-0.417032	0.0696203	0.719894
ENSOCUT00000015755	ENSOCUG00000015736	PHLPP1	PH domain and leucine rich repeat protein phosphatase 1	ProteinCodingRNA	10.6677	10.4699	10.642	10.3497	10.3234	10.3157	10.5932	10.3296	-0.263628	0.00455352	0.216024
ENSOCUT00000015754	ENSOCUG00000015750	UBA5	ubiquitin like modifier activating enzyme 5	ProteinCodingRNA	9.42788	9.32796	9.12517	9.30845	9.22432	9.24466	9.29367	9.25915	-0.0345254	0.738937	0.986021
MSTRG.13509.1	---	---	---	Predicted_LncRNA	11.2518	10.7441	10.8653	10.808	11.3449	10.9661	10.9537	11.0397	0.0859094	0.677161	0.986021
ENSOCUT00000015750	ENSOCUG00000023948	BCL11A	B cell CLL/lymphoma 11A	ProteinCodingRNA	8.18394	8.22329	7.99424	8.11518	7.4435	7.08304	8.13382	7.54724	-0.586581	0.0770722	0.737209
ENSOCUT00000030949	ENSOCUG00000027422	RF00026	---	OtherNonCodingRNA	0	0	0	0	0	1.01405	0	0.338016	0.338016	0.80659	0.986021
ENSOCUT00000015381	ENSOCUG00000015392	METTL21C	methyltransferase like 21C	ProteinCodingRNA	7.67089	6.52286	7.49832	6.95688	8.06712	8.05576	7.23069	7.69326	0.462568	0.271354	0.972598
MSTRG.18429.1	---	---	---	Predicted_LncRNA	5.84825	5.28471	5.71959	5.54581	4.77159	6.0048	5.61752	5.44073	-0.176785	0.784729	0.986021
MSTRG.6973.2	---	---	---	Predicted_LncRNA	9.86828	0	9.95937	0	0	0	6.60922	0	-6.60922	0.00261544	0.162258
MSTRG.3310.1	---	---	---	Predicted_LncRNA	9.51876	9.47502	9.48102	9.49685	8.82143	8.73526	9.4916	9.01785	-0.473754	0.0635275	0.69967
ENSOCUT00000025449	ENSOCUG00000025712	ORYCUNV1R1587	vomeronasal 1 receptor oryCunV1R1587	ProteinCodingRNA	0	0	2.72661	0.99552	0	0	0.908872	0.33184	-0.577032	0.484328	0.986021
ENSOCUT00000010479	ENSOCUG00000010476	FANCC	Fanconi anemia complementation group C	ProteinCodingRNA	8.81809	9.05186	9.57542	8.97118	9.44148	9.22513	9.14846	9.2126	0.0641417	0.862854	0.99148
ENSOCUT00000010829	ENSOCUG00000010827	BOC	BOC cell adhesion associated, oncogene regulated	ProteinCodingRNA	12.161	12.5248	12.9997	12.5769	13.7138	12.9666	12.5618	13.0858	0.523934	0.100771	0.796525
MSTRG.8040.1	---	---	---	Predicted_LncRNA	12.5424	12.4211	12.3972	12.6385	12.6373	12.6723	12.4536	12.6494	0.195808	0.0110928	0.345166
ENSOCUT00000030948	ENSOCUG00000026031	GLTPD2	glycolipid transfer protein domain containing 2	ProteinCodingRNA	0	0	0	0	1.59655	1.01405	0	0.870198	0.870198	0.515106	0.986021
MSTRG.16462.2	---	---	---	Predicted_LncRNA	8.15856	8.4505	8.57731	8.39619	8.39233	8.29466	8.39546	8.36106	-0.0343984	0.800378	0.986021
ENSOCUT00000009007	ENSOCUG00000009008	HGD	homogentisate 1,2-dioxygenase	ProteinCodingRNA	4.41131	3.16929	3.32054	3.69216	3.33754	3.19481	3.63372	3.40817	-0.225546	0.564971	0.986021
ENSOCUT00000021509	ENSOCUG00000023515	---	---	ProteinCodingRNA	6.60469	7.05457	7.49832	6.59103	6.60212	6.70012	7.05253	6.63109	-0.421438	0.110128	0.809443
MSTRG.15741.1	---	---	---	Predicted_LncRNA	4.0187	4.80667	4.15842	4.23943	4.77159	5.27516	4.32793	4.76206	0.43413	0.333914	0.986021
MSTRG.7303.1	---	---	---	Predicted_LncRNA	3.58305	1.58449	0	4.16145	2.01302	2.83136	1.72251	3.00194	1.27943	0.461429	0.986021
ENSOCUT00000000346	ENSOCUG00000000346	HERPUD2	HERPUD family member 2	ProteinCodingRNA	9.31184	9.69626	9.65801	9.61492	9.62465	9.66817	9.55537	9.63591	0.0805423	0.61156	0.986021
MSTRG.743.1	---	---	---	Predicted_LncRNA	8.3463	8.28469	8.24461	8.4909	7.90601	7.91659	8.29187	8.1045	-0.187371	0.45033	0.986021
ENSOCUT00000015388	ENSOCUG00000015363	NFASC	neurofascin	ProteinCodingRNA	6.23561	6.71354	6.81065	5.31318	6.82454	6.29439	6.5866	6.14404	-0.442564	0.434684	0.986021
ENSOCUT00000006613	ENSOCUG00000006613	SPATA1	spermatogenesis associated 1	ProteinCodingRNA	2.13084	3.45878	3.14838	2.79967	2.82223	4.1138	2.91267	3.24523	0.332563	0.588092	0.986021
ENSOCUT00000010474	ENSOCUG00000010472	SLC30A5	solute carrier family 30 member 5	ProteinCodingRNA	11.0173	10.8704	10.8868	11.0429	10.9099	10.9175	10.9249	10.9567	0.0318848	0.734581	0.986021
MSTRG.10626.1	---	---	---	Predicted_LncRNA	5.25463	5.90619	5.48634	5.63506	5.47638	5.69984	5.54905	5.60376	0.0547111	0.907589	0.999649
ENSOCUT00000021186	ENSOCUG00000021160	---	---	ProteinCodingRNA	3.85986	2.99938	2.95286	2.57749	2.01302	2.34434	3.2707	2.31162	-0.959079	0.119716	0.831191
ENSOCUT00000016318	ENSOCUG00000016322	IL12B	interleukin 12B	ProteinCodingRNA	2.78963	2.58437	3.14838	1.57899	0	0	2.84079	0.526329	-2.31446	0.0212655	0.453941
ENSOCUT00000016319	ENSOCUG00000016321	GLT8D2	glycosyltransferase 8 domain containing 2	ProteinCodingRNA	8.64316	8.82901	9.11643	8.40044	8.39667	9.6297	8.86287	8.80894	-0.0539316	0.8765	0.993468
MSTRG.6607.1	---	---	---	Predicted_LncRNA	2.13084	0	2.95286	0	4.10379	5.07152	1.69456	3.05843	1.36387	0.166307	0.90461
MSTRG.2950.1	---	---	---	Predicted_LncRNA	2.38533	7.02166	4.55312	7.71899	2.33582	3.0245	4.65337	4.35977	-0.293603	0.778341	0.986021
MSTRG.8838.2	---	---	---	Predicted_LncRNA	6.10002	6.50709	6.50627	6.12044	6.12561	6.36747	6.37113	6.20451	-0.166619	0.492841	0.986021
ENSOCUT00000010471	ENSOCUG00000010471	FOXO3	forkhead box O3	ProteinCodingRNA	11.2761	11.1098	10.7756	11.5278	11.3499	11.0758	11.0538	11.3178	0.263974	0.166489	0.904678
ENSOCUT00000016310	ENSOCUG00000016313	TDG	thymine DNA glycosylase	ProteinCodingRNA	9.82054	9.81307	9.67199	9.87368	9.1127	9.55931	9.76854	9.51523	-0.253306	0.299175	0.983233
MSTRG.8838.1	---	---	---	Predicted_LncRNA	8.79906	8.53845	8.61087	8.34861	8.27467	8.31789	8.64946	8.31372	-0.335739	0.0104357	0.334831
ENSOCUT00000016317	ENSOCUG00000016311	GLS2	glutaminase 2	ProteinCodingRNA	9.58692	9.40017	9.11351	9.58723	9.31881	9.35435	9.36686	9.42013	0.0532643	0.798198	0.986021
ENSOCUT00000012154	ENSOCUG00000012158	CLDN20	claudin 20	ProteinCodingRNA	5.48981	4.80667	4.32946	5.51478	6.16684	5.11461	4.87531	5.59875	0.723435	0.137344	0.867272
ENSOCUT00000012155	ENSOCUG00000012155	PCSK1	proprotein convertase subtilisin/kexin type 1	ProteinCodingRNA	7.34324	6.62865	5.86577	6.746	5.1043	5.58196	6.61255	5.81075	-0.801802	0.177751	0.914954
ENSOCUT00000012156	ENSOCUG00000012156	ATF2	activating transcription factor 2	ProteinCodingRNA	10.1036	10.37	10.507	10.239	10.4075	10.3964	10.3269	10.3476	0.0207699	0.92094	0.999819
ENSOCUT00000002754	ENSOCUG00000002755	VMO1	vitelline membrane outer layer 1 homolog	ProteinCodingRNA	1.42753	0	4.32946	0	3.60086	2.83136	1.919	2.14407	0.225078	0.887378	0.995584
ENSOCUT00000012150	ENSOCUG00000012152	MCL1	MCL1, BCL2 family apoptosis regulator	ProteinCodingRNA	10.0858	9.42765	10.552	10.6439	11.0314	10.6582	10.0218	10.7778	0.756012	0.0173947	0.422787
ENSOCUT00000002158	ENSOCUG00000002159	PTPN12	protein tyrosine phosphatase, non-receptor type 12	ProteinCodingRNA	10.4453	10.6902	10.3971	10.765	10.5938	10.6835	10.5108	10.6808	0.169913	0.176754	0.914954
ENSOCUT00000012152	ENSOCUG00000012154	TFB1M	transcription factor B1, mitochondrial	ProteinCodingRNA	8.96924	8.80664	9.14821	8.98257	8.75539	8.78612	8.9747	8.84136	-0.133338	0.364371	0.986021
ENSOCUT00000021500	ENSOCUG00000021315	---	---	OtherNonCodingRNA	0.883565	1.99947	1.69938	0.99552	1.0087	1.01405	1.52747	1.00609	-0.52138	0.493381	0.986021
ENSOCUT00000002155	ENSOCUG00000002160	---	---	ProteinCodingRNA	7.05321	7.56153	7.75252	7.37478	7.68259	7.51162	7.45575	7.523	0.0672451	0.845421	0.989085
ENSOCUT00000002154	ENSOCUG00000002158	CASP2	caspase 2	ProteinCodingRNA	10.2982	9.90918	10.0736	10.1061	9.71949	9.4996	10.0937	9.77506	-0.318599	0.133563	0.861748
ENSOCUT00000002157	ENSOCUG00000002156	PATL1	PAT1 homolog 1, processing body mRNA decay factor	ProteinCodingRNA	9.98834	10.1579	10.1311	10.2637	10.2207	10.1598	10.0925	10.2147	0.122255	0.196712	0.930487
ENSOCUT00000002156	ENSOCUG00000002155	SUPT5H	SPT5 homolog, DSIF elongation factor subunit	ProteinCodingRNA	12.4716	12.3792	12.2324	12.6057	12.2581	12.1414	12.3611	12.3351	-0.0260016	0.922544	0.999819
ENSOCUT00000002151	ENSOCUG00000002152	NDUFAF4	NADH:ubiquinone oxidoreductase complex assembly factor 4	ProteinCodingRNA	6.59211	5.78066	5.77985	6.18097	6.57174	6.13609	6.05087	6.29627	0.245394	0.561411	0.986021
ENSOCUT00000002150	ENSOCUG00000002150	RPS16	ribosomal protein S16	ProteinCodingRNA	13.6502	13.6708	13.7338	13.7108	13.8001	13.8205	13.685	13.7772	0.0922135	0.224337	0.951569
ENSOCUT00000002153	ENSOCUG00000002153	ATAT1	alpha tubulin acetyltransferase 1	ProteinCodingRNA	8.25349	7.86348	8.09847	8.08382	7.86275	7.91659	8.07181	7.95439	-0.117427	0.470551	0.986021
ENSOCUT00000002152	ENSOCUG00000002151	SDR39U1	short chain dehydrogenase/reductase family 39U member 1	ProteinCodingRNA	8.57447	8.28469	8.30737	8.29939	8.65029	8.55536	8.38885	8.50168	0.112837	0.508378	0.986021
ENSOCUT00000020537	ENSOCUG00000020537	RF00577	small nucleolar RNA, C/D box 72	OtherNonCodingRNA	3.10507	2.80674	2.45817	1.99327	2.33582	2.02102	2.79	2.1167	-0.673291	0.297496	0.983233
ENSOCUT00000011838	ENSOCUG00000011838	---	---	ProteinCodingRNA	6.04569	6.49115	6.93511	5.94537	6.01707	6.71419	6.49065	6.22554	-0.265108	0.472729	0.986021
ENSOCUT00000011836	ENSOCUG00000011836	FLG2	filaggrin family member 2	ProteinCodingRNA	15.0793	15.9583	16.1298	15.3118	16.0272	16.4981	15.7225	15.9457	0.223215	0.550626	0.986021
ENSOCUT00000014805	ENSOCUG00000014806	---	---	ProteinCodingRNA	8.73757	8.64314	8.79004	8.96546	8.61348	8.82556	8.72358	8.8015	0.0779196	0.558107	0.986021
ENSOCUT00000011834	ENSOCUG00000011825	ZDHHC1	zinc finger DHHC-type containing 1	ProteinCodingRNA	7.8768	8.27075	8.23388	8.31748	7.60971	7.69316	8.12714	7.87345	-0.253693	0.381528	0.986021
MSTRG.6973.1	---	---	---	Predicted_LncRNA	13.2916	12.5498	10.7142	13.183	9.37046	9.63711	12.1852	10.7302	-1.45501	0.572379	0.986021
ENSOCUT00000014800	ENSOCUG00000014805	WNT3	Wnt family member 3	ProteinCodingRNA	9.66257	9.67348	9.51022	9.83653	9.35939	9.1649	9.61542	9.45361	-0.161815	0.506813	0.986021
ENSOCUT00000014802	ENSOCUG00000014794	ATP2A3	ATPase sarcoplasmic/endoplasmic reticulum Ca2+ transporting 3	ProteinCodingRNA	8.66434	8.66817	9.20151	8.11	9.20713	9.34759	8.84467	8.88824	0.0435669	0.739167	0.986021
ENSOCUT00000006384	ENSOCUG00000006384	CNGA1	cyclic nucleotide gated channel alpha 1	ProteinCodingRNA	0	0	0	1.99327	4.01626	2.02102	0	2.67685	2.67685	0.00345791	0.185641
ENSOCUT00000003409	ENSOCUG00000003404	MAN2A1	mannosidase alpha class 2A member 1	ProteinCodingRNA	12.2511	12.2856	12.4023	12.4199	12.3302	12.3731	12.313	12.3744	0.0614442	0.45274	0.986021
ENSOCUT00000006438	ENSOCUG00000006433	VCP	valosin containing protein	ProteinCodingRNA	13.3366	13.1848	12.9507	13.4402	12.8536	12.964	13.1574	13.0859	-0.0714396	0.781913	0.986021
ENSOCUT00000006387	ENSOCUG00000006388	ANKRD13D	ankyrin repeat domain 13D	ProteinCodingRNA	6.94854	7.35684	7.24402	7.23901	6.77207	6.64239	7.18314	6.88449	-0.298646	0.264909	0.970543
ENSOCUT00000006381	ENSOCUG00000006381	LY86	lymphocyte antigen 86	ProteinCodingRNA	3.58305	5.55389	5.25117	3.89852	4.54015	4.93393	4.79604	4.45753	-0.338503	0.424463	0.986021
ENSOCUT00000000268	ENSOCUG00000000264	UBR4	ubiquitin protein ligase E3 component n-recognin 4	ProteinCodingRNA	14.4142	14.3195	14.3798	14.4311	14.4177	14.3145	14.3712	14.3878	0.0166086	0.835455	0.987758
ENSOCUT00000006920	ENSOCUG00000006919	SLC5A11	Sodium/myo-inositol cotransporter 2	ProteinCodingRNA	1.42753	0	2.72661	0	2.33582	2.02102	1.38471	1.45228	0.0675646	0.98935	0.999819
ENSOCUT00000003401	ENSOCUG00000003403	---	---	ProteinCodingRNA	7.55899	7.83218	7.41527	7.14084	7.54081	8.25187	7.60215	7.64451	0.0423594	0.746328	0.986021
ENSOCUT00000003150	ENSOCUG00000003153	TRIB2	tribbles pseudokinase 2	ProteinCodingRNA	10.3078	9.67171	9.89101	9.72913	9.65756	9.81909	9.95685	9.73526	-0.221586	0.202623	0.937932
ENSOCUT00000006923	ENSOCUG00000006924	FAM171A1	family with sequence similarity 171 member A1	ProteinCodingRNA	10.8914	10.8971	10.6889	10.4728	10.4488	10.6862	10.8258	10.5359	-0.289888	0.0165553	0.411392
ENSOCUT00000003404	ENSOCUG00000003405	MFSD6	major facilitator superfamily domain containing 6	ProteinCodingRNA	12.1282	12.1208	11.742	12.2836	11.6261	11.5451	11.997	11.8183	-0.178723	0.532232	0.986021
ENSOCUT00000006389	ENSOCUG00000006390	AFTPH	aftiphilin	ProteinCodingRNA	11.6408	11.6413	11.619	11.6674	11.5526	11.4683	11.6337	11.5628	-0.0709292	0.422535	0.986021
ENSOCUT00000003154	ENSOCUG00000003156	C11orf16	chromosome 11 open reading frame 16	ProteinCodingRNA	1.82162	3.69978	2.72661	1.99327	4.71712	4.19635	2.74934	3.63558	0.88624	0.21799	0.94854
ENSOCUT00000006927	ENSOCUG00000006927	ARHGAP42	Rho GTPase activating protein 42	ProteinCodingRNA	10.0437	10.2731	9.83708	10.5427	9.34599	9.5632	10.0513	9.81731	-0.233968	0.659462	0.986021
ENSOCUT00000007754	ENSOCUG00000007756	OR10Z1	olfactory receptor family 10 subfamily Z member 1	ProteinCodingRNA	0	0	0	0	2.59943	0	0	0.866475	0.866475	0.415826	0.986021
ENSOCUT00000020844	ENSOCUG00000020844	RF00001	---	OtherNonCodingRNA	2.78963	1.99947	1.08665	0	1.59655	1.60366	1.95858	1.06674	-0.891843	0.34078	0.986021
ENSOCUT00000022637	ENSOCUG00000023089	ATF6B	activating transcription factor 6 beta	ProteinCodingRNA	10.7815	10.7399	10.8157	10.7773	10.7714	10.6454	10.779	10.7314	-0.0476797	0.568857	0.986021
ENSOCUT00000003421	ENSOCUG00000003420	SAMD4A	sterile alpha motif domain containing 4A	ProteinCodingRNA	10.9774	11.2922	11.4572	10.576	11.4097	11.4511	11.2423	11.1456	-0.0966839	0.828147	0.986124
ENSOCUT00000016505	ENSOCUG00000016510	RUVBL1	RuvB like AAA ATPase 1	ProteinCodingRNA	10.0689	9.81787	9.43959	9.98256	9.47879	9.39424	9.77544	9.61853	-0.156909	0.514451	0.986021
ENSOCUT00000022997	ENSOCUG00000000827	SLMAP	sarcolemmal membrane-associated protein	ProteinCodingRNA	11.7317	11.9378	12.0775	11.8389	12.0576	11.9657	11.9157	11.9541	0.0383991	0.792497	0.986021
ENSOCUT00000022626	ENSOCUG00000002851	SH2B3	SH2B adaptor protein 3	ProteinCodingRNA	7.76356	7.6575	7.85412	7.40047	7.82462	7.94074	7.75839	7.72194	-0.03645	0.919798	0.999819
ENSOCUT00000007490	ENSOCUG00000007487	SLCO1C1	solute carrier organic anion transporter family member 1C1	ProteinCodingRNA	6.02712	6.12858	6.45175	6.07862	6.6896	7.07215	6.20248	6.61345	0.41097	0.170947	0.909815
ENSOCUT00000022992	ENSOCUG00000017600	PGAP2	post-GPI attachment to proteins 2	ProteinCodingRNA	10.1548	9.99505	10.1795	10.0598	10.0753	10.1585	10.1098	10.0979	-0.011884	0.890192	0.995818
ENSOCUT00000022622	ENSOCUG00000022055	RF00026	---	OtherNonCodingRNA	0.883565	0	0	0	1.0087	0	0.294522	0.336232	0.0417101	0.992719	0.999819
ENSOCUT00000007527	ENSOCUG00000007527	CCDC125	coiled-coil domain containing 125	ProteinCodingRNA	8.73184	8.64314	8.6797	8.5571	8.77885	9.00519	8.6849	8.78038	0.0954834	0.505141	0.986021
ENSOCUT00000001943	ENSOCUG00000001938	LSS	lanosterol synthase	ProteinCodingRNA	12.5243	12.3552	12.2213	12.5736	12.5179	12.8681	12.3669	12.6532	0.286324	0.0527209	0.650054
ENSOCUT00000007525	ENSOCUG00000007525	---	---	ProteinCodingRNA	1.42753	0	2.1281	0	0	0	1.18521	0	-1.18521	0.327585	0.986021
ENSOCUT00000022628	ENSOCUG00000021365	---	---	ProteinCodingRNA	1.42753	3.16929	2.95286	2.31475	0	0	2.51656	0.771584	-1.74497	0.198671	0.933285
ENSOCUT00000022633	ENSOCUG00000022061	RF01210	---	OtherNonCodingRNA	0	1.58449	2.1281	0.99552	0	0	1.23753	0.33184	-0.905688	0.350565	0.986021
ENSOCUT00000012565	ENSOCUG00000012561	SLC43A3	solute carrier family 43 member 3	ProteinCodingRNA	10.3782	10.9858	11.4721	10.4759	11.0152	11.2729	10.9454	10.9213	-0.024057	0.864723	0.992119
ENSOCUT00000012564	ENSOCUG00000012566	POU2AF1	POU class 2 associating factor 1	ProteinCodingRNA	2.95595	3.99933	3.74004	1.99327	4.71712	5.38484	3.56511	4.03174	0.466634	0.255004	0.969868
ENSOCUT00000012567	ENSOCUG00000012571	COA4	cytochrome c oxidase assembly factor 4 homolog	ProteinCodingRNA	7.20963	7.9241	7.65936	7.85525	7.71074	7.62028	7.59769	7.72876	0.131062	0.649669	0.986021
ENSOCUT00000029528	ENSOCUG00000025006	---	---	ProteinCodingRNA	8.43703	8.50708	8.25527	8.39193	8.55645	8.49956	8.39979	8.48265	0.0828556	0.561754	0.986021
ENSOCUT00000012560	ENSOCUG00000012553	---	---	ProteinCodingRNA	0	2.80674	2.72661	0	5.26481	0	1.84445	1.75494	-0.0895151	0.466237	0.986021
ENSOCUT00000012563	ENSOCUG00000012564	EIF3K	eukaryotic translation initiation factor 3 subunit K	ProteinCodingRNA	11.665	11.436	11.3551	11.5365	11.688	11.5037	11.4853	11.5761	0.0907046	0.489012	0.986021
ENSOCUT00000031523	ENSOCUG00000015449	ACTN1	actinin alpha 1	ProteinCodingRNA	12.7874	12.6096	12.1453	13.1702	11.582	11.5273	12.5141	12.0931	-0.420966	0.611776	0.986021
ENSOCUT00000029523	ENSOCUG00000021398	CDK5	cyclin dependent kinase 5	ProteinCodingRNA	8.289	8.30307	8.0069	8.4089	8.60975	8.5117	8.19966	8.51012	0.310464	0.0434914	0.610497
ENSOCUT00000024832	ENSOCUG00000022521	---	---	ProteinCodingRNA	0	0.999643	0	0	0	0	0.333214	0	-0.333214	0.820752	0.986021
MSTRG.3673.1	---	---	---	Predicted_LncRNA	8.90457	9.22088	9.14821	9.33755	9.12322	8.81253	9.09122	9.0911	-0.000118751	0.955191	0.999819
ENSOCUT00000012569	ENSOCUG00000012546	ZNF462	zinc finger protein 462	ProteinCodingRNA	11.3145	10.9986	10.8256	10.9561	10.5438	10.7945	11.0462	10.7648	-0.281416	0.116862	0.826086
ENSOCUT00000024833	ENSOCUG00000027113	ARL14EPL	ADP ribosylation factor like GTPase 14 effector protein like	ProteinCodingRNA	2.38533	3.80669	4.24647	2.57749	4.82408	5.15645	3.4795	4.18601	0.706508	0.275851	0.979021
ENSOCUT00000021714	ENSOCUG00000022448	ACTN4	actinin alpha 4	ProteinCodingRNA	14.1948	14.0732	14.0614	14.3492	14.1521	13.9846	14.1098	14.162	0.0521748	0.666251	0.986021
ENSOCUT00000021716	ENSOCUG00000027862	CNPY3	canopy FGF signaling regulator 3	ProteinCodingRNA	8.76864	8.78065	8.98181	8.78221	8.75877	8.66814	8.8437	8.73637	-0.107331	0.381713	0.986021
ENSOCUT00000030943	ENSOCUG00000026104	---	---	ProteinCodingRNA	4.22832	5.64316	5.44971	5.99117	5.87502	5.27516	5.10706	5.71378	0.606722	0.26017	0.970468
ENSOCUT00000021711	ENSOCUG00000023543	---	---	ProteinCodingRNA	3.47757	1.99947	0	0	0	0	1.82568	0	-1.82568	0.0829862	0.755177
MSTRG.18176.1	---	---	---	Predicted_LncRNA	6.45989	7.60662	7.78229	7.01346	7.76545	7.5824	7.28293	7.45377	0.170842	0.801713	0.986021
ENSOCUT00000006659	ENSOCUG00000006660	IL36G	interleukin 36 gamma	ProteinCodingRNA	8.26146	10.1692	11.32	9.576	9.1997	10.5729	9.91688	9.78287	-0.134008	0.578693	0.986021
ENSOCUT00000006656	ENSOCUG00000006655	HSPA9	heat shock protein family A (Hsp70) member 9	ProteinCodingRNA	12.1325	12.0461	12.0103	12.1775	12.2274	11.9919	12.063	12.1323	0.0692932	0.481737	0.986021
ENSOCUT00000006654	ENSOCUG00000006654	MZT1	mitotic spindle organizing protein 1	ProteinCodingRNA	4.76515	3.69978	3.96434	3.79902	3.33754	3.19481	4.14309	3.44379	-0.699302	0.157651	0.891682
ENSOCUT00000025328	ENSOCUG00000010690	FAM126B	family with sequence similarity 126 member B	ProteinCodingRNA	8.06608	8.04368	7.90235	7.57604	8.27467	8.25187	8.00404	8.03419	0.0301559	0.794291	0.986021
ENSOCUT00000021718	ENSOCUG00000007846	NEK10	NIMA related kinase 10	ProteinCodingRNA	5.95035	6.02167	5.59095	5.84916	5.74493	6.34954	5.85432	5.98121	0.126892	0.652357	0.986021
ENSOCUT00000003628	ENSOCUG00000003625	---	---	OtherNonCodingRNA	0	0	0	0	0	1.60366	0	0.534555	0.534555	0.636309	0.986021
ENSOCUT00000006651	ENSOCUG00000006647	IQCH	IQ motif containing H	ProteinCodingRNA	2.6016	0	3.14838	3.16195	0	4.19635	1.91666	2.45277	0.536107	0.556564	0.986021
ENSOCUT00000023132	ENSOCUG00000005540	CAPN6	calpain 6	ProteinCodingRNA	7.3803	7.52285	8.74917	7.37478	7.15677	9.30171	7.88411	7.94442	0.0603145	0.671956	0.986021
MSTRG.19306.1	---	---	---	Predicted_LncRNA	2.6016	2.80674	4.55312	2.57749	2.33582	2.34434	3.32049	2.41922	-0.90127	0.130284	0.854465
ENSOCUT00000022042	ENSOCUG00000021674	RF00105	---	OtherNonCodingRNA	0	0	0	0	0	1.60366	0	0.534555	0.534555	0.636309	0.986021
MSTRG.4915.1	---	---	---	Predicted_LncRNA	8.83954	9.4023	9.54101	9.18333	9.67553	9.3521	9.26095	9.40365	0.142704	0.59152	0.986021
ENSOCUT00000031257	ENSOCUG00000023448	---	---	ProteinCodingRNA	7.79134	7.56915	7.91584	7.70531	6.63187	6.83507	7.75877	7.05742	-0.701355	0.0577785	0.678177
ENSOCUT00000021311	ENSOCUG00000027940	HSPA4L	heat shock protein family A (Hsp70) member 4 like	ProteinCodingRNA	10.9074	10.7691	10.6267	10.9188	10.1772	9.9966	10.7677	10.3642	-0.403533	0.180926	0.914954
MSTRG.8384.1	---	---	---	Predicted_LncRNA	3.10507	3.45878	4.32946	4.7987	4.26436	4.67071	3.6311	4.57792	0.946822	0.0758907	0.737087
ENSOCUT00000030301	ENSOCUG00000006966	ACADVL	acyl-CoA dehydrogenase very long chain	ProteinCodingRNA	11.7224	11.6717	11.4421	11.8342	11.7743	11.8126	11.6121	11.807	0.194946	0.0773301	0.737999
ENSOCUT00000022199	ENSOCUG00000021769	RF00015	---	OtherNonCodingRNA	5.82694	5.69974	6.21037	5.45066	6.89984	6.55122	5.91235	6.30057	0.388224	0.251203	0.968372
ENSOCUT00000022198	ENSOCUG00000005335	CARF	calcium responsive transcription factor	ProteinCodingRNA	6.38893	7.49114	6.3361	3.16195	5.87502	7.43719	6.73873	5.49139	-1.24734	0.553347	0.986021
ENSOCUT00000019380	ENSOCUG00000019380	RF00099	---	OtherNonCodingRNA	0	1.99947	0	1.57899	3.01518	1.60366	0.666488	2.06594	1.39946	0.262729	0.970468
ENSOCUT00000022195	ENSOCUG00000021768	RF00100	---	OtherNonCodingRNA	3.47757	0.999643	2.45817	2.31475	0	0	2.31179	0.771584	-1.54021	0.250982	0.968372
MSTRG.14314.1	---	---	---	Predicted_LncRNA	8.40861	7.56915	7.36698	8.43814	7.39227	7.42011	7.78158	7.75017	-0.0314038	0.961986	0.999819
ENSOCUT00000025830	ENSOCUG00000004641	AQP5	aquaporin 5	ProteinCodingRNA	4.0187	3.69978	3.96434	3.45128	3.01518	4.67071	3.89427	3.71239	-0.181885	0.983236	0.999819
ENSOCUT00000000179	ENSOCUG00000000179	RPS15A	ribosomal protein S15a	ProteinCodingRNA	13.2832	13.3854	13.6103	13.3067	13.8712	13.6698	13.4263	13.6159	0.189628	0.29069	0.980264
MSTRG.6927.1	---	---	---	Predicted_LncRNA	7.1763	7.56153	7.69108	7.22949	8.00026	8.02221	7.47631	7.75065	0.274347	0.295309	0.982314
ENSOCUT00000007389	ENSOCUG00000007381	OPHN1	oligophrenin 1	ProteinCodingRNA	10.6519	10.4608	10.4197	10.4047	10.0131	10.1194	10.5108	10.179	-0.331747	0.0286315	0.52339
ENSOCUT00000007388	ENSOCUG00000007388	VRK2	vaccinia related kinase 2	ProteinCodingRNA	9.29642	9.53067	9.59652	9.24843	9.48492	9.70917	9.47453	9.48084	0.00630459	0.936153	0.999819
MSTRG.12167.1	---	---	---	Predicted_LncRNA	7.89227	7.48311	7.39615	7.89193	7.35708	7.56697	7.59051	7.60533	0.014821	0.959102	0.999819
ENSOCUT00000007383	ENSOCUG00000007383	CCNT1	cyclin T1	ProteinCodingRNA	10.3136	10.5462	10.5324	10.4078	10.621	10.5188	10.4641	10.5159	0.051804	0.664425	0.986021
ENSOCUT00000007382	ENSOCUG00000007385	BCL2L11	BCL2 like 11	ProteinCodingRNA	5.69197	6.37433	6.5928	6.34869	6.35698	6.48708	6.2197	6.39758	0.177878	0.651373	0.986021
ENSOCUT00000000173	ENSOCUG00000000175	TMEM74	transmembrane protein 74	ProteinCodingRNA	2.38533	4.52288	4.32946	3.79902	3.33754	3.83334	3.74589	3.65663	-0.0892546	0.630379	0.986021
ENSOCUT00000007380	ENSOCUG00000007379	KANSL2	KAT8 regulatory NSL complex subunit 2	ProteinCodingRNA	10.1267	9.89411	10.0339	9.88282	10.1272	10.0322	10.0183	10.014	-0.00420842	0.971	0.999819
ENSOCUT00000000175	ENSOCUG00000000174	EXOC6	exocyst complex component 6	ProteinCodingRNA	9.68199	9.86193	9.46734	9.74592	9.14659	9.24223	9.67042	9.37825	-0.292168	0.19381	0.928347
ENSOCUT00000007386	ENSOCUG00000007390	TEX49	testis expressed 49	ProteinCodingRNA	1.42753	2.99938	2.95286	2.99215	2.33582	2.6083	2.45992	2.64542	0.185502	0.919376	0.999819
ENSOCUT00000007495	ENSOCUG00000007495	RNASE1	ribonuclease A family member 1, pancreatic	ProteinCodingRNA	5.51668	4.7542	5.02088	5.07875	4.71712	4.93393	5.09725	4.90993	-0.187321	0.54683	0.986021
ENSOCUT00000007384	ENSOCUG00000007386	CLEC1B	C-type lectin domain family 1, member B	ProteinCodingRNA	2.78963	0	0	1.57899	2.59943	3.34712	0.929875	2.50851	1.57864	0.387333	0.986021
ENSOCUT00000015716	ENSOCUG00000015719	SCO1	SCO1, cytochrome c oxidase assembly protein	ProteinCodingRNA	9.60894	9.3458	9.1596	9.49486	8.87528	8.99369	9.37145	9.12128	-0.250166	0.290686	0.980264
ENSOCUT00000000673	ENSOCUG00000000673	GEMIN2	gem nuclear organelle associated protein 2	ProteinCodingRNA	8.31984	7.70665	7.85412	7.59099	7.67547	7.84802	7.9602	7.70482	-0.25538	0.215881	0.94854
ENSOCUT00000008344	ENSOCUG00000008344	TM7SF3	transmembrane 7 superfamily member 3	ProteinCodingRNA	10.2728	10.1854	10.2504	10.2672	9.76719	9.69681	10.2362	9.91039	-0.325805	0.0987709	0.793871
MSTRG.18706.1	---	---	---	Predicted_LncRNA	11.7267	11.3127	11.2458	12.005	10.6836	10.8126	11.4284	11.1671	-0.261355	0.689303	0.986021
ENSOCUT00000013782	ENSOCUG00000013786	ACOT13	acyl-CoA thioesterase 13	ProteinCodingRNA	6.48732	6.37433	6.41422	6.67761	7.18714	6.86061	6.42529	6.90846	0.483164	0.0308234	0.534603
ENSOCUT00000013783	ENSOCUG00000013790	CMC2	C-X9-C motif containing 2	ProteinCodingRNA	5.28621	4.95351	5.44971	5.4175	5.1043	5.41962	5.22981	5.31381	0.0839975	0.801078	0.986021
ENSOCUT00000023578	ENSOCUG00000023020	MAPK8IP1	mitogen-activated protein kinase 8 interacting protein 1	ProteinCodingRNA	7.45167	8.00491	7.98786	7.78548	7.62458	7.46243	7.81481	7.62416	-0.19065	0.366346	0.986021
ENSOCUT00000008345	ENSOCUG00000008345	FANCF	Fanconi anemia complementation group F	ProteinCodingRNA	6.50084	5.72722	6.02363	6.38345	6.83737	6.59753	6.0839	6.60611	0.522218	0.103078	0.802489
ENSOCUT00000004878	ENSOCUG00000004879	---	---	ProteinCodingRNA	7.20137	7.25668	7.54247	7.3834	6.58701	6.62759	7.3335	6.866	-0.467505	0.149466	0.882866
ENSOCUT00000013787	ENSOCUG00000013785	PRKCE	protein kinase C epsilon type	ProteinCodingRNA	10.3819	10.3447	10.3432	10.4215	10.3016	10.1365	10.3566	10.2865	-0.0700716	0.547056	0.986021
ENSOCUT00000013785	ENSOCUG00000013791	ADAM30	ADAM metallopeptidase domain 30	ProteinCodingRNA	1.82162	0	0	0	2.59943	3.48487	0.607208	2.0281	1.42089	0.231414	0.952743
ENSOCUT00000023572	ENSOCUG00000000887	MSRB3	methionine sulfoxide reductase B3	ProteinCodingRNA	8.40861	7.95929	8.44865	8.03545	8.7073	8.61285	8.27218	8.45187	0.179684	0.443051	0.986021
ENSOCUT00000004875	ENSOCUG00000004872	GUCY2D	guanylate cyclase 2D, retinal	ProteinCodingRNA	1.82162	2.80674	2.1281	2.31475	0	3.0245	2.25215	1.77975	-0.472405	0.937801	0.999819
MSTRG.17425.1	---	---	---	Predicted_LncRNA	8.20474	8.32122	7.96857	8.36174	8.71427	8.21769	8.16484	8.43123	0.266388	0.17101	0.909815
ENSOCUT00000013789	ENSOCUG00000013794	TRMO	tRNA methyltransferase O	ProteinCodingRNA	7.6649	7.54619	7.24402	7.322	7.45187	7.28517	7.48504	7.35301	-0.132023	0.443157	0.986021
ENSOCUT00000023576	ENSOCUG00000003131	SETD9	SET domain containing 9	ProteinCodingRNA	8.35004	8.53067	8.72639	8.37907	9.09679	9.10473	8.5357	8.8602	0.324496	0.151313	0.883746
ENSOCUT00000004871	ENSOCUG00000004875	---	---	OtherNonCodingRNA	1.82162	1.99947	2.95286	2.31475	2.59943	2.83136	2.25798	2.58185	0.323863	0.69984	0.986021
ENSOCUT00000004872	ENSOCUG00000004871	RARS2	arginyl-tRNA synthetase 2, mitochondrial	ProteinCodingRNA	8.8815	9.287	8.98502	9.12547	8.93914	9.05582	9.05117	9.04014	-0.0110293	0.904669	0.998805
ENSOCUT00000004873	ENSOCUG00000004873	LRRC70	leucine rich repeat containing 70	ProteinCodingRNA	7.8559	8.51104	8.39186	7.51464	9.06443	8.64994	8.25293	8.40967	0.156738	0.511866	0.986021
ENSOCUT00000017283	ENSOCUG00000017285	KCNV1	potassium voltage-gated channel modifier subfamily V member 1	ProteinCodingRNA	0	1.99947	2.1281	1.99327	2.01302	0	1.37585	1.33543	-0.040421	0.974488	0.999819
ENSOCUT00000019926	ENSOCUG00000019926	RF00402	---	OtherNonCodingRNA	4.35286	3.80669	4.32946	4.07902	4.77159	4.61177	4.163	4.48746	0.324458	0.442489	0.986021
ENSOCUT00000010342	ENSOCUG00000010343	TRIM27	tripartite motif containing 27	ProteinCodingRNA	9.52539	9.58237	9.70927	9.50871	9.77554	9.84011	9.60568	9.70812	0.102443	0.42645	0.986021
ENSOCUT00000009833	ENSOCUG00000009834	SNX30	sorting nexin family member 30	ProteinCodingRNA	10.0402	10.0854	9.69565	10.2449	9.31881	9.57482	9.94043	9.71284	-0.227589	0.496795	0.986021
ENSOCUT00000009832	ENSOCUG00000009829	PBRM1	polybromo 1	ProteinCodingRNA	12.8225	12.6733	12.5507	12.8062	12.4696	12.5243	12.6822	12.6	-0.082129	0.580813	0.986021
ENSOCUT00000017865	ENSOCUG00000017865	CAMK2A	calcium/calmodulin dependent protein kinase II alpha	ProteinCodingRNA	3.85986	4.16925	4.06464	2.99215	3.01518	4.1138	4.03125	3.37371	-0.657541	0.296675	0.98303
ENSOCUT00000009837	ENSOCUG00000009840	SLC46A2	solute carrier family 46 member 2	ProteinCodingRNA	7.06236	6.86966	6.65847	6.54571	6.2839	7.03897	6.8635	6.62286	-0.240634	0.438738	0.986021
ENSOCUT00000009836	ENSOCUG00000009838	FIGN	fidgetin, microtubule severing factor	ProteinCodingRNA	7.46553	7.93003	8.64367	6.70536	8.79866	9.34307	8.01308	8.28236	0.269286	0.364386	0.986021
ENSOCUT00000009835	ENSOCUG00000009833	SLC24A3	solute carrier family 24 member 3	ProteinCodingRNA	9.43494	9.64314	9.85469	9.60391	8.89689	9.10205	9.64426	9.20095	-0.443313	0.0674671	0.710005
ENSOCUT00000000715	ENSOCUG00000000715	CD44	CD44 molecule (Indian blood group)	ProteinCodingRNA	13.0471	13.1936	13.1114	13.1802	13.2775	13.06	13.1174	13.1726	0.0552187	0.575238	0.986021
ENSOCUT00000000714	ENSOCUG00000000714	RARB	retinoic acid receptor beta	ProteinCodingRNA	5.84825	5.55389	5.86577	5.60592	6.26504	6.1975	5.75597	6.02282	0.26685	0.338898	0.986021
ENSOCUT00000000717	ENSOCUG00000000718	SLC1A2	solute carrier family 1 member 2	ProteinCodingRNA	4.09201	4.08679	3.14838	5.3488	5.26481	3.72627	3.77573	4.77996	1.00423	0.0638271	0.70114
ENSOCUT00000000716	ENSOCUG00000000716	EPSTI1	epithelial stromal interaction 1	ProteinCodingRNA	5.88996	6.55388	6.70584	6.1409	5.47638	6.43703	6.38323	6.0181	-0.365125	0.352998	0.986021
ENSOCUT00000000711	ENSOCUG00000000711	---	---	ProteinCodingRNA	6.50084	6.76748	6.50627	6.33099	6.42653	5.75536	6.59153	6.17096	-0.420573	0.14616	0.881555
ENSOCUT00000000710	ENSOCUG00000000709	TPGS2	tubulin polyglutamylase complex subunit 2	ProteinCodingRNA	9.56937	9.83059	9.62554	9.72066	9.0807	9.29236	9.67517	9.36457	-0.310597	0.152608	0.8843
ENSOCUT00000000713	ENSOCUG00000000713	TMEM135	transmembrane protein 135	ProteinCodingRNA	9.35716	9.47502	9.20426	9.56089	9.45611	9.79611	9.34548	9.60437	0.258893	0.0759125	0.737087
ENSOCUT00000017868	ENSOCUG00000017869	C11orf42	chromosome 11 open reading frame 42	ProteinCodingRNA	7.78582	7.65034	7.41527	7.54566	7.38356	7.70731	7.61714	7.54551	-0.0716352	0.683882	0.986021
ENSOCUT00000012578	ENSOCUG00000012582	RAB21	RAB21, member RAS oncogene family	ProteinCodingRNA	10.3523	10.7212	10.643	10.5872	11.032	11.0703	10.5722	10.8965	0.324332	0.0719944	0.730359
ENSOCUT00000008127	ENSOCUG00000008127	CALD1	caldesmon 1	ProteinCodingRNA	12.6283	12.5241	12.3893	12.6742	12.3342	12.4892	12.5139	12.4992	-0.0146899	0.93203	0.999819
ENSOCUT00000008124	ENSOCUG00000008124	MMADHC	methylmalonic aciduria and homocystinuria, cblD type	ProteinCodingRNA	10.0677	10.216	10.1739	9.80962	10.2059	10.4116	10.1525	10.1424	-0.0101453	0.956998	0.999819
ENSOCUT00000008125	ENSOCUG00000008126	LDLRAD1	low density lipoprotein receptor class A domain containing 1	ProteinCodingRNA	0.883565	2.99938	3.14838	1.99327	3.01518	3.34712	2.34377	2.78519	0.441418	0.749909	0.986021
ENSOCUT00000034141	ENSOCUG00000029586	PLA2G2C	phospholipase A2 group IIC	ProteinCodingRNA	0	0	1.69938	0	2.01302	3.72627	0.566458	1.9131	1.34664	0.202023	0.937932
ENSOCUT00000033191	ENSOCUG00000029283	---	---	ProteinCodingRNA	8.48884	8.23291	8.09847	8.19563	8.56419	8.5117	8.27341	8.42384	0.15043	0.426468	0.986021
ENSOCUT00000033190	ENSOCUG00000016511	PARK7	Parkinsonism associated deglycase	ProteinCodingRNA	5.48981	4.9062	6.54151	4.63524	7.12574	6.78259	5.64584	6.18119	0.535351	0.30368	0.983233
ENSOCUT00000033193	ENSOCUG00000029748	---	---	ProteinCodingRNA	3.77336	3.69978	3.96434	3.79902	3.01518	3.0245	3.81249	3.27957	-0.532926	0.350493	0.986021
ENSOCUT00000033192	ENSOCUG00000016836	GPX5	glutathione peroxidase 5	ProteinCodingRNA	0	0	2.1281	0	0	0	0.709366	0	-0.709366	0.516882	0.986021
MSTRG.3851.1	---	---	---	Predicted_LncRNA	9.74016	11.4856	10.924	11.1522	12.1844	11.4326	10.7166	11.5897	0.873123	0.0804006	0.745179
ENSOCUT00000033197	ENSOCUG00000029679	ZNF24	zinc finger protein 24	ProteinCodingRNA	10.6526	10.5917	10.6143	10.7325	10.5957	10.5603	10.6196	10.6295	0.00993851	0.895617	0.997619
ENSOCUT00000033196	ENSOCUG00000029397	---	---	ProteinCodingRNA	10.9888	10.602	10.3369	10.724	10.3738	10.3122	10.6426	10.47	-0.172577	0.384878	0.986021
ENSOCUT00000033199	ENSOCUG00000015263	IFRD1	interferon related developmental regulator 1	ProteinCodingRNA	6.2676	6.10782	6.50627	6.43407	6.20693	6.67154	6.2939	6.43751	0.143615	0.552179	0.986021
ENSOCUT00000033198	ENSOCUG00000029506	---	---	ProteinCodingRNA	15.8461	15.0096	13.2601	15.7802	7.57184	8.37217	14.7053	10.5747	-4.13056	0.667044	0.986021
ENSOCUT00000023714	ENSOCUG00000025300	---	---	ProteinCodingRNA	0	1.58449	0	0	0	0	0.528162	0	-0.528162	0.648025	0.986021
ENSOCUT00000011424	ENSOCUG00000011427	MAPKAPK5	mitogen-activated protein kinase-activated protein kinase 5	ProteinCodingRNA	10.2479	10.246	10.1195	10.2753	10.1337	10.0586	10.2045	10.1558	-0.0486421	0.650318	0.986021
ENSOCUT00000023712	ENSOCUG00000025093	FAM57B	family with sequence similarity 57 member B	ProteinCodingRNA	0	0	0	2.79967	0	3.0245	0	1.94139	1.94139	0.0744097	0.735859
ENSOCUT00000023710	ENSOCUG00000024702	---	---	ProteinCodingRNA	12.4857	12.0413	11.7114	12.4563	10.9715	10.264	12.0795	11.2306	-0.848849	0.250509	0.968372
MSTRG.12621.2	---	---	---	Predicted_LncRNA	12.2314	12.0664	12.1841	12.3739	12.2569	12.2616	12.1606	12.2975	0.13684	0.122936	0.837335
ENSOCUT00000015038	ENSOCUG00000015035	HECTD2	HECT domain E3 ubiquitin protein ligase 2	ProteinCodingRNA	9.99553	9.96507	10.0539	9.28796	10.1232	10.1815	10.0048	9.86423	-0.140611	0.726508	0.986021
MSTRG.642.1	---	---	---	Predicted_LncRNA	10.0711	10.2905	10.4479	9.31522	10.7401	10.766	10.2698	10.2738	0.0039804	0.715479	0.986021
ENSOCUT00000027006	ENSOCUG00000026830	---	---	ProteinCodingRNA	11.6586	11.5524	10.682	12.2493	8.75539	8.89518	11.2977	9.96662	-1.33105	0.683401	0.986021
ENSOCUT00000015033	ENSOCUG00000015020	COL5A2	collagen type V alpha 2 chain	ProteinCodingRNA	14.2393	14.3833	14.5721	14.1594	13.2218	14.8488	14.3982	14.0766	-0.321601	0.638768	0.986021
ENSOCUT00000027004	ENSOCUG00000024528	---	---	ProteinCodingRNA	5.40604	5.9993	6.69022	5.31318	6.95971	6.45391	6.03185	6.24227	0.210412	0.609788	0.986021
MSTRG.13767.1	---	---	---	Predicted_LncRNA	11.501	11.202	11.2391	11.4099	10.2071	9.9966	11.314	10.5379	-0.776138	0.0833472	0.755177
ENSOCUT00000015036	ENSOCUG00000015038	ABCG8	ATP binding cassette subfamily G member 8	ProteinCodingRNA	0	0	0	0	0	3.72627	0	1.24209	1.24209	0.252525	0.969329
ENSOCUT00000027001	ENSOCUG00000021712	NFKB1	nuclear factor kappa B subunit 1	ProteinCodingRNA	10.8985	11.191	11.8544	11.0258	11.7359	11.5377	11.3146	11.4331	0.118524	0.758146	0.986021
MSTRG.19098.1	---	---	---	Predicted_LncRNA	9.90815	9.4023	10.06	10.3331	10.7143	10.219	9.79015	10.4221	0.631982	0.00621747	0.262341
MSTRG.14423.1	---	---	---	Predicted_LncRNA	4.16177	4.9062	4.68502	4.94551	5.89969	5.45358	4.58433	5.43293	0.848596	0.0374765	0.576553
ENSOCUT00000024921	ENSOCUG00000027425	---	---	ProteinCodingRNA	1.82162	0.999643	2.72661	1.57899	1.0087	1.01405	1.84929	1.20058	-0.648717	0.373943	0.986021
ENSOCUT00000003626	ENSOCUG00000003627	GPSM2	G protein signaling modulator 2	ProteinCodingRNA	12.4701	12.0317	11.5639	12.3516	10.7814	11.12	12.0219	11.4177	-0.604211	0.255896	0.969868
ENSOCUT00000024923	ENSOCUG00000027764	---	---	ProteinCodingRNA	3.68134	4.52288	4.40793	3.69216	4.10379	4.34851	4.20405	4.04815	-0.155897	0.723076	0.986021
ENSOCUT00000026174	ENSOCUG00000022573	HLA-DMA	major histocompatibility complex, class II, DM alpha	ProteinCodingRNA	7.28971	8.55771	8.80461	8.20051	8.43935	8.55145	8.21735	8.3971	0.179759	0.888817	0.995598
ENSOCUT00000024290	ENSOCUG00000023145	RF00108	---	OtherNonCodingRNA	2.13084	0.999643	1.08665	0.99552	0	2.34434	1.40571	1.11329	-0.292423	0.927429	0.999819
ENSOCUT00000019039	ENSOCUG00000019039	RF00100	---	OtherNonCodingRNA	1.42753	0.999643	2.45817	0.99552	2.82223	2.6083	1.62845	2.14202	0.513568	0.502919	0.986021
ENSOCUT00000019036	ENSOCUG00000019036	RF00100	---	OtherNonCodingRNA	14.5254	14.7505	15.164	14.9169	15.4675	15.4548	14.8133	15.2797	0.466464	0.062347	0.695811
ENSOCUT00000019037	ENSOCUG00000019037	RF00001	---	OtherNonCodingRNA	0	0.999643	0	0	0	1.01405	0.333214	0.338016	0.00480181	0.992719	0.999819
ENSOCUT00000019526	ENSOCUG00000019526	RF00414	---	OtherNonCodingRNA	1.82162	1.99947	1.69938	2.57749	1.59655	2.02102	1.84015	2.06502	0.224864	0.716134	0.986021
ENSOCUT00000019520	ENSOCUG00000019520	RF00408	---	OtherNonCodingRNA	6.10002	6.32122	5.71959	5.84916	5.77191	5.93439	6.04694	5.85182	-0.195123	0.423788	0.986021
ENSOCUT00000024298	ENSOCUG00000021860	---	---	ProteinCodingRNA	9.18145	9.40443	9.17931	9.45864	9.29576	9.50568	9.25506	9.42003	0.164966	0.199554	0.935462
ENSOCUT00000019523	ENSOCUG00000019523	RF00191	---	OtherNonCodingRNA	1.42753	1.99947	1.69938	1.99327	3.18535	2.6083	1.70879	2.59564	0.886851	0.205015	0.938709
ENSOCUT00000033999	ENSOCUG00000029200	---	---	ProteinCodingRNA	5.46242	7.12858	7.78229	4.51498	7.21689	7.87333	6.7911	6.53507	-0.256027	0.992021	0.999819
ENSOCUT00000033998	ENSOCUG00000029451	---	---	ProteinCodingRNA	9.20436	9.22329	9.29222	9.46068	8.91212	8.91969	9.23996	9.0975	-0.142463	0.53669	0.986021
MSTRG.16631.2	---	---	---	Predicted_LncRNA	3.94146	4.45875	5.59095	4.84932	3.92308	4.55032	4.66372	4.44091	-0.222816	0.563444	0.986021
ENSOCUT00000033990	ENSOCUG00000029595	---	---	ProteinCodingRNA	2.13084	2.80674	2.45817	2.79967	2.33582	2.02102	2.46525	2.3855	-0.0797498	0.928356	0.999819
ENSOCUT00000033993	ENSOCUG00000010126	ST3GAL5	ST3 beta-galactoside alpha-2,3-sialyltransferase 5	ProteinCodingRNA	5.25463	0	0	7.95685	6.83737	0	1.75154	4.9314	3.17986	0.380034	0.986021
ENSOCUT00000033992	ENSOCUG00000017051	BPIFB1	BPI fold containing family B member 1	ProteinCodingRNA	1.42753	0	0	0	0	0	0.475843	0	-0.475843	0.68719	0.986021
ENSOCUT00000033995	ENSOCUG00000011938	TCTN1	tectonic family member 1	ProteinCodingRNA	8.31602	8.51104	8.01319	8.00787	8.01727	8.21274	8.28008	8.07929	-0.20079	0.25085	0.968372
ENSOCUT00000033994	ENSOCUG00000029410	---	---	ProteinCodingRNA	0	0	2.1281	1.99327	0	0	0.709366	0.664425	-0.0449406	0.964111	0.999819
ENSOCUT00000010680	ENSOCUG00000010684	---	---	OtherNonCodingRNA	1.42753	0	1.69938	1.57899	2.82223	3.34712	1.0423	2.58278	1.54048	0.0901069	0.767162
ENSOCUT00000031739	ENSOCUG00000023847	CEP57L1	centrosomal protein 57 like 1	ProteinCodingRNA	7.80775	7.85104	7.76748	7.99106	8.26046	8.18268	7.80876	8.14473	0.335977	0.020498	0.447969
ENSOCUT00000031738	ENSOCUG00000005856	PEX5	peroxisomal biogenesis factor 5	ProteinCodingRNA	10.1739	9.91964	9.67992	10.11	9.49911	9.59017	9.92449	9.73309	-0.191399	0.423407	0.986021
ENSOCUT00000031737	ENSOCUG00000026072	---	---	ProteinCodingRNA	0	0	2.1281	0	0	0	0.709366	0	-0.709366	0.516882	0.986021
ENSOCUT00000004387	ENSOCUG00000004390	FAM35A	family with sequence similarity 35 member A	ProteinCodingRNA	7.79683	8.39161	8.64367	7.79197	8.73497	8.61285	8.27737	8.37993	0.102562	0.72254	0.986021
ENSOCUT00000031735	ENSOCUG00000022100	AGAP3	ArfGAP with GTPase domain, ankyrin repeat and PH domain 3	ProteinCodingRNA	10.3477	10.5336	10.5137	10.5321	10.5757	10.4935	10.465	10.5338	0.0688218	0.470611	0.986021
MSTRG.16351.1	---	---	---	Predicted_LncRNA	3.58305	0	0	0	0	5.41962	1.19435	1.80654	0.612191	0.510506	0.986021
ENSOCUT00000031733	ENSOCUG00000021731	---	---	OtherNonCodingRNA	5.54307	5.42557	5.68849	5.63506	5.3023	5.95825	5.55238	5.63187	0.0794939	0.738586	0.986021
ENSOCUT00000031731	ENSOCUG00000027242	---	---	ProteinCodingRNA	4.35286	3.45878	4.55312	3.79902	4.60158	4.41896	4.12158	4.27319	0.151604	0.809855	0.986021
ENSOCUT00000004122	ENSOCUG00000004123	PLA2G3	phospholipase A2 group III	ProteinCodingRNA	10.2389	11.0647	11.3784	10.4515	12.2425	12.2812	10.894	11.6584	0.764424	0.0607252	0.687747
ENSOCUT00000001443	ENSOCUG00000001439	FAT1	FAT atypical cadherin 1	ProteinCodingRNA	14.5887	14.2835	14.3638	14.5637	14.2217	14.0326	14.412	14.2727	-0.139283	0.496685	0.986021
ENSOCUT00000001440	ENSOCUG00000001440	NOX3	NADPH oxidase 3	ProteinCodingRNA	2.13084	1.99947	2.1281	2.31475	0	0	2.08613	0.771584	-1.31455	0.42023	0.986021
ENSOCUT00000031590	ENSOCUG00000000051	DMXL1	Dmx like 1	ProteinCodingRNA	13.0481	12.8706	12.6595	12.9694	12.9197	12.7024	12.8594	12.8638	0.00442958	0.999097	0.999819
ENSOCUT00000004654	ENSOCUG00000004656	DOK1	docking protein 1	ProteinCodingRNA	6.54067	7.08675	7.26526	6.48298	7.37479	7.48724	6.96423	7.115	0.150774	0.600711	0.986021
ENSOCUT00000004127	ENSOCUG00000004131	ZBTB14	zinc finger and BTB domain containing 14	ProteinCodingRNA	9.56777	9.52872	9.49007	9.48689	9.65937	9.49757	9.52885	9.54794	0.0190915	0.841614	0.989085
ENSOCUT00000004124	ENSOCUG00000004115	FUK	fucokinase	ProteinCodingRNA	9.28278	8.79695	8.63146	8.91586	8.76213	8.70385	8.90373	8.79395	-0.109784	0.520569	0.986021
ENSOCUT00000004657	ENSOCUG00000004659	CCNH	cyclin H	ProteinCodingRNA	9.38477	9.2985	9.28444	9.42149	8.89075	9.05582	9.32257	9.12268	-0.199886	0.289761	0.979983
ENSOCUT00000001448	ENSOCUG00000027950	---	---	ProteinCodingRNA	2.95595	1.99947	2.1281	2.79967	0	0	2.36117	0.933222	-1.42795	0.481329	0.986021
ENSOCUT00000027474	ENSOCUG00000025210	RF00421	---	OtherNonCodingRNA	0	2.58437	1.69938	0.99552	1.0087	1.60366	1.42791	1.20263	-0.225288	0.602241	0.986021
ENSOCUT00000027473	ENSOCUG00000025209	RF00100	---	OtherNonCodingRNA	6.71323	5.9993	6.25351	6.48298	6.79854	6.75562	6.32201	6.67905	0.357034	0.240097	0.959884
ENSOCUT00000027470	ENSOCUG00000027886	---	---	ProteinCodingRNA	0	1.58449	0	0	0	0	0.528162	0	-0.528162	0.648025	0.986021
ENSOCUT00000010581	ENSOCUG00000010583	FBP2	fructose-1,6-bisphosphatase isozyme 2	ProteinCodingRNA	0	2.58437	1.69938	2.79967	3.01518	2.6083	1.42791	2.80772	1.3798	0.226415	0.951724
ENSOCUT00000002434	ENSOCUG00000002436	TEX30	testis expressed 30	ProteinCodingRNA	7.23412	6.47503	6.78147	6.9453	6.83737	6.38518	6.83021	6.72261	-0.107596	0.677681	0.986021
ENSOCUT00000002435	ENSOCUG00000002433	FBXO41	F-box protein 41	ProteinCodingRNA	6.44597	0	6.54151	5.23919	6.10455	6.61264	4.32916	5.98546	1.6563	0.884786	0.99504
ENSOCUT00000002433	ENSOCUG00000002434	RBM15	RNA binding motif protein 15	ProteinCodingRNA	10.1256	9.99929	10.0324	10.0272	9.84069	9.87656	10.0524	9.91482	-0.137616	0.17768	0.914954
ENSOCUT00000002431	ENSOCUG00000002432	KDELC1	KDEL motif containing 1	ProteinCodingRNA	9.89669	9.82584	9.99476	9.66699	9.8375	10.3899	9.90576	9.96479	0.0590313	0.670621	0.986021
ENSOCUT00000032646	ENSOCUG00000028651	RF00100	---	OtherNonCodingRNA	0	0	0	1.57899	0	1.01405	0	0.864345	0.864345	0.518943	0.986021
MSTRG.8016.1	---	---	---	Predicted_LncRNA	8.39419	8.23769	8.28676	8.49488	9.20466	8.74557	8.30621	8.81504	0.508823	0.0150432	0.391543
MSTRG.19098.2	---	---	---	Predicted_LncRNA	0	8.90618	0	0	0	0	2.96873	0	-2.96873	1.26426e-09	1.1095e-06
ENSOCUT00000002438	ENSOCUG00000002438	DCAF10	DDB1 and CUL4 associated factor 10	ProteinCodingRNA	8.87891	9.03821	8.73021	9.05174	8.84067	9.03353	8.88244	8.97531	0.0928712	0.525672	0.986021
ENSOCUT00000002439	ENSOCUG00000002439	ACVR1	activin A receptor type 1	ProteinCodingRNA	10.9257	11.032	10.8148	11.0969	10.6853	10.7004	10.9242	10.8275	-0.0966403	0.580082	0.986021
ENSOCUT00000014259	ENSOCUG00000014260	TACO1	translational activator of cytochrome c oxidase I	ProteinCodingRNA	7.15935	7.36561	7.27576	7.56093	7.30263	7.10457	7.26691	7.32271	0.0558043	0.73651	0.986021
ENSOCUT00000005384	ENSOCUG00000005385	---	---	ProteinCodingRNA	10.817	11.4203	11.2471	11.4759	11.2563	11.1897	11.1615	11.3073	0.145807	0.493182	0.986021
ENSOCUT00000005386	ENSOCUG00000005379	ANXA6	annexin A6	ProteinCodingRNA	11.5006	11.4891	11.8509	11.1747	11.5202	11.8828	11.6135	11.5259	-0.0876424	0.752129	0.986021
ENSOCUT00000005833	ENSOCUG00000005831	RPN2	ribophorin II	ProteinCodingRNA	12.1331	12.1755	12.1893	12.0635	11.9355	12.2337	12.166	12.0776	-0.0883893	0.441729	0.986021
ENSOCUT00000005383	ENSOCUG00000005098	STK10	serine/threonine kinase 10	ProteinCodingRNA	6.77018	6.93003	9.70927	0	6.6896	6.95847	7.80316	4.54936	-3.2538	0.235252	0.956919
ENSOCUT00000030120	ENSOCUG00000025179	---	---	ProteinCodingRNA	0	2.80674	0	0	0	0	0.935581	0	-0.935581	0.385384	0.986021
ENSOCUT00000014251	ENSOCUG00000014252	MAPKAPK2	mitogen-activated protein kinase-activated protein kinase 2	ProteinCodingRNA	12.589	12.1848	11.7867	12.5606	11.4946	11.6417	12.1868	11.899	-0.287856	0.469328	0.986021
ENSOCUT00000014250	ENSOCUG00000014250	TRDC	T cell receptor delta constant	ProteinCodingRNA	4.62398	6.06539	5.06997	5.12057	5.37447	6.15685	5.25311	5.55063	0.297515	0.643848	0.986021
ENSOCUT00000014253	ENSOCUG00000014251	WDR31	WD repeat domain 31	ProteinCodingRNA	6.23561	5.90619	6.96137	6.18097	5.92394	6.23704	6.36772	6.11399	-0.253736	0.374981	0.986021
MSTRG.17617.1	---	---	---	Predicted_LncRNA	7.43767	6.94181	7.35712	7.14084	7.77881	7.40283	7.24553	7.44083	0.195293	0.434327	0.986021
ENSOCUT00000005389	ENSOCUG00000005392	CNTF	ciliary neurotrophic factor	ProteinCodingRNA	6.41773	6.64315	6.70584	5.92191	7.28401	7.2176	6.58891	6.80784	0.218934	0.402273	0.986021
ENSOCUT00000005838	ENSOCUG00000005841	GHRH	growth hormone releasing hormone	ProteinCodingRNA	0.883565	0	1.69938	0.99552	3.01518	2.6083	0.86098	2.20634	1.34535	0.143683	0.874476
ENSOCUT00000028595	ENSOCUG00000025926	RF00108	---	OtherNonCodingRNA	1.42753	0.999643	2.1281	0.99552	1.0087	1.01405	1.51842	1.00609	-0.512335	0.49587	0.986021
ENSOCUT00000028596	ENSOCUG00000023956	HOXD9	homeobox D9	ProteinCodingRNA	3.24021	3.45878	4.55312	3.89852	5.1043	4.93393	3.7507	4.64558	0.894879	0.131522	0.85746
MSTRG.17800.1	---	---	---	Predicted_LncRNA	3.94146	4.69975	3.74004	5.20072	3.82346	3.34712	4.12709	4.12377	-0.00331892	0.804594	0.986021
ENSOCUT00000028046	ENSOCUG00000022792	---	---	ProteinCodingRNA	6.23561	5.85728	5.94685	6.2006	5.4432	5.75536	6.01325	5.79972	-0.213526	0.539318	0.986021
ENSOCUT00000028045	ENSOCUG00000025540	NFYC	nuclear transcription factor Y subunit gamma	ProteinCodingRNA	10.418	10.5091	10.6611	10.4839	10.5202	10.3954	10.5294	10.4665	-0.0629147	0.542076	0.986021
ENSOCUT00000028735	ENSOCUG00000026316	---	---	ProteinCodingRNA	0	0	2.1281	1.57899	2.59943	0	0.709366	1.3928	0.683439	0.637814	0.986021
ENSOCUT00000025521	ENSOCUG00000022085	---	---	ProteinCodingRNA	5.01178	5.12859	4.91738	5.27666	5.82439	5.83482	5.01925	5.64529	0.62604	0.0441293	0.614223
MSTRG.8821.1	---	---	---	Predicted_LncRNA	6.04569	5.88194	5.59095	5.38356	6.60212	6.38518	5.83953	6.12362	0.28409	0.362895	0.986021
ENSOCUT00000015488	ENSOCUG00000015488	COPRS	coordinator of PRMT5 and differentiation stimulator	ProteinCodingRNA	8.04777	8.42974	8.54295	7.89193	7.85015	8.36327	8.34015	8.03512	-0.305035	0.19521	0.928972
ENSOCUT00000025528	ENSOCUG00000026083	FAM219A	family with sequence similarity 219 member A	ProteinCodingRNA	4.67259	5.08677	3.96434	4.07902	5.06121	5.48676	4.57457	4.87566	0.301096	0.524459	0.986021
ENSOCUT00000002389	ENSOCUG00000002389	UFC1	ubiquitin-fold modifier conjugating enzyme 1	ProteinCodingRNA	10.5376	10.5606	10.4421	10.5769	10.6755	10.7903	10.5134	10.6809	0.167527	0.088205	0.762039
ENSOCUT00000001811	ENSOCUG00000001811	---	---	OtherNonCodingRNA	0	2.58437	2.45817	1.99327	2.82223	3.19481	1.68085	2.6701	0.989257	0.446015	0.986021
ENSOCUT00000012366	ENSOCUG00000012366	SLC25A46	solute carrier family 25 member 46	ProteinCodingRNA	8.50906	7.40868	8.47622	8.80803	8.90909	7.49541	8.13132	8.40418	0.272854	0.477657	0.986021
ENSOCUT00000007653	ENSOCUG00000007657	FAM174A	family with sequence similarity 174 member A	ProteinCodingRNA	5.08543	5.61401	5.83769	4.7987	5.33884	4.67071	5.51238	4.93608	-0.576296	0.131365	0.85746
ENSOCUT00000012364	ENSOCUG00000012369	ANKRD37	ankyrin repeat domain 37	ProteinCodingRNA	6.62953	7.25668	7.16714	6.56098	7.07249	7.29457	7.01778	6.97601	-0.0417715	0.911684	0.999819
ENSOCUT00000002380	ENSOCUG00000002382	---	---	ProteinCodingRNA	6.8033	6.55388	6.21037	6.84908	6.22656	6.15685	6.52252	6.41083	-0.111687	0.747346	0.986021
ENSOCUT00000002381	ENSOCUG00000002380	NIT1	nitrilase 1	ProteinCodingRNA	9.94077	9.94327	10.0493	9.83653	9.93767	9.96604	9.97779	9.91341	-0.0643737	0.488611	0.986021
ENSOCUT00000012369	ENSOCUG00000012368	NDUFS1	NADH:ubiquinone oxidoreductase core subunit S1	ProteinCodingRNA	11.3583	11.1427	11.0819	11.2264	11.1193	11.2128	11.1943	11.1862	-0.00810916	0.907863	0.999808
ENSOCUT00000012368	ENSOCUG00000012378	SCG2	secretogranin II	ProteinCodingRNA	1.42753	1.58449	2.1281	2.57749	3.60086	4.34851	1.71337	3.50895	1.79558	0.0107326	0.338842
MSTRG.14049.1	---	---	---	Predicted_LncRNA	7.63455	8.04368	8.1393	7.86143	8.51714	8.59775	7.93918	8.32544	0.386262	0.126003	0.846528
ENSOCUT00000002386	ENSOCUG00000002386	LYAR	Ly1 antibody reactive	ProteinCodingRNA	7.9914	7.74748	7.51614	7.83656	7.35708	7.15705	7.75167	7.45023	-0.301446	0.263666	0.970468
ENSOCUT00000017781	ENSOCUG00000017780	EDNRB	endothelin receptor type B precursor	ProteinCodingRNA	10.1365	9.75083	9.12807	10.643	7.78544	7.86705	9.67179	8.76516	-0.906637	0.741694	0.986021
MSTRG.10435.48	---	---	---	Predicted_LncRNA	0.883565	4.69975	0	10.9903	0	0	1.86111	3.66344	1.80234	0.091796	0.773379
MSTRG.10435.49	---	---	---	Predicted_LncRNA	12.2937	11.435	8.68365	12.3101	5.26481	5.23667	10.8041	7.60387	-3.20022	0.726149	0.986021
ENSOCUT00000014079	ENSOCUG00000014056	DOCK5	dedicator of cytokinesis 5	ProteinCodingRNA	9.48002	9.7525	9.8353	9.49883	9.91517	10.2239	9.68928	9.87931	0.190032	0.334999	0.986021
ENSOCUT00000011558	ENSOCUG00000011559	---	---	ProteinCodingRNA	0	0	1.08665	0	0	0	0.362216	0	-0.362216	0.820752	0.986021
ENSOCUT00000011555	ENSOCUG00000011557	---	---	ProteinCodingRNA	6.87775	6.42556	7.1213	6.70536	6.75865	6.64239	6.8082	6.70213	-0.106072	0.601465	0.986021
ENSOCUT00000030465	ENSOCUG00000012088	EMX2	empty spiracles homeobox 2	ProteinCodingRNA	8.17131	8.24246	8.49432	7.79197	8.37484	8.96454	8.3027	8.37712	0.0744194	0.643335	0.986021
ENSOCUT00000011557	ENSOCUG00000011556	KCTD18	potassium channel tetramerization domain containing 18	ProteinCodingRNA	8.98135	8.61031	8.49432	8.41312	8.42668	8.60532	8.69533	8.48171	-0.213622	0.210244	0.939884
ENSOCUT00000011503	ENSOCUG00000011507	---	---	ProteinCodingRNA	8.00095	7.96507	7.83294	7.89193	7.92416	8.09395	7.93299	7.97001	0.0370245	0.805503	0.986021
MSTRG.10435.46	---	---	---	Predicted_LncRNA	11.3827	10.398	10.1412	10.2787	8.37484	7.69316	10.6406	8.78225	-1.8584	0.0651617	0.705753
ENSOCUT00000011550	ENSOCUG00000011552	YEATS4	YEATS domain containing 4	ProteinCodingRNA	6.5537	6.08676	6.54151	6.89799	6.22656	5.48676	6.39399	6.20377	-0.190219	0.820535	0.986021
ENSOCUT00000012445	ENSOCUG00000012449	HCLS1	hematopoietic cell-specific Lyn substrate 1	ProteinCodingRNA	7.01602	7.74076	8.24461	7.49092	8.01727	8.16742	7.66713	7.89187	0.22474	0.636737	0.986021
ENSOCUT00000011552	ENSOCUG00000011551	ZBTB48	zinc finger and BTB domain containing 48	ProteinCodingRNA	8.89692	9.1642	9.08692	8.98822	9.02012	8.94975	9.04935	8.98603	-0.0633165	0.590882	0.986021
ENSOCUT00000014783	ENSOCUG00000014791	---	---	ProteinCodingRNA	4.35286	4.39164	4.80587	3.31385	5.22633	4.98127	4.51679	4.50715	-0.00963974	0.74085	0.986021
ENSOCUT00000014781	ENSOCUG00000014776	SLC26A8	solute carrier family 26 member 8	ProteinCodingRNA	4.62398	5.90619	6.2321	5.20072	5.54053	5.80882	5.58743	5.51669	-0.0707361	0.693139	0.986021
ENSOCUT00000014787	ENSOCUG00000014789	AMZ2	archaelysin family metallopeptidase 2	ProteinCodingRNA	10.7556	10.5316	10.4583	10.6258	10.3561	10.3454	10.5818	10.4424	-0.139429	0.325538	0.986021
MSTRG.11451.1	---	---	---	Predicted_LncRNA	6.85687	6.49115	6.14314	7.06791	5.79839	6.23704	6.49705	6.36778	-0.129273	0.878856	0.993824
ENSOCUT00000001205	ENSOCUG00000001206	---	---	ProteinCodingRNA	0	0	2.45817	1.57899	0	1.60366	0.819391	1.06088	0.241492	0.958507	0.999819
ENSOCUT00000026351	ENSOCUG00000021783	---	---	OtherNonCodingRNA	3.68134	3.16929	3.32054	2.57749	2.82223	4.55032	3.39039	3.31668	-0.0737116	0.789983	0.986021
ENSOCUT00000016785	ENSOCUG00000016787	SERPINB5	serpin family B member 5	ProteinCodingRNA	13.8583	13.968	13.7769	14.0387	13.6884	13.8495	13.8677	13.8589	-0.00880443	0.97753	0.999819
ENSOCUT00000016784	ENSOCUG00000016786	---	---	ProteinCodingRNA	2.38533	2.99938	0	0	2.59943	3.34712	1.7949	1.98218	0.187279	0.838232	0.988354
ENSOCUT00000016787	ENSOCUG00000016791	CLEC1A	C-type lectin domain family 1 member A	ProteinCodingRNA	6.96814	7.41714	6.99988	6.746	7.64661	8.10468	7.12839	7.49909	0.370704	0.224634	0.951724
ENSOCUT00000016780	ENSOCUG00000016782	---	---	OtherNonCodingRNA	7.45167	7.75418	8.05036	7.5984	8.11003	8.62408	7.75207	8.11084	0.358772	0.207615	0.938709
ENSOCUT00000016783	ENSOCUG00000016784	BCAS2	BCAS2, pre-mRNA processing factor	ProteinCodingRNA	9.49192	9.58237	9.53447	9.67228	9.59475	9.47087	9.53625	9.5793	0.0430419	0.658978	0.986021
ENSOCUT00000016782	ENSOCUG00000016783	DTWD1	DTW domain containing 1	ProteinCodingRNA	7.81859	8.19405	8.16777	7.68456	8.56419	8.69323	8.06013	8.31399	0.253858	0.307242	0.98473
ENSOCUT00000016789	ENSOCUG00000016788	FAM114A2	family with sequence similarity 114 member A2	ProteinCodingRNA	10.6135	10.77	10.6909	10.667	11.0334	10.9068	10.6914	10.8691	0.177638	0.160351	0.89695
ENSOCUT00000012095	ENSOCUG00000012099	ETFRF1	electron transfer flavoprotein regulatory factor 1	ProteinCodingRNA	8.22932	8.72039	8.69543	8.70185	8.643	8.53171	8.54838	8.62552	0.0771422	0.726652	0.986021
MSTRG.7756.1	---	---	---	Predicted_LncRNA	7.226	6.68579	6.43311	6.9911	7.05063	6.78259	6.78164	6.94144	0.159805	0.667766	0.986021
ENSOCUT00000032914	ENSOCUG00000028919	RF00001	---	OtherNonCodingRNA	3.24021	1.99947	3.14838	3.16195	2.59943	3.61062	2.79602	3.124	0.32798	0.666888	0.986021
ENSOCUT00000012096	ENSOCUG00000012094	TRAM2	translocation associated membrane protein 2	ProteinCodingRNA	8.74327	8.81627	9.02913	8.52633	8.43514	8.9821	8.86289	8.64786	-0.215033	0.321219	0.986021
ENSOCUT00000012091	ENSOCUG00000012092	PSMA2	proteasome subunit alpha 2	ProteinCodingRNA	10.0598	9.89562	9.84415	10.0625	9.6791	9.86714	9.93317	9.86958	-0.0635971	0.684555	0.986021
ENSOCUT00000032913	ENSOCUG00000028918	RF00322	---	OtherNonCodingRNA	3.85986	2.80674	3.14838	3.45128	4.01626	4.1138	3.27166	3.86044	0.588783	0.333896	0.986021
ENSOCUT00000012093	ENSOCUG00000012098	---	---	ProteinCodingRNA	7.9914	8.03821	7.62692	8.09435	8.1721	8.19277	7.88551	8.15307	0.267564	0.132998	0.860647
ENSOCUT00000012092	ENSOCUG00000012093	SLC36A1	proton-coupled amino acid transporter 1	ProteinCodingRNA	10.5891	10.4012	9.66002	10.8964	9.3004	9.46879	10.2168	9.88854	-0.328263	0.675257	0.986021
ENSOCUT00000012099	ENSOCUG00000012102	---	---	OtherNonCodingRNA	5.22234	5.0437	4.15842	4.38377	4.18631	4.98127	4.80815	4.51711	-0.291039	0.478399	0.986021
ENSOCUT00000012098	ENSOCUG00000012100	---	---	OtherNonCodingRNA	5.08543	5.12859	4.06464	4.45087	4.87473	4.88499	4.75956	4.73686	-0.0226957	0.825662	0.986021
ENSOCUT00000032918	ENSOCUG00000028923	RF00001	---	OtherNonCodingRNA	1.42753	0.999643	1.69938	1.57899	2.01302	3.19481	1.37552	2.26227	0.886756	0.221448	0.949977
ENSOCUT00000032919	ENSOCUG00000028924	RF00026	---	OtherNonCodingRNA	1.42753	1.58449	2.72661	2.31475	3.18535	2.6083	1.91288	2.7028	0.789924	0.325499	0.986021
ENSOCUT00000007494	ENSOCUG00000007492	LMOD1	leiomodin 1	ProteinCodingRNA	8.98856	8.87273	9.21521	7.5685	10.7324	9.78615	9.0255	9.36236	0.336861	0.182185	0.914954
MSTRG.9243.1	---	---	---	Predicted_LncRNA	5.71536	5.42557	5.92033	5.45066	6.42653	6.75562	5.68709	6.21094	0.523851	0.136425	0.867037
MSTRG.1447.1	---	---	---	Predicted_LncRNA	6.57942	6.02167	6.2954	6.25793	7.26515	7.39412	6.29883	6.9724	0.673571	0.0483893	0.635979
ENSOCUT00000032715	ENSOCUG00000028720	RF00001	---	OtherNonCodingRNA	0	0	1.08665	0	0	0	0.362216	0	-0.362216	0.820752	0.986021
MSTRG.9311.1	---	---	---	Predicted_LncRNA	12.8054	11.5649	11.4369	11.7468	11.489	12.8805	11.9357	12.0387	0.103032	0.839584	0.988731
ENSOCUT00000033367	ENSOCUG00000029561	---	---	ProteinCodingRNA	0	0	0	1.99327	0	0	0	0.664425	0.664425	0.537999	0.986021
ENSOCUT00000005521	ENSOCUG00000005521	GPBAR1	G-protein coupled bile acid receptor 1	ProteinCodingRNA	3.10507	3.45878	3.14838	3.31385	5.22633	5.19712	3.23741	4.5791	1.34169	0.0145637	0.386833
ENSOCUT00000005520	ENSOCUG00000005519	ARMC12	armadillo repeat containing 12	ProteinCodingRNA	3.47757	4.16925	4.74671	2.99215	6.63187	6.78259	4.13118	5.46887	1.3377	0.0232945	0.471837
ENSOCUT00000005523	ENSOCUG00000005523	AMDHD1	amidohydrolase domain containing 1	ProteinCodingRNA	4.67259	5.08677	4.91738	4.57636	5.68943	5.55092	4.89225	5.27224	0.379991	0.281538	0.979983
ENSOCUT00000017115	ENSOCUG00000017112	PIP4K2A	phosphatidylinositol-5-phosphate 4-kinase type 2 alpha	ProteinCodingRNA	10.1147	10.3291	10.4467	10.1216	10.2521	10.5016	10.2968	10.2918	-0.00501743	0.989021	0.999819
ENSOCUT00000030644	ENSOCUG00000026509	---	---	ProteinCodingRNA	0	1.58449	3.32054	0	1.0087	3.72627	1.63501	1.57832	-0.0566884	0.885114	0.995263
ENSOCUT00000005524	ENSOCUG00000005524	TMBIM1	transmembrane BAX inhibitor motif containing 1	ProteinCodingRNA	11.9505	12.1443	12.3273	12.0466	12.3757	12.1184	12.1407	12.1803	0.0395787	0.801848	0.986021
ENSOCUT00000005527	ENSOCUG00000005529	GTPBP2	GTP binding protein 2	ProteinCodingRNA	10.3681	10.2801	9.7475	10.5993	9.34599	9.71618	10.1319	9.88715	-0.244732	0.622903	0.986021
ENSOCUT00000005526	ENSOCUG00000005526	ABHD18	abhydrolase domain containing 18	ProteinCodingRNA	9.00051	8.98513	8.88911	8.89191	8.7038	8.89209	8.95825	8.82927	-0.128985	0.274671	0.977504
ENSOCUT00000005529	ENSOCUG00000005528	HAL	histidine ammonia-lyase	ProteinCodingRNA	12.1942	14.5421	15.1294	13.7314	13.9058	14.0484	13.9552	13.8952	-0.0600293	0.409159	0.986021
ENSOCUT00000020127	ENSOCUG00000020127	---	---	OtherNonCodingRNA	1.42753	0.999643	0	0.99552	0	0	0.809058	0.33184	-0.477218	0.623658	0.986021
MSTRG.7525.1	---	---	---	Predicted_LncRNA	7.95256	7.91218	8.11611	8.16598	7.62458	7.51966	7.99362	7.77008	-0.223542	0.390669	0.986021
ENSOCUT00000020123	ENSOCUG00000020123	---	---	OtherNonCodingRNA	4.35286	4.32125	4.06464	4.3134	4.92366	4.19635	4.24625	4.4778	0.231553	0.54075	0.986021
ENSOCUT00000001160	ENSOCUG00000001160	HOXC9	homeobox C9	ProteinCodingRNA	0	0	0	2.79967	0	0	0	0.933222	0.933222	0.381268	0.986021
ENSOCUT00000010695	ENSOCUG00000010697	---	---	ProteinCodingRNA	9.5885	9.71181	9.59861	9.70871	9.53104	9.27347	9.63297	9.50441	-0.128566	0.425792	0.986021
ENSOCUT00000007397	ENSOCUG00000007394	ADCY6	adenylate cyclase 6	ProteinCodingRNA	11.3377	11.537	11.6471	11.2126	11.7537	11.6509	11.5073	11.5391	0.0318213	0.805039	0.986021
ENSOCUT00000017522	ENSOCUG00000017522	TGS1	trimethylguanosine synthase 1	ProteinCodingRNA	8.91218	9.17671	9.05984	9.07053	9.22432	9.05582	9.04958	9.11689	0.067313	0.605073	0.986021
ENSOCUT00000017523	ENSOCUG00000017526	CCDC43	coiled-coil domain containing 43	ProteinCodingRNA	6.70157	6.69973	7.10961	6.62047	6.60212	6.31301	6.83697	6.51187	-0.325101	0.164461	0.903179
ENSOCUT00000010200	ENSOCUG00000010200	PMPCB	peptidase, mitochondrial processing beta subunit	ProteinCodingRNA	10.5498	10.3065	10.192	10.2294	10.2022	10.1391	10.3494	10.1902	-0.159202	0.193636	0.928347
ENSOCUT00000010201	ENSOCUG00000010191	---	---	ProteinCodingRNA	11.2363	11.2203	11.142	11.2619	11.2145	11.1534	11.1995	11.2099	0.0104253	0.893547	0.996931
ENSOCUT00000010206	ENSOCUG00000010208	---	---	ProteinCodingRNA	9.43494	9.2962	9.34304	9.52826	9.34374	9.08319	9.35806	9.3184	-0.0396652	0.846601	0.989085
ENSOCUT00000017527	ENSOCUG00000017531	---	---	ProteinCodingRNA	5.25463	5.64316	5.52206	5.51478	5.6317	5.88547	5.47328	5.67732	0.204035	0.471762	0.986021
ENSOCUT00000017524	ENSOCUG00000017524	AGBL2	ATP/GTP binding protein like 2	ProteinCodingRNA	3.85986	0	3.96434	3.45128	2.33582	3.0245	2.60807	2.9372	0.329129	0.725309	0.986021
ENSOCUT00000017525	ENSOCUG00000017530	SLC10A5	solute carrier family 10 member 5	ProteinCodingRNA	4.16177	4.52288	3.6133	4.07902	2.33582	3.61062	4.09932	3.34182	-0.7575	0.293209	0.980264
ENSOCUT00000017258	ENSOCUG00000017255	ERGIC2	ERGIC and golgi 2	ProteinCodingRNA	9.62292	9.64854	9.69369	9.60206	9.57574	9.71092	9.65505	9.62957	-0.0254774	0.794237	0.986021
ENSOCUT00000000927	ENSOCUG00000000927	ADAMTSL4	ADAMTS like 4	ProteinCodingRNA	10.7243	11.1234	11.225	10.6249	11.1696	11.4144	11.0242	11.0696	0.0454287	0.785478	0.986021
ENSOCUT00000017528	ENSOCUG00000017527	LRRIQ1	leucine rich repeats and IQ motif containing 1	ProteinCodingRNA	7.35073	6.26608	6.09652	6.92184	6.37468	6.51951	6.57111	6.60534	0.0342322	0.874847	0.993072
ENSOCUT00000017529	ENSOCUG00000017525	MED13L	mediator complex subunit 13 like	ProteinCodingRNA	13.5836	13.6372	13.6551	13.7168	14.0621	13.909	13.6253	13.896	0.270688	0.0262683	0.496886
ENSOCUT00000000922	ENSOCUG00000000922	NUBP1	nucleotide binding protein 1	ProteinCodingRNA	9.40289	9.48713	9.61524	9.57035	9.59852	9.58251	9.50175	9.5838	0.0820414	0.426168	0.986021
ENSOCUT00000000923	ENSOCUG00000000923	TVP23A	trans-golgi network vesicle protein 23 homolog A	ProteinCodingRNA	2.38533	1.99947	2.1281	2.31475	2.59943	3.83334	2.17096	2.91584	0.744874	0.227505	0.952162
ENSOCUT00000000920	ENSOCUG00000000919	ADGRA3	adhesion G protein-coupled receptor A3	ProteinCodingRNA	11.8642	11.3458	10.9789	11.8575	10.7946	10.9014	11.3963	11.1845	-0.21178	0.617582	0.986021
ENSOCUT00000000921	ENSOCUG00000000921	MYO19	myosin XIX	ProteinCodingRNA	10.7257	10.77	10.867	10.8675	11.0881	10.8441	10.7875	10.9333	0.145718	0.177959	0.914954
ENSOCUT00000013412	ENSOCUG00000013416	CCL1	C-C motif chemokine ligand 1	ProteinCodingRNA	1.82162	1.99947	1.69938	1.99327	5.50881	5.67126	1.84015	4.39112	2.55096	0.000607222	0.0656947
ENSOCUT00000013413	ENSOCUG00000013411	---	---	ProteinCodingRNA	9.96047	9.91218	10.0043	9.88282	10.0644	10.0434	9.95897	9.99687	0.0379006	0.68286	0.986021
ENSOCUT00000001319	ENSOCUG00000001319	SREK1	splicing regulatory glutamic acid and lysine rich protein 1	ProteinCodingRNA	10.8727	10.9484	11.0714	10.8934	11.0617	10.9646	10.9642	10.9732	0.00906167	0.928864	0.999819
ENSOCUT00000015995	ENSOCUG00000015999	---	---	ProteinCodingRNA	0	0	2.1281	0	0	0	0.709366	0	-0.709366	0.516882	0.986021
ENSOCUT00000013419	ENSOCUG00000013422	KCNJ1	potassium voltage-gated channel subfamily J member 1	ProteinCodingRNA	0	0	0	0	3.60086	3.72627	0	2.44238	2.44238	0.021631	0.456359
MSTRG.8780.1	---	---	---	Predicted_LncRNA	9.00526	8.82901	8.71871	9.08644	8.63935	8.57864	8.851	8.76814	-0.0828546	0.716932	0.986021
MSTRG.5634.1	---	---	---	Predicted_LncRNA	10.4126	10.2209	10.5745	10.4484	10.9766	10.7456	10.4026	10.7235	0.320899	0.0682472	0.712719
MSTRG.7110.2	---	---	---	Predicted_LncRNA	9.61672	9.68754	9.35051	9.95104	9.52709	9.46671	9.55159	9.64828	0.0966915	0.572712	0.986021
ENSOCUT00000024578	ENSOCUG00000024037	---	---	ProteinCodingRNA	8.22932	8.32122	7.63509	8.69149	8.43092	8.06678	8.06188	8.39639	0.334515	0.220996	0.949977
ENSOCUT00000007398	ENSOCUG00000007398	DR1	down-regulator of transcription 1	ProteinCodingRNA	9.46285	9.11303	9.13096	9.39405	9.35047	8.95864	9.23562	9.23439	-0.00122798	0.993837	0.999819
ENSOCUT00000009264	ENSOCUG00000009260	PLCH1	phospholipase C eta 1	ProteinCodingRNA	7.25821	6.52286	6.04833	5.63506	5.6317	6.41995	6.6098	5.89557	-0.71423	0.0772281	0.737491
ENSOCUT00000017354	ENSOCUG00000017353	MORC2	MORC family CW-type zinc finger 2	ProteinCodingRNA	11.0197	10.944	10.8469	11.0943	11.0334	10.8719	10.9369	10.9999	0.0630159	0.545823	0.986021
MSTRG.13581.1	---	---	---	Predicted_LncRNA	3.77336	4.39164	4.74671	4.7987	4.40884	4.67071	4.3039	4.62608	0.322181	0.495632	0.986021
ENSOCUT00000016120	ENSOCUG00000016114	AFAP1L1	actin filament associated protein 1 like 1	ProteinCodingRNA	8.39781	9.09995	9.09584	8.03545	8.78217	9.07503	8.86453	8.63089	-0.233647	0.529412	0.986021
ENSOCUT00000016122	ENSOCUG00000016129	---	---	ProteinCodingRNA	8.29677	8.10258	7.96857	8.09435	8.24128	7.98785	8.12264	8.10783	-0.0148136	0.90128	0.998442
MSTRG.4854.1	---	---	---	Predicted_LncRNA	10.8498	10.5297	10.6246	10.701	10.7478	10.703	10.668	10.7173	0.0492314	0.718465	0.986021
ENSOCUT00000016126	ENSOCUG00000016132	KRT19	keratin 19	ProteinCodingRNA	4.52156	5.75419	5.80906	4.94551	5.14613	5.80882	5.3616	5.30015	-0.0614502	0.811193	0.986021
ENSOCUT00000010801	ENSOCUG00000010806	AP1S3	adaptor related protein complex 1 sigma 3 subunit	ProteinCodingRNA	4.41131	4.7542	3.32054	4.84932	2.33582	2.34434	4.16202	3.17649	-0.985527	0.500102	0.986021
ENSOCUT00000025436	ENSOCUG00000022187	---	---	ProteinCodingRNA	4.52156	5.52286	6.37569	4.69181	6.18702	5.3492	5.47337	5.40934	-0.0640278	0.844889	0.989085
ENSOCUT00000010804	ENSOCUG00000010803	PGM3	phosphoglucomutase 3	ProteinCodingRNA	10.039	9.7937	9.67199	9.77076	9.80848	10.2471	9.83491	9.94212	0.107201	0.542673	0.986021
ENSOCUT00000010805	ENSOCUG00000010801	PPEF1	protein phosphatase with EF-hand domain 1	ProteinCodingRNA	5.25463	6.75418	6.9483	5.23919	4.77159	5.55092	6.31904	5.18723	-1.1318	0.0134644	0.371188
ENSOCUT00000010806	ENSOCUG00000010810	NENF	neudesin neurotrophic factor	ProteinCodingRNA	8.16282	8.48713	8.56023	7.95685	8.43514	8.40726	8.40339	8.26642	-0.13698	0.533028	0.986021
ENSOCUT00000002350	ENSOCUG00000002349	CFAP45	cilia and flagella associated protein 45	ProteinCodingRNA	6.04569	5.85728	4.8627	4.7987	4.87473	4.02623	5.58856	4.56655	-1.02201	0.0218884	0.456983
ENSOCUT00000009747	ENSOCUG00000009743	MTMR4	myotubularin related protein 4	ProteinCodingRNA	11.0688	10.9708	11.0909	10.8775	11.1048	10.9341	11.0435	10.9721	-0.071368	0.498263	0.986021
MSTRG.19210.1	---	---	---	Predicted_LncRNA	3.24021	5.42557	3.96434	5.07875	4.47599	4.67071	4.21004	4.74182	0.531777	0.681653	0.986021
ENSOCUT00000024735	ENSOCUG00000022834	---	---	OtherNonCodingRNA	2.38533	0	1.08665	0	2.01302	1.01405	1.15733	1.00902	-0.148303	0.826458	0.986124
ENSOCUT00000024730	ENSOCUG00000023147	PDLIM4	PDZ and LIM domain protein 4	ProteinCodingRNA	1.42753	0	0	0	6.16684	0	0.475843	2.05561	1.57977	0.167816	0.906963
ENSOCUT00000024732	ENSOCUG00000023459	---	---	OtherNonCodingRNA	0	0	0	0.99552	1.0087	0	0	0.668072	0.668072	0.640115	0.986021
ENSOCUT00000013579	ENSOCUG00000013579	CCDC150	coiled-coil domain containing 150	ProteinCodingRNA	4.57368	4.16925	2.45817	5.07875	3.71645	2.6083	3.7337	3.80117	0.067467	0.850255	0.990131
ENSOCUT00000033200	ENSOCUG00000003610	FMO3	Dimethylaniline monooxygenase	ProteinCodingRNA	0	0	2.1281	0	2.01302	1.01405	0.709366	1.00902	0.299659	0.904414	0.998805
ENSOCUT00000033203	ENSOCUG00000008949	TXNRD3	thioredoxin reductase 3	ProteinCodingRNA	0	4.45875	5.02088	0	5.97126	4.48613	3.15988	3.4858	0.325921	0.704088	0.986021
ENSOCUT00000033202	ENSOCUG00000029392	---	---	ProteinCodingRNA	10.9894	10.8642	10.8184	11.0057	10.5231	10.5564	10.8907	10.6951	-0.195612	0.2837	0.979983
ENSOCUT00000013600	ENSOCUG00000013603	ALAS2	5-aminolevulinate synthase 2	ProteinCodingRNA	9.15176	9.80019	11.1298	8.76254	8.29341	7.29457	10.0272	8.11684	-1.9104	0.000166283	0.0293789
ENSOCUT00000021526	ENSOCUG00000002384	NPAS2	neuronal PAS domain protein 2	ProteinCodingRNA	9.2023	9.38299	9.85819	9.67228	10.3291	9.97338	9.48116	9.99158	0.510415	0.0409216	0.589344
ENSOCUT00000021525	ENSOCUG00000028104	---	---	OtherNonCodingRNA	0	0	2.45817	0	2.01302	2.02102	0.819391	1.34468	0.525291	0.841451	0.988995
ENSOCUT00000033206	ENSOCUG00000009212	CD1A	T-cell surface glycoprotein CD1a precursor	ProteinCodingRNA	4.16177	4.95351	5.71959	5.31318	3.18535	3.0245	4.94496	3.84101	-1.10395	0.285775	0.979983
ENSOCUT00000013571	ENSOCUG00000013557	WNK1	WNK lysine deficient protein kinase 1	ProteinCodingRNA	13.9158	14.0965	14.2997	13.9748	14.2004	14.2268	14.104	14.134	0.030037	0.865745	0.992575
ENSOCUT00000013573	ENSOCUG00000013575	OR8B8	olfactory receptor family 8 subfamily B member 8	ProteinCodingRNA	0	1.58449	2.72661	0	2.59943	0	1.43703	0.866475	-0.570558	0.807278	0.986021
ENSOCUT00000013572	ENSOCUG00000013563	EHBP1	EH domain binding protein 1	ProteinCodingRNA	11.8484	11.9787	12.1236	11.8124	11.9846	12.2604	11.9836	12.0191	0.0355329	0.783932	0.986021
ENSOCUT00000013575	ENSOCUG00000013577	FAM171A2	family with sequence similarity 171 member A2	ProteinCodingRNA	7.25023	6.81947	6.82502	7.07856	6.66102	6.99353	6.96491	6.91103	-0.0538727	0.797867	0.986021
ENSOCUT00000013574	ENSOCUG00000013576	---	---	OtherNonCodingRNA	6.43192	6.86966	7.15582	6.67761	7.39227	7.09384	6.81913	7.05458	0.235445	0.433466	0.986021
MSTRG.2894.1	---	---	---	Predicted_LncRNA	6.08214	6.74076	6.47015	6.57608	5.97126	6.11502	6.43102	6.22079	-0.210231	0.497729	0.986021
ENSOCUT00000023965	ENSOCUG00000024990	NCR3	natural cytotoxicity triggering receptor 3	ProteinCodingRNA	0	1.58449	3.6133	2.57749	0	0	1.73259	0.859163	-0.873432	0.547165	0.986021
ENSOCUT00000023964	ENSOCUG00000022932	---	---	OtherNonCodingRNA	1.42753	0	1.08665	0	1.0087	1.01405	0.83806	0.674248	-0.163811	0.819399	0.986021
ENSOCUT00000021549	ENSOCUG00000026989	---	---	ProteinCodingRNA	1.82162	0.999643	0	0.99552	1.0087	2.02102	0.940422	1.34175	0.401324	0.776633	0.986021
ENSOCUT00000023963	ENSOCUG00000011955	SIDT2	SID1 transmembrane family member 2	ProteinCodingRNA	12.4105	12.2769	11.8692	12.5468	11.1232	11.1449	12.1855	11.605	-0.580513	0.279813	0.979983
ENSOCUT00000023962	ENSOCUG00000024537	---	---	ProteinCodingRNA	7.96725	8.40443	7.32715	6.81128	2.33582	7.24694	7.89961	5.46468	-2.43493	0.0980873	0.793101
ENSOCUT00000023969	ENSOCUG00000001117	CDKL4	cyclin dependent kinase like 4	ProteinCodingRNA	2.78963	0	0	3.69216	3.92308	3.83334	0.929875	3.81619	2.88632	0.0299876	0.525762
ENSOCUT00000023968	ENSOCUG00000022935	RF00026	---	OtherNonCodingRNA	0	1.58449	1.08665	2.31475	1.0087	1.01405	0.890379	1.44583	0.555454	0.550253	0.986021
ENSOCUT00000032077	ENSOCUG00000023648	---	---	ProteinCodingRNA	2.38533	2.32136	0	1.57899	0	0	1.5689	0.526329	-1.04257	0.352907	0.986021
ENSOCUT00000027274	ENSOCUG00000024801	---	---	ProteinCodingRNA	2.13084	2.58437	0	0	2.33582	2.34434	1.57174	1.56005	-0.0116827	0.970836	0.999819
ENSOCUT00000027277	ENSOCUG00000015265	NEURL4	neuralized E3 ubiquitin protein ligase 4	ProteinCodingRNA	0	0	0	0.99552	0	0	0	0.33184	0.33184	0.80659	0.986021
ENSOCUT00000027271	ENSOCUG00000025082	RF00108	---	OtherNonCodingRNA	1.42753	0.999643	1.08665	0	1.0087	1.60366	1.17127	0.870787	-0.300487	0.840446	0.988781
ENSOCUT00000005289	ENSOCUG00000005292	TRIM2	tripartite motif containing 2	ProteinCodingRNA	11.1369	11.0084	11.1005	11.1414	11.1715	10.7961	11.082	11.0364	-0.0455993	0.787455	0.986021
ENSOCUT00000009804	ENSOCUG00000009802	IFT81	intraflagellar transport 81	ProteinCodingRNA	8.1414	8.12341	8.40148	8.01343	8.31649	8.51573	8.2221	8.28188	0.0597861	0.71765	0.986021
ENSOCUT00000027279	ENSOCUG00000008144	CHCHD6	coiled-coil-helix-coiled-coil-helix domain containing 6	ProteinCodingRNA	8.05237	7.76084	7.78963	8.03545	7.34815	7.43719	7.86761	7.60693	-0.260682	0.348732	0.986021
ENSOCUT00000010694	ENSOCUG00000010681	PAPLN	papilin, proteoglycan like sulfated glycoprotein	ProteinCodingRNA	9.84195	9.91517	9.68781	10.6439	9.00883	9.29236	9.81498	9.64835	-0.166621	0.965136	0.999819
MSTRG.16045.1	---	---	---	Predicted_LncRNA	6.67795	6.39161	6.48833	6.77247	7.81168	7.27571	6.5193	7.28662	0.76732	0.0106321	0.338074
MSTRG.18442.1	---	---	---	Predicted_LncRNA	6.64179	6.76748	7.2006	6.59103	7.00589	7.59006	6.86995	7.06233	0.192372	0.487293	0.986021
ENSOCUT00000001803	ENSOCUG00000001803	---	---	ProteinCodingRNA	7.49285	7.86965	8.03807	8.20538	8.13102	7.56697	7.80019	7.96779	0.167595	0.484376	0.986021
ENSOCUT00000033348	ENSOCUG00000014981	ABCB1	multidrug resistance protein 1	ProteinCodingRNA	0	6.94181	7.3472	9.06251	7.12574	10.7795	4.763	8.98924	4.22624	0.11095	0.810776
ENSOCUT00000006077	ENSOCUG00000006074	TLK2	tousled like kinase 2	ProteinCodingRNA	10.0643	10.0409	10.0447	10.166	10.1324	9.9631	10.05	10.0871	0.0371443	0.680379	0.986021
ENSOCUT00000033344	ENSOCUG00000029502	MICU2	mitochondrial calcium uptake 2	ProteinCodingRNA	9.69381	9.32796	9.13096	9.72575	9.38364	9.27347	9.38425	9.46095	0.0767046	0.741322	0.986021
ENSOCUT00000033345	ENSOCUG00000013405	NUDT3	nudix hydrolase 3	ProteinCodingRNA	0.883565	0.999643	1.08665	0.99552	1.0087	1.01405	0.989953	1.00609	0.0161357	0.981615	0.999819
ENSOCUT00000033340	ENSOCUG00000003680	GSTA4	glutathione S-transferase alpha 4	ProteinCodingRNA	4.46749	2.99938	4.91738	2.99215	4.10379	4.27443	4.12808	3.79012	-0.337957	0.509339	0.986021
ENSOCUT00000033341	ENSOCUG00000029421	SNX6	sorting nexin 6	ProteinCodingRNA	10.0039	10.06	10.0509	9.7724	9.95543	10.0378	10.0382	9.92186	-0.116371	0.301413	0.983233
ENSOCUT00000033342	ENSOCUG00000009440	LRP3	LDL receptor related protein 3	ProteinCodingRNA	8.62783	8.10258	8.53423	7.98541	7.65388	7.29457	8.42155	7.64462	-0.776925	0.00249443	0.158051
ENSOCUT00000033343	ENSOCUG00000013146	PKD2L1	polycystin 2 like 1, transient receptor potential cation channel	ProteinCodingRNA	4.97349	4.80667	4.48235	4.7987	4.66051	5.38484	4.75417	4.94802	0.193846	0.591276	0.986021
MSTRG.15766.1	---	---	---	Predicted_LncRNA	10.039	9.57104	9.56047	9.74926	10.059	9.79114	9.72352	9.86646	0.142944	0.487978	0.986021
ENSOCUT00000000566	ENSOCUG00000000566	XPR1	xenotropic and polytropic retrovirus receptor 1	ProteinCodingRNA	9.61672	9.67877	9.52789	9.55519	9.68088	9.51375	9.60779	9.58327	-0.0245225	0.812292	0.986021
ENSOCUT00000004190	ENSOCUG00000004185	FNDC3B	fibronectin type III domain containing 3B	ProteinCodingRNA	11.6484	11.8689	11.9937	11.5471	12.0638	12.3177	11.837	11.9762	0.139188	0.454087	0.986021
ENSOCUT00000003365	ENSOCUG00000003362	LVRN	laeverin	ProteinCodingRNA	11.5437	11.8986	11.9554	11.4047	11.8869	12.1662	11.7992	11.8193	0.0200289	0.853335	0.990727
ENSOCUT00000003367	ENSOCUG00000003365	INPP4A	inositol polyphosphate-4-phosphatase type I A	ProteinCodingRNA	10.8551	10.8812	11.212	11.0169	11.2096	10.8329	10.9827	11.0198	0.0370427	0.823183	0.986021
ENSOCUT00000007247	ENSOCUG00000007243	ZRANB3	zinc finger RANBP2-type containing 3	ProteinCodingRNA	7.47926	7.13884	6.89481	7.36612	6.71761	6.65704	7.17097	6.91359	-0.257378	0.417004	0.986021
ENSOCUT00000003369	ENSOCUG00000003369	APOOL	apolipoprotein O like	ProteinCodingRNA	8.40861	8.38299	8.19568	8.72914	8.53299	8.56316	8.3291	8.60843	0.279335	0.0427849	0.605337
ENSOCUT00000003368	ENSOCUG00000003370	MSRA	methionine sulfoxide reductase A	ProteinCodingRNA	8.38328	8.03271	8.17339	8.28107	7.26515	8.18774	8.19646	7.91132	-0.285141	0.455628	0.986021
MSTRG.14128.1	---	---	---	Predicted_LncRNA	9.18983	9.15916	9.31276	9.1229	9.2747	9.74903	9.22058	9.38221	0.161625	0.350043	0.986021
ENSOCUT00000012978	ENSOCUG00000012959	ADAMTS20	ADAM metallopeptidase with thrombospondin type 1 motif 20	ProteinCodingRNA	8.41933	7.81307	6.79614	7.94526	6.55631	6.40267	7.67618	6.96808	-0.708101	0.220878	0.949977
ENSOCUT00000015301	ENSOCUG00000015307	SLC35F1	solute carrier family 35 member F1	ProteinCodingRNA	4.67259	5.32123	5.37354	4.07902	4.33841	4.19635	5.12245	4.20459	-0.917864	0.0175093	0.423179
ENSOCUT00000001800	ENSOCUG00000001799	EPB41L2	erythrocyte membrane protein band 4.1 like 2	ProteinCodingRNA	11.5768	12.0365	12.1413	11.3579	11.4525	11.9014	11.9182	11.5706	-0.347598	0.114302	0.820412
MSTRG.6546.1	---	---	---	Predicted_LncRNA	9.83263	10.3895	9.80843	9.83496	9.86594	9.84492	10.0102	9.84861	-0.161567	0.328402	0.986021
ENSOCUT00000007242	ENSOCUG00000007242	ABCB10	ATP binding cassette subfamily B member 10	ProteinCodingRNA	9.40109	9.40656	9.61317	9.45252	9.64849	9.45628	9.47361	9.5191	0.0454922	0.710129	0.986021
ENSOCUT00000002102	ENSOCUG00000002104	ASB17	ankyrin repeat and SOCS box containing 17	ProteinCodingRNA	0	1.99947	0	0	0	0	0.666488	0	-0.666488	0.543154	0.986021
ENSOCUT00000000549	ENSOCUG00000000548	CCNDBP1	cyclin D1 binding protein 1	ProteinCodingRNA	9.41365	9.28006	9.34802	9.45864	9.53892	9.36999	9.34725	9.45585	0.108606	0.297533	0.983233
ENSOCUT00000025061	ENSOCUG00000027673	NAT6	N-acetyltransferase 6	ProteinCodingRNA	7.35818	7.42556	7.55114	7.171	7.23639	7.83519	7.44496	7.41419	-0.0307637	0.999807	0.999863
ENSOCUT00000012958	ENSOCUG00000012955	SEMA4D	semaphorin 4D	ProteinCodingRNA	11.125	10.8018	10.6601	11.2695	10.3016	10.122	10.8623	10.5644	-0.297944	0.499164	0.986021
MSTRG.2381.1	---	---	---	Predicted_LncRNA	7.89739	7.86348	8.04423	7.82396	8.26046	7.69316	7.93503	7.92586	-0.0091739	0.959769	0.999819
ENSOCUT00000033551	ENSOCUG00000016823	COBL	cordon-bleu WH2 repeat protein	ProteinCodingRNA	8.18394	8.90016	9.46275	8.72237	10.7495	10.1675	8.84895	9.87978	1.03084	0.0222666	0.458866
ENSOCUT00000025065	ENSOCUG00000015229	ATAD5	ATPase family, AAA domain containing 5	ProteinCodingRNA	9.90052	9.5992	9.57754	9.76582	9.70906	9.73874	9.69242	9.73787	0.0454523	0.780452	0.986021
ENSOCUT00000007260	ENSOCUG00000007260	---	---	ProteinCodingRNA	7.51967	7.14904	7.47116	7.41734	7.96564	7.86073	7.37996	7.7479	0.367946	0.0981612	0.793101
ENSOCUT00000000541	ENSOCUG00000000540	KCNIP1	potassium voltage-gated channel interacting protein 1	ProteinCodingRNA	3.36376	4.24725	4.62058	5.63506	3.60086	0	4.0772	3.07864	-0.998555	0.851299	0.990131
ENSOCUT00000012956	ENSOCUG00000012958	---	---	OtherNonCodingRNA	13.7326	13.6031	13.6202	13.6004	13.9723	13.9881	13.652	13.8536	0.201597	0.152316	0.884032
ENSOCUT00000007263	ENSOCUG00000007261	MCUR1	mitochondrial calcium uniporter regulator 1	ProteinCodingRNA	8.47178	8.48713	8.32265	8.25784	7.48485	7.89821	8.42718	7.8803	-0.546885	0.0264729	0.499159
ENSOCUT00000007265	ENSOCUG00000007265	TREM2	triggering receptor expressed on myeloid cells 2	ProteinCodingRNA	3.77336	5.20876	6.55881	4.74625	6.94794	7.61278	5.18031	6.43565	1.25535	0.13339	0.861429
ENSOCUT00000029952	ENSOCUG00000008247	TPD52	tumor protein D52	ProteinCodingRNA	11.0349	11.0546	10.9909	11.0224	10.7038	11.0723	11.0268	10.9329	-0.0939191	0.512047	0.986021
MSTRG.14163.1	---	---	---	Predicted_LncRNA	8.05237	8.11823	8.22307	8.16098	9.49305	8.96454	8.13122	8.87286	0.741636	0.0123893	0.35878
ENSOCUT00000026270	ENSOCUG00000025929	---	---	ProteinCodingRNA	2.95595	3.99933	3.6133	2.79967	3.33754	2.6083	3.52286	2.91517	-0.60769	0.293935	0.980264
ENSOCUT00000008716	ENSOCUG00000008721	HLA-DPB1	major histocompatibility complex, class II, DP beta 1	ProteinCodingRNA	5.31711	7.15916	7.27576	6.87375	5.14613	5.61235	6.58401	5.87741	-0.706604	0.248499	0.96761
ENSOCUT00000029956	ENSOCUG00000023426	---	---	ProteinCodingRNA	2.78963	2.58437	0	1.99327	3.01518	0	1.79133	1.66949	-0.121845	0.936478	0.999819
ENSOCUT00000008710	ENSOCUG00000008711	SAMD7	sterile alpha motif domain containing 7	ProteinCodingRNA	1.42753	1.99947	2.72661	0	0	0	2.0512	0	-2.0512	0.0291941	0.525628
ENSOCUT00000029955	ENSOCUG00000027711	---	---	OtherNonCodingRNA	7.2819	6.47503	5.92033	6.824	6.03944	6.65704	6.55909	6.50683	-0.0522609	0.764035	0.986021
ENSOCUT00000029958	ENSOCUG00000007463	CCDC149	coiled-coil domain containing 149	ProteinCodingRNA	6.99706	7.614	8.03189	7.23901	7.33011	7.05012	7.54765	7.20641	-0.341236	0.198503	0.932991
ENSOCUT00000011317	ENSOCUG00000011309	PLXDC1	plexin domain containing 1	ProteinCodingRNA	9.141	9.50708	8.98181	9.65282	8.13102	7.67168	9.20997	8.48517	-0.724795	0.32941	0.986021
ENSOCUT00000011316	ENSOCUG00000011311	KLKB1	kallikrein B1	ProteinCodingRNA	2.78963	2.58437	3.14838	0	3.71645	3.34712	2.84079	2.35452	-0.486268	0.870107	0.992967
ENSOCUT00000011315	ENSOCUG00000011318	KLF5	Krueppel-like factor 5	ProteinCodingRNA	10.857	12.0056	12.5325	11.7679	12.5652	11.3431	11.7984	11.8921	0.0936788	0.945903	0.999819
ENSOCUT00000010910	ENSOCUG00000010895	SVIL	supervillin	ProteinCodingRNA	11.9023	12.2266	12.6084	11.8016	12.7346	12.9226	12.2458	12.4863	0.240488	0.371518	0.986021
ENSOCUT00000020728	ENSOCUG00000020728	RF00001	---	OtherNonCodingRNA	0.883565	0.999643	1.08665	1.99327	1.59655	1.01405	0.989953	1.53462	0.54467	0.4709	0.986021
MSTRG.12856.1	---	---	---	Predicted_LncRNA	6.78131	6.24722	6.39509	6.824	6.37468	6.55122	6.47454	6.5833	0.108762	0.708834	0.986021
ENSOCUT00000011031	ENSOCUG00000011023	NRAP	nebulin related anchoring protein	ProteinCodingRNA	3.85986	4.9062	1.69938	2.57749	0	0	3.48848	0.859163	-2.62931	0.0397074	0.586607
ENSOCUT00000015477	ENSOCUG00000015475	USP43	ubiquitin specific peptidase 43	ProteinCodingRNA	6.93864	7.26608	7.025	7.75262	7.26515	7.08304	7.07657	7.36694	0.290366	0.217522	0.94854
ENSOCUT00000020721	ENSOCUG00000020721	RF00420	---	OtherNonCodingRNA	4.16177	4.16925	2.45817	4.69181	3.4752	4.27443	3.5964	4.14715	0.55075	0.497116	0.986021
ENSOCUT00000020727	ENSOCUG00000020727	RF00001	---	OtherNonCodingRNA	0.883565	0	1.08665	0	1.0087	1.01405	0.656738	0.674248	0.0175102	0.983064	0.999819
ENSOCUT00000011039	ENSOCUG00000011007	LRP2	LDL receptor related protein 2	ProteinCodingRNA	5.15551	5.42557	5.06997	4.74625	8.903	7.96449	5.21702	7.20458	1.98756	0.000571662	0.0628382
ENSOCUT00000023381	ENSOCUG00000022534	RF00004	---	OtherNonCodingRNA	4.46749	3.58431	3.74004	4.3134	5.87502	5.75536	3.93061	5.3146	1.38398	0.00884977	0.314394
ENSOCUT00000023380	ENSOCUG00000025694	RALYL	RALY RNA binding protein like	ProteinCodingRNA	1.82162	1.58449	2.72661	0	0	2.6083	2.04424	0.869434	-1.17481	0.560219	0.986021
ENSOCUT00000023383	ENSOCUG00000021126	---	Metallothionein-2A	ProteinCodingRNA	10.0448	8.20874	6.524	8.36174	8.33921	8.37661	8.25919	8.35919	0.0999972	0.430374	0.986021
ENSOCUT00000023385	ENSOCUG00000008785	IGF2R	insulin like growth factor 2 receptor	ProteinCodingRNA	11.9728	11.7182	11.919	12.0061	12.2124	12.0223	11.87	12.0803	0.210238	0.0784054	0.739764
ENSOCUT00000000568	ENSOCUG00000000565	---	---	ProteinCodingRNA	10.2145	10.2766	10.8592	10.4484	10.7756	10.4563	10.4501	10.5601	0.11002	0.685774	0.986021
ENSOCUT00000023387	ENSOCUG00000009681	---	---	ProteinCodingRNA	3.94146	4.85729	3.6133	1.57899	2.82223	3.34712	4.13735	2.58278	-1.55457	0.0289392	0.525018
ENSOCUT00000001148	ENSOCUG00000001145	GRIP2	glutamate receptor interacting protein 2	ProteinCodingRNA	4.35286	0	3.85655	0	0	0	2.73647	0	-2.73647	0.00998473	0.329905
ENSOCUT00000004467	ENSOCUG00000004468	PUS3	pseudouridylate synthase 3	ProteinCodingRNA	8.19646	8.40443	8.54295	8.39619	8.7384	8.81253	8.38128	8.64904	0.267764	0.133923	0.863133
ENSOCUT00000004465	ENSOCUG00000004467	KCNC2	potassium voltage-gated channel subfamily C member 2	ProteinCodingRNA	0	0	0	0	0	2.34434	0	0.781447	0.781447	0.46385	0.986021
ENSOCUT00000004464	ENSOCUG00000004463	MTREX	Mtr4 exosome RNA helicase	ProteinCodingRNA	11.5619	11.4567	11.4537	11.5316	11.5594	11.5188	11.4908	11.5366	0.0458453	0.531632	0.986021
ENSOCUT00000001143	ENSOCUG00000001144	SLC6A6	solute carrier family 6 member 6	ProteinCodingRNA	11.4993	11.6989	11.4891	11.5599	11.6625	10.9535	11.5624	11.392	-0.170431	0.499755	0.986021
ENSOCUT00000001634	ENSOCUG00000001633	HPS1	HPS1, biogenesis of lysosomal organelles complex 3 subunit 1	ProteinCodingRNA	10.1332	10.0049	10.1626	10.1009	9.73671	9.90291	10.1002	9.9135	-0.186746	0.178681	0.914954
ENSOCUT00000001140	ENSOCUG00000001143	---	---	ProteinCodingRNA	6.97785	6.67172	7.2006	6.71903	7.91208	7.7693	6.95005	7.46681	0.516751	0.104883	0.803746
ENSOCUT00000008773	ENSOCUG00000008776	RGS22	regulator of G protein signaling 22	ProteinCodingRNA	0.883565	4.16925	0	2.57749	0	0	1.68427	0.859163	-0.82511	0.442846	0.986021
ENSOCUT00000008772	ENSOCUG00000008774	PTEN	phosphatase and tensin homolog	ProteinCodingRNA	11.822	11.829	11.939	11.8622	11.9853	11.8883	11.8634	11.9119	0.048551	0.549204	0.986021
ENSOCUT00000011333	ENSOCUG00000011332	PACSIN1	protein kinase C and casein kinase substrate in neurons 1	ProteinCodingRNA	5.82694	5.12859	5.83769	4.84932	3.71645	5.07152	5.59774	4.54576	-1.05198	0.0353265	0.561616
ENSOCUT00000022384	ENSOCUG00000028075	---	---	OtherNonCodingRNA	4.22832	1.99947	3.6133	4.45087	3.18535	3.34712	3.28036	3.66111	0.380751	0.760937	0.986021
ENSOCUT00000032343	ENSOCUG00000028348	RF00598	small nucleolar RNA, H/ACA box 50B	OtherNonCodingRNA	2.6016	2.58437	2.1281	1.99327	2.82223	3.0245	2.43802	2.61333	0.175314	0.753363	0.986021
ENSOCUT00000032342	ENSOCUG00000028347	RF00003	---	OtherNonCodingRNA	0.883565	1.99947	2.1281	1.57899	3.18535	0	1.67038	1.58811	-0.0822644	0.733519	0.986021
ENSOCUT00000010321	ENSOCUG00000010322	RBM15B	RNA binding motif protein 15B	ProteinCodingRNA	9.7892	9.67348	9.54753	9.92767	9.59663	9.60157	9.67007	9.70863	0.0385573	0.77138	0.986021
ENSOCUT00000032347	ENSOCUG00000028352	RF00001	---	OtherNonCodingRNA	0	0	1.08665	0	0	1.01405	0.362216	0.338016	-0.0242	0.992719	0.999819
ENSOCUT00000032346	ENSOCUG00000028351	---	---	OtherNonCodingRNA	15.9233	15.6161	15.9178	15.627	16.3708	16.8836	15.8191	16.2938	0.474736	0.0961206	0.786655
ENSOCUT00000019203	ENSOCUG00000019203	---	---	OtherNonCodingRNA	0	0	1.08665	0	0	0	0.362216	0	-0.362216	0.820752	0.986021
ENSOCUT00000032348	ENSOCUG00000028353	RF00026	---	OtherNonCodingRNA	1.42753	1.58449	1.69938	0.99552	2.01302	2.6083	1.57046	1.87228	0.301818	0.589985	0.986021
ENSOCUT00000001043	ENSOCUG00000001045	PARS2	prolyl-tRNA synthetase 2, mitochondrial	ProteinCodingRNA	7.64676	6.84478	7.16714	7.43402	7.60971	7.72827	7.21956	7.59067	0.371102	0.204569	0.938709
MSTRG.9509.2	---	---	---	Predicted_LncRNA	5.51668	5.80665	5.59095	5.1612	4.97098	6.0048	5.6381	5.37899	-0.259102	0.617458	0.986021
ENSOCUT00000025824	ENSOCUG00000003978	SPECC1	sperm antigen with calponin homology and coiled-coil domains 1	ProteinCodingRNA	11.4691	11.2731	10.3457	11.7023	9.71949	9.75244	11.0293	10.3914	-0.637877	0.588778	0.986021
ENSOCUT00000011789	ENSOCUG00000011792	---	---	ProteinCodingRNA	12.4064	12.6564	12.7148	12.506	13.0619	12.8803	12.5925	12.8161	0.223535	0.200432	0.936313
ENSOCUT00000026607	ENSOCUG00000001145	GRIP2	glutamate receptor interacting protein 2	ProteinCodingRNA	2.78963	2.32136	2.95286	3.45128	5.18679	3.48487	2.68795	4.04098	1.35303	0.0268173	0.502981
ENSOCUT00000008775	ENSOCUG00000008757	MYOF	myoferlin	ProteinCodingRNA	11.8116	12.1195	12.3557	11.6555	12.0921	12.5253	12.0956	12.091	-0.00462203	0.932574	0.999819
ENSOCUT00000004035	ENSOCUG00000004031	NUB1	negative regulator of ubiquitin like proteins 1	ProteinCodingRNA	10.3579	10.9586	10.9423	10.8805	10.7571	10.6682	10.7529	10.7686	0.0156985	0.972022	0.999819
ENSOCUT00000011780	ENSOCUG00000011775	RIMS2	regulating synaptic membrane exocytosis 2	ProteinCodingRNA	1.82162	3.45878	2.1281	2.31475	2.59943	4.41896	2.4695	3.11105	0.641546	0.373129	0.986021
ENSOCUT00000011781	ENSOCUG00000011785	KLHL38	kelch like family member 38	ProteinCodingRNA	5.8053	6.2847	6.67443	6.1409	6.6896	7.20768	6.25481	6.67939	0.42458	0.243942	0.964163
ENSOCUT00000011782	ENSOCUG00000011784	CREB3L4	cAMP responsive element binding protein 3 like 4	ProteinCodingRNA	4.16177	3.45878	3.47433	3.69216	4.10379	4.34851	3.6983	4.04815	0.349854	0.513543	0.986021
ENSOCUT00000026608	ENSOCUG00000023491	---	---	ProteinCodingRNA	9.34221	9.50906	8.88911	9.7724	8.03408	8.62035	9.24679	8.80894	-0.437852	0.527544	0.986021
ENSOCUT00000011785	ENSOCUG00000011788	JTB	jumping translocation breakpoint	ProteinCodingRNA	9.90179	10.0881	10.1583	9.91733	10.1671	10.3521	10.0494	10.1455	0.0961064	0.508394	0.986021
ENSOCUT00000011786	ENSOCUG00000011786	ECM1	extracellular matrix protein 1	ProteinCodingRNA	11.2653	12.2678	12.5983	11.3871	12.8837	13.3201	12.0438	12.5303	0.486496	0.235183	0.956857
ENSOCUT00000011787	ENSOCUG00000011780	CYFIP2	cytoplasmic FMR1 interacting protein 2	ProteinCodingRNA	10.5103	10.5189	9.66202	10.8443	8.44355	8.40292	10.2304	9.23027	-1.00013	0.497265	0.986021
ENSOCUT00000033832	ENSOCUG00000029272	---	---	ProteinCodingRNA	0	0	1.69938	0	1.0087	1.01405	0.566458	0.674248	0.10779	0.971435	0.999819
ENSOCUT00000033833	ENSOCUG00000009700	SATB2	SATB homeobox 2	ProteinCodingRNA	8.63398	8.28469	8.39668	8.54947	8.85651	8.42448	8.43845	8.61015	0.171704	0.34848	0.986021
ENSOCUT00000033830	ENSOCUG00000003599	PTPN6	protein tyrosine phosphatase, non-receptor type 6	ProteinCodingRNA	8.82617	8.31217	8.92291	7.83656	8.93914	7.99364	8.68708	8.25645	-0.430639	0.289097	0.979983
ENSOCUT00000033836	ENSOCUG00000009107	NT5C2	5-nucleotidase, cytosolic II	ProteinCodingRNA	9.20023	9.77243	9.48555	9.4173	10.454	10.1865	9.48607	10.0193	0.533229	0.0509959	0.642819
ENSOCUT00000033835	ENSOCUG00000029614	PPM1D	protein phosphatase, Mg2+/Mn2+ dependent 1D	ProteinCodingRNA	10.3174	10.338	10.0339	10.434	10.3004	10.2947	10.2298	10.343	0.113244	0.394445	0.986021
ENSOCUT00000023033	ENSOCUG00000017155	WDFY3	WD repeat and FYVE domain containing 3	ProteinCodingRNA	13.775	14.074	14.1512	13.9132	13.981	14.0192	14.0001	13.9711	-0.0289415	0.788045	0.986021
ENSOCUT00000028925	ENSOCUG00000021439	---	---	ProteinCodingRNA	11.1547	11.291	11.3905	11.2566	11.7622	11.432	11.2787	11.4836	0.204874	0.189836	0.923132
ENSOCUT00000033838	ENSOCUG00000000346	HERPUD2	HERPUD family member 2	ProteinCodingRNA	6.29891	7.02166	7.04968	6.33099	6.18702	6.0048	6.79008	6.17427	-0.615811	0.0310824	0.534913
ENSOCUT00000033839	ENSOCUG00000029375	---	---	ProteinCodingRNA	4.16177	3.90623	4.48235	3.79902	4.18631	4.41896	4.18345	4.13476	-0.0486847	0.924537	0.999819
MSTRG.8851.1	---	---	---	Predicted_LncRNA	4.35286	4.45875	4.91738	4.23943	2.82223	3.61062	4.57633	3.55742	-1.0189	0.0755008	0.736455
ENSOCUT00000023036	ENSOCUG00000000864	CADM1	cell adhesion molecule 1	ProteinCodingRNA	10.8959	10.7953	11.0417	10.7797	11.059	10.9609	10.911	10.9332	0.0222122	0.850973	0.990131
ENSOCUT00000006279	ENSOCUG00000006280	CDSN	corneodesmosin	ProteinCodingRNA	14.1076	14.0852	13.7394	14.4049	13.9226	13.9568	13.9774	14.0948	0.117389	0.528218	0.986021
ENSOCUT00000009994	ENSOCUG00000009995	LACTB	lactamase beta	ProteinCodingRNA	8.56163	9.2962	9.60279	8.90393	8.75877	9.13382	9.15354	8.93217	-0.221365	0.338573	0.986021
ENSOCUT00000009996	ENSOCUG00000009996	---	---	ProteinCodingRNA	6.47367	6.67172	6.65847	6.09968	7.05063	6.99353	6.60129	6.71461	0.113326	0.589018	0.986021
ENSOCUT00000009997	ENSOCUG00000009998	SGMS2	sphingomyelin synthase 2	ProteinCodingRNA	10.2155	10.1013	10.237	10.045	10.9723	10.4996	10.1846	10.5056	0.321018	0.129054	0.852495
ENSOCUT00000009992	ENSOCUG00000009990	ITGA3	integrin subunit alpha 3	ProteinCodingRNA	11.1255	11.2841	11.9611	11.0632	11.8109	11.4766	11.4569	11.4502	-0.0066889	0.939032	0.999819
ENSOCUT00000002257	ENSOCUG00000002259	MPZL1	myelin protein zero like 1	ProteinCodingRNA	10.6609	10.7798	10.8013	10.6993	10.9076	11.1423	10.7473	10.9164	0.169053	0.217701	0.94854
ENSOCUT00000009442	ENSOCUG00000009442	LATS2	large tumor suppressor kinase 2	ProteinCodingRNA	10.7214	10.765	10.8372	10.9372	10.7921	10.8797	10.7745	10.8697	0.0951604	0.259925	0.970468
MSTRG.1480.1	---	---	---	Predicted_LncRNA	3.58305	4.9062	5.83769	4.23943	3.71645	4.02623	4.77565	3.99404	-0.78161	0.108727	0.807721
ENSOCUT00000009440	ENSOCUG00000009427	LAMA2	laminin subunit alpha 2	ProteinCodingRNA	13.602	13.3994	13.1041	13.5802	14.5801	14.4069	13.3685	14.1891	0.820578	0.00293068	0.168828
ENSOCUT00000009441	ENSOCUG00000009443	SLC7A10	solute carrier family 7 member 10	ProteinCodingRNA	6.10002	6.93003	7.26526	5.12057	3.82346	4.34851	6.7651	4.43084	-2.33426	1.37932e-06	0.000470639
ENSOCUT00000017369	ENSOCUG00000017367	KLHDC1	kelch domain containing 1	ProteinCodingRNA	7.82398	7.79371	7.88873	7.90395	8.26995	8.04466	7.83547	8.07285	0.237382	0.129196	0.852578
ENSOCUT00000007846	ENSOCUG00000007847	GLYCTK	glycerate kinase	ProteinCodingRNA	8.04777	8.0161	8.09847	7.57604	8.19719	8.7144	8.05411	8.16254	0.108428	0.550451	0.986021
ENSOCUT00000007840	ENSOCUG00000007839	IL6ST	interleukin 6 signal transducer	ProteinCodingRNA	11.9725	12.4894	12.9328	11.8408	12.6789	12.9054	12.4649	12.4751	0.0101512	0.940777	0.999819
ENSOCUT00000032122	ENSOCUG00000028172	---	---	OtherNonCodingRNA	0	0	0	0	4.66051	1.01405	0	1.89152	1.89152	0.0407914	0.589344
ENSOCUT00000007842	ENSOCUG00000007842	KYAT3	kynurenine aminotransferase 3	ProteinCodingRNA	9.7823	9.57483	9.46734	9.81281	9.29808	9.67898	9.60816	9.59662	-0.0115311	0.990201	0.999819
ENSOCUT00000007843	ENSOCUG00000007841	DARS2	aspartyl-tRNA synthetase 2, mitochondrial	ProteinCodingRNA	9.59954	9.6341	9.50353	9.70356	9.9946	10.0981	9.57906	9.93207	0.353018	0.0109983	0.343562
ENSOCUT00000007849	ENSOCUG00000007852	---	---	OtherNonCodingRNA	7.70634	8.05999	8.11026	7.71217	8.56804	8.72486	7.95886	8.33502	0.376163	0.157364	0.891194
ENSOCUT00000003446	ENSOCUG00000003444	HECTD3	HECT domain E3 ubiquitin protein ligase 3	ProteinCodingRNA	10.562	10.3895	10.409	10.5224	10.5719	10.5816	10.4535	10.5586	0.105138	0.25665	0.969868
ENSOCUT00000032128	ENSOCUG00000025559	---	---	ProteinCodingRNA	8.78532	8.82584	8.84396	8.63129	9.14143	9.21031	8.81837	8.99434	0.175975	0.297803	0.983233
MSTRG.6848.1	---	---	---	Predicted_LncRNA	5.61944	5.16923	5.41213	5.1612	4.71712	5.15645	5.40027	5.01159	-0.388676	0.234551	0.956247
ENSOCUT00000005739	ENSOCUG00000005734	UTP4	UTP4, small subunit processome component	ProteinCodingRNA	10.6654	10.5842	10.539	10.6528	10.6639	10.57	10.5962	10.6289	0.0326896	0.701404	0.986021
ENSOCUT00000025067	ENSOCUG00000021502	LZTS2	leucine zipper tumor suppressor 2	ProteinCodingRNA	2.6016	1.99947	1.08665	7.89795	1.0087	1.01405	1.8959	3.3069	1.411	0.00503944	0.231915
ENSOCUT00000005735	ENSOCUG00000005740	---	---	ProteinCodingRNA	10.874	10.5758	10.7142	10.6158	10.5072	10.3644	10.7213	10.4958	-0.225516	0.0793127	0.742011
ENSOCUT00000005736	ENSOCUG00000005736	FAM184A	family with sequence similarity 184 member A	ProteinCodingRNA	7.29748	7.71354	8.02568	4.45087	7.02843	6.0048	7.6789	5.82803	-1.85087	0.00894054	0.314746
ENSOCUT00000005737	ENSOCUG00000005717	GCN1	GCN1, eIF2 alpha kinase activator homolog	ProteinCodingRNA	13.4084	13.1983	13.0374	13.4471	12.9943	13.0682	13.2147	13.1699	-0.044839	0.828771	0.98615
MSTRG.16148.1	---	---	---	Predicted_LncRNA	9.6805	9.52481	9.29739	9.84435	8.40961	8.55145	9.5009	8.93513	-0.565766	0.28535	0.979983
ENSOCUT00000030871	ENSOCUG00000023247	JPH4	junctophilin 4	ProteinCodingRNA	5.01178	4.16925	4.24647	3.79902	3.18535	2.34434	4.47583	3.10957	-1.36626	0.0234108	0.472585
ENSOCUT00000005733	ENSOCUG00000005742	KCTD14	potassium channel tetramerization domain containing 14	ProteinCodingRNA	6.51424	5.39162	6.27461	5.27666	6.01707	6.07194	6.06016	5.78856	-0.2716	0.45932	0.986021
ENSOCUT00000025823	ENSOCUG00000001786	FAM98B	family with sequence similarity 98 member B	ProteinCodingRNA	0	0	0	0	8.54477	9.1312	0	5.89199	5.89199	0.00594654	0.256714
ENSOCUT00000017874	ENSOCUG00000017867	FRAS1	Fraser extracellular matrix complex subunit 1	ProteinCodingRNA	11.0722	10.9858	11.5087	10.7935	11.0556	11.219	11.1889	11.0227	-0.166202	0.373152	0.986021
ENSOCUT00000011879	ENSOCUG00000011880	---	---	ProteinCodingRNA	11.5243	11.3369	11.2918	11.4015	10.9752	11.2337	11.3843	11.2035	-0.180884	0.244981	0.96427
ENSOCUT00000031690	ENSOCUG00000025805	SPATA9	spermatogenesis associated 9	ProteinCodingRNA	7.29748	7.9418	8.06859	7.80485	7.5871	7.28517	7.76929	7.55904	-0.210252	0.409385	0.986021
ENSOCUT00000031693	ENSOCUG00000000540	KCNIP1	potassium voltage-gated channel interacting protein 1	ProteinCodingRNA	4.97349	5.20876	2.95286	5.54581	0	0	4.37837	1.8486	-2.52977	0.702681	0.986021
ENSOCUT00000000708	ENSOCUG00000000708	CDS2	CDP-diacylglycerol synthase 2	ProteinCodingRNA	9.80018	9.67877	9.9046	9.65815	10.0901	10.0052	9.79452	9.91783	0.123313	0.399808	0.986021
ENSOCUT00000031696	ENSOCUG00000027923	RF00066	---	OtherNonCodingRNA	2.13084	2.32136	2.95286	2.79967	2.33582	2.34434	2.46835	2.49327	0.024924	0.98171	0.999819
ENSOCUT00000031697	ENSOCUG00000024190	---	---	ProteinCodingRNA	0.883565	1.58449	2.72661	2.57749	0	0	1.73156	0.859163	-0.872393	0.68947	0.986021
ENSOCUT00000009664	ENSOCUG00000009662	BCO2	beta-carotene oxygenase 2	ProteinCodingRNA	8.51906	8.88193	8.69543	7.53023	7.79205	8.22262	8.69881	7.8483	-0.850507	0.000325507	0.0462038
ENSOCUT00000018003	ENSOCUG00000023431	RF00001	---	OtherNonCodingRNA	0	0.999643	1.08665	0.99552	0	1.01405	0.695431	0.669856	-0.0255744	0.989045	0.999819
ENSOCUT00000009190	ENSOCUG00000009195	CLEC4E	C-type lectin domain family 4 member E	ProteinCodingRNA	5.71536	5.58426	6.2321	4.84932	4.92366	4.41896	5.84391	4.73064	-1.11327	0.00145697	0.116648
ENSOCUT00000009191	ENSOCUG00000009191	SLC25A32	solute carrier family 25 member 32	ProteinCodingRNA	7.89739	7.64315	7.95557	7.74596	7.55641	7.97622	7.83204	7.75953	-0.0725102	0.720261	0.986021
ENSOCUT00000009192	ENSOCUG00000009183	ANKRD44	ankyrin repeat domain 44	ProteinCodingRNA	9.74443	9.97227	9.7475	10.227	10.0145	9.4996	9.8214	9.91372	0.0923196	0.576185	0.986021
ENSOCUT00000009193	ENSOCUG00000009190	---	---	ProteinCodingRNA	11.7591	11.6521	11.7458	11.5013	12.0338	12.377	11.719	11.9707	0.251694	0.198151	0.932325
ENSOCUT00000010787	ENSOCUG00000010791	SRP9	signal recognition particle 9	ProteinCodingRNA	8.26542	8.09732	7.84003	8.35738	8.03408	8.10468	8.06759	8.16538	0.0977845	0.624356	0.986021
ENSOCUT00000010786	ENSOCUG00000010789	TMEM168	transmembrane protein 168	ProteinCodingRNA	9.2208	9.65392	9.59861	9.0838	9.14401	9.52378	9.49111	9.25053	-0.240581	0.221595	0.949977
ENSOCUT00000021899	ENSOCUG00000021576	RF00066	---	OtherNonCodingRNA	1.82162	1.58449	2.1281	1.57899	2.59943	2.6083	1.84474	2.26224	0.417502	0.525698	0.986021
ENSOCUT00000010784	ENSOCUG00000010785	---	---	ProteinCodingRNA	6.32954	7.01052	6.18831	6.18097	6.54071	6.75562	6.50946	6.49244	-0.01702	0.8904	0.995863
ENSOCUT00000010783	ENSOCUG00000010783	STARD8	StAR related lipid transfer domain containing 8	ProteinCodingRNA	9.49023	9.30078	9.01353	9.28106	8.80194	9.31332	9.26818	9.1321	-0.136077	0.529104	0.986021
MSTRG.19305.1	---	---	---	Predicted_LncRNA	0	6.95349	5.25117	7.11003	2.82223	0	4.06822	3.31075	-0.757465	0.955933	0.999819
ENSOCUT00000025820	ENSOCUG00000015169	ATP6V0A1	ATPase H+ transporting V0 subunit a1	ProteinCodingRNA	8.87372	8.85416	8.78269	9.48089	9.43727	8.99369	8.83686	9.30395	0.467094	0.00494965	0.228785
ENSOCUT00000017879	ENSOCUG00000017878	ANXA3	annexin A3	ProteinCodingRNA	9.94819	9.70665	9.57329	9.79355	9.24131	9.36554	9.74271	9.4668	-0.275907	0.183907	0.916492
ENSOCUT00000021892	ENSOCUG00000027420	---	---	OtherNonCodingRNA	10.3117	9.99647	10.2072	10.0983	10.0425	10.3633	10.1718	10.168	-0.00374797	0.983379	0.999819
ENSOCUT00000021890	ENSOCUG00000007043	TAOK3	TAO kinase 3	ProteinCodingRNA	9.60581	9.97083	10.2085	9.58909	10.1556	10.2091	9.92839	9.98459	0.0562026	0.79474	0.986021
ENSOCUT00000021897	ENSOCUG00000025898	BICDL1	BICD family like cargo adaptor 1	ProteinCodingRNA	8.49561	8.95348	8.96893	9.00506	8.89382	8.52773	8.80601	8.80887	0.00286198	0.990969	0.999819
ENSOCUT00000007118	ENSOCUG00000022310	SH2D5	SH2 domain containing 5	ProteinCodingRNA	8.78255	7.64315	5.55692	8.21022	3.33754	3.34712	7.32754	4.96496	-2.36258	0.475506	0.986021
ENSOCUT00000021894	ENSOCUG00000025362	RND1	Rho family GTPase 1	ProteinCodingRNA	4.8093	4.9062	5.37354	5.23919	6.16684	6.25641	5.02968	5.88748	0.857803	0.0236182	0.474325
ENSOCUT00000005876	ENSOCUG00000005874	YES1	YES proto-oncogene 1, Src family tyrosine kinase	ProteinCodingRNA	10.5044	10.3246	10.363	10.435	10.0131	10.0954	10.3973	10.1812	-0.216179	0.173536	0.911068
MSTRG.18306.1	---	---	---	Predicted_LncRNA	8.60297	8.34802	8.43466	8.94233	8.75539	8.9136	8.46188	8.87044	0.408559	0.00286001	0.168195
ENSOCUT00000000917	ENSOCUG00000000918	TLX3	T cell leukemia homeobox 3	ProteinCodingRNA	0	0	0	0	3.18535	0	0	1.06178	1.06178	0.322231	0.986021
ENSOCUT00000008713	ENSOCUG00000008715	---	---	ProteinCodingRNA	7.28971	7.39161	7.52497	7.49092	7.68259	7.8092	7.4021	7.6609	0.258805	0.13204	0.857513
MSTRG.8169.1	---	---	---	Predicted_LncRNA	0	0	0	0	0	5.23667	0	1.74556	1.74556	0.0715328	0.728445
ENSOCUT00000018705	ENSOCUG00000018705	RF00093	small nucleolar RNA, C/D box 18B	OtherNonCodingRNA	5.25463	5.16923	5.06997	5.54581	5.40925	4.72734	5.16461	5.22746	0.0628535	0.773905	0.986021
ENSOCUT00000014445	ENSOCUG00000014447	---	---	ProteinCodingRNA	9.87218	10.135	9.70539	10.1672	9.11534	8.93179	9.90419	9.40478	-0.499413	0.243265	0.963347
ENSOCUT00000014446	ENSOCUG00000014446	TMEM212	transmembrane protein 212	ProteinCodingRNA	0	0	0	0	0	2.02102	0	0.673674	0.673674	0.532259	0.986021
ENSOCUT00000025821	ENSOCUG00000017094	SPAG6	sperm associated antigen 6	ProteinCodingRNA	4.0187	3.58431	3.47433	3.79902	0	0	3.69245	1.26634	-2.42611	0.326459	0.986021
ENSOCUT00000014441	ENSOCUG00000027815	---	---	ProteinCodingRNA	5.22234	6.86966	6.98716	6.23907	7.47667	7.56697	6.35972	7.09424	0.734521	0.231465	0.952743
ENSOCUT00000014442	ENSOCUG00000014432	ENPP3	ectonucleotide pyrophosphatase/phosphodiesterase 3	ProteinCodingRNA	10.9846	11.7323	11.5466	10.3275	11.4608	11.675	11.4212	11.1544	-0.266752	0.596668	0.986021
ENSOCUT00000014443	ENSOCUG00000014443	SERPINB7	serpin family B member 7	ProteinCodingRNA	11.956	12.7253	13.1803	11.8583	13.9837	13.6481	12.6205	13.1633	0.542811	0.172234	0.910728
ENSOCUT00000015964	ENSOCUG00000015962	ASZ1	Ankyrin repeat, SAM and basic leucine zipper domain-containing protein 1	ProteinCodingRNA	1.82162	0	0	0	0	0	0.607208	0	-0.607208	0.581472	0.986021
ENSOCUT00000008925	ENSOCUG00000008925	ADAT2	adenosine deaminase, tRNA specific 2	ProteinCodingRNA	6.61716	6.30308	6.83925	7.04638	6.67538	7.03897	6.5865	6.92024	0.333746	0.178948	0.914954
ENSOCUT00000014448	ENSOCUG00000014451	---	---	ProteinCodingRNA	10.054	9.77572	9.07795	10.0354	7.76545	7.44565	9.6359	8.41551	-1.22039	0.350727	0.986021
ENSOCUT00000014449	ENSOCUG00000014452	SERPINB2	serpin family B member 2	ProteinCodingRNA	10.9858	11.3414	11.295	11.4386	11.7626	11.6143	11.2074	11.6052	0.397776	0.00883662	0.314394
ENSOCUT00000031476	ENSOCUG00000004314	TRPM1	transient receptor potential cation channel subfamily M member 1	ProteinCodingRNA	11.2653	9.98371	8.61087	10.6231	9.03967	7.83519	9.95329	9.166	-0.787292	0.454577	0.986021
ENSOCUT00000031477	ENSOCUG00000000214	ELP6	elongator acetyltransferase complex subunit 6	ProteinCodingRNA	6.89833	6.69973	6.3361	6.746	6.66102	6.51951	6.64472	6.64218	-0.00254619	0.920974	0.999819
ENSOCUT00000031471	ENSOCUG00000027902	---	---	ProteinCodingRNA	1.82162	0	2.1281	2.31475	0	0	1.31657	0.771584	-0.544989	0.808422	0.986021
ENSOCUT00000031472	ENSOCUG00000017017	CARNMT1	carnosine N-methyltransferase 1	ProteinCodingRNA	8.99096	8.76084	8.19014	9.07851	8.2461	8.53171	8.64731	8.61877	-0.0285423	0.934309	0.999819
ENSOCUT00000018252	ENSOCUG00000018252	RF00003	---	OtherNonCodingRNA	0	1.58449	0	0	0	0	0.528162	0	-0.528162	0.648025	0.986021
ENSOCUT00000001167	ENSOCUG00000001168	LUZP1	leucine zipper protein 1	ProteinCodingRNA	10.3165	10.2172	10.1122	10.4949	9.67374	9.81093	10.2153	9.99318	-0.222125	0.460332	0.986021
MSTRG.6171.1	---	---	---	Predicted_LncRNA	10.9375	10.9084	1.69938	9.86755	8.42668	9.94531	7.84845	9.41318	1.56473	0.645106	0.986021
ENSOCUT00000027961	ENSOCUG00000022348	ZBTB7C	zinc finger and BTB domain containing 7C	ProteinCodingRNA	9.75293	10.092	9.97556	9.61492	10.7359	10.593	9.94018	10.3146	0.37443	0.134975	0.866024
ENSOCUT00000027805	ENSOCUG00000008806	SPINK6	serine peptidase inhibitor, Kazal type 6	ProteinCodingRNA	5.37701	2.58437	2.45817	1.57899	1.59655	0	3.47318	1.05851	-2.41467	0.00709236	0.280267
ENSOCUT00000017069	ENSOCUG00000017068	ZNF608	zinc finger protein 608	ProteinCodingRNA	10.9579	10.8781	10.9447	11.0071	9.48899	9.82397	10.9269	10.1067	-0.820215	0.0770739	0.737209
ENSOCUT00000017068	ENSOCUG00000026247	---	---	ProteinCodingRNA	5.40604	6.22812	6.35603	6.25793	6.39217	6.86061	5.99673	6.50357	0.506839	0.177137	0.914954
ENSOCUT00000017067	ENSOCUG00000017056	PKN2	protein kinase N2	ProteinCodingRNA	11.1024	11.2039	11.19	11.3214	11.333	11.3833	11.1654	11.3459	0.180495	0.0119546	0.356487
ENSOCUT00000001161	ENSOCUG00000001161	HYPK	huntingtin-interacting protein K	ProteinCodingRNA	6.64179	6.26608	6.65847	6.83659	6.91201	6.6859	6.52211	6.8115	0.289388	0.200152	0.936313
ENSOCUT00000008842	ENSOCUG00000008846	THAP3	THAP domain containing 3	ProteinCodingRNA	5.04908	5.64316	5.71959	5.74608	5.26481	5.61235	5.47061	5.54108	0.070472	0.849735	0.990131
ENSOCUT00000017063	ENSOCUG00000017060	GTF3C2	general transcription factor IIIC subunit 2	ProteinCodingRNA	11.0516	11.0586	11.1513	11.0844	10.8877	10.7379	11.0872	10.9033	-0.183843	0.148231	0.882572
ENSOCUT00000014161	ENSOCUG00000014164	---	---	ProteinCodingRNA	10.3607	10.5852	10.7495	10.4131	10.723	10.5515	10.5651	10.5625	-0.00260228	0.97343	0.999819
ENSOCUT00000017061	ENSOCUG00000017057	SRPRA	SRP receptor alpha subunit	ProteinCodingRNA	11.9563	11.8565	11.9558	11.893	12.0628	12.0009	11.9229	11.9856	0.0626882	0.460264	0.986021
ENSOCUT00000027809	ENSOCUG00000027869	---	---	OtherNonCodingRNA	4.8093	4.7542	3.14838	4.07902	3.4752	3.48487	4.23729	3.6797	-0.557595	0.230303	0.95251
MSTRG.10000.1	---	---	---	Predicted_LncRNA	5.76103	4.69975	4.8627	5.31318	5.14613	6.29439	5.10783	5.58457	0.476737	0.331065	0.986021
ENSOCUT00000030571	ENSOCUG00000022906	PPIL2	peptidylprolyl isomerase like 2	ProteinCodingRNA	10.8695	10.9965	10.934	11.1439	10.7427	10.7144	10.9333	10.867	-0.066278	0.726885	0.986021
MSTRG.3718.1	---	---	---	Predicted_LncRNA	7.48607	7.53845	7.83294	7.33093	8.09409	7.33157	7.61915	7.58553	-0.0336232	0.981706	0.999819
ENSOCUT00000024563	ENSOCUG00000027604	MLLT6	MLLT6, PHD finger containing	ProteinCodingRNA	9.16668	9.05457	9.21248	9.3242	9.69856	9.46255	9.14458	9.4951	0.350523	0.0126197	0.36173
ENSOCUT00000011407	ENSOCUG00000011399	TTLL5	tubulin tyrosine ligase like 5	ProteinCodingRNA	10.0121	10.0464	9.99952	10.0625	10.181	10.09	10.0194	10.1112	0.0917916	0.262994	0.970468
ENSOCUT00000024125	ENSOCUG00000027661	RNF44	ring finger protein 44	ProteinCodingRNA	7.25821	7.614	7.92254	7.90993	7.39227	7.27571	7.59825	7.52597	-0.0722799	0.809282	0.986021
ENSOCUT00000024127	ENSOCUG00000026685	---	Oryctolagus cuniculus toll-like receptor 11 (LOC100347922), mRNA.	ProteinCodingRNA	5.28621	5.42557	4.74671	4.07902	4.60158	4.1138	5.15283	4.2648	-0.888031	0.0229578	0.467561
ENSOCUT00000008153	ENSOCUG00000008153	---	---	ProteinCodingRNA	0	1.58449	1.08665	2.31475	3.01518	2.83136	0.890379	2.72043	1.83005	0.0405136	0.588773
ENSOCUT00000003443	ENSOCUG00000003441	FAAH	fatty acid amide hydrolase	ProteinCodingRNA	7.8716	7.42556	7.2006	8.08909	6.91201	7.00502	7.49925	7.33538	-0.163875	0.823894	0.986021
ENSOCUT00000030253	ENSOCUG00000027424	PRPF38B	pre-mRNA processing factor 38B	ProteinCodingRNA	10.5128	10.4245	10.185	10.3497	10.4778	10.4511	10.3741	10.4262	0.0520676	0.712987	0.986021
ENSOCUT00000011404	ENSOCUG00000011405	---	---	ProteinCodingRNA	8.94718	9.03546	9.46275	8.81759	10.1466	10.2459	9.14847	9.7367	0.588234	0.0623732	0.695811
ENSOCUT00000030257	ENSOCUG00000028032	TUBA1C	tubulin alpha 1c	ProteinCodingRNA	13.7951	13.4303	12.9018	13.8992	12.5941	12.7514	13.3757	13.0816	-0.294145	0.588546	0.986021
ENSOCUT00000030255	ENSOCUG00000023149	---	---	ProteinCodingRNA	6.78131	6.95349	6.72128	6.97978	7.10468	7.23723	6.81869	7.10723	0.288536	0.130114	0.854465
ENSOCUT00000029364	ENSOCUG00000005002	RNF207	ring finger protein 207	ProteinCodingRNA	0.883565	0	2.45817	1.99327	3.60086	2.6083	1.11391	2.73415	1.62023	0.141608	0.872298
ENSOCUT00000017706	ENSOCUG00000017706	ATL1	atlastin GTPase 1	ProteinCodingRNA	7.82398	8.24722	8.39186	7.87371	8.10474	8.47083	8.15435	8.14976	-0.00459342	0.996708	0.999819
ENSOCUT00000023047	ENSOCUG00000025370	ARRB2	arrestin beta 2	ProteinCodingRNA	8.52569	8.67171	8.92291	8.60576	8.85651	8.85127	8.70677	8.77118	0.0644063	0.710002	0.986021
ENSOCUT00000001169	ENSOCUG00000001169	RGS5	regulator of G protein signaling 5	ProteinCodingRNA	8.67929	9.20874	10.1795	8.56091	10.3782	10.1378	9.35583	9.69228	0.336452	0.448514	0.986021
ENSOCUT00000011909	ENSOCUG00000011913	GPN3	GPN-loop GTPase 3	ProteinCodingRNA	8.8815	8.69973	8.44865	8.75923	8.77552	8.60532	8.67662	8.71336	0.0367333	0.875023	0.993106
MSTRG.2246.1	---	---	---	Predicted_LncRNA	0	3.32129	2.95286	3.89852	3.01518	4.83433	2.09138	3.91601	1.82463	0.13534	0.866024
ENSOCUT00000024306	ENSOCUG00000022928	RPL11	ribosomal protein L11	ProteinCodingRNA	13.9967	13.9823	13.9838	13.9345	13.9244	13.7683	13.9876	13.8757	-0.111823	0.203862	0.938709
ENSOCUT00000008900	ENSOCUG00000008900	UBE2D4	ubiquitin conjugating enzyme E2 D4 (putative)	ProteinCodingRNA	7.15935	7.49114	8.08062	7.26721	7.82462	7.72132	7.57704	7.60438	0.0273445	0.996372	0.999819
ENSOCUT00000017705	ENSOCUG00000017704	TBC1D23	TBC1 domain family member 23	ProteinCodingRNA	11.2995	11.1667	10.9643	11.3124	10.8946	10.8711	11.1435	11.026	-0.117497	0.528304	0.986021
ENSOCUT00000011907	ENSOCUG00000011908	ARPC3	actin related protein 2/3 complex subunit 3	ProteinCodingRNA	9.86958	9.63591	9.56047	9.93061	9.41606	9.68077	9.68865	9.67581	-0.0128387	0.980555	0.999819
MSTRG.9210.2	---	---	---	Predicted_LncRNA	11.4378	11.1866	11.2551	11.3535	11.4452	11.2417	11.2932	11.3468	0.0536063	0.652379	0.986021
ENSOCUT00000016437	ENSOCUG00000016437	---	---	ProteinCodingRNA	0	2.58437	2.45817	1.57899	3.4752	1.60366	1.68085	2.21928	0.538437	0.663313	0.986021
ENSOCUT00000000204	ENSOCUG00000000204	---	---	ProteinCodingRNA	0	1.58449	1.69938	1.99327	1.59655	1.60366	1.09462	1.73116	0.636541	0.575215	0.986021
ENSOCUT00000002175	ENSOCUG00000002178	NRM	nurim	ProteinCodingRNA	6.88808	6.80665	6.67443	7.05718	5.87502	6.50338	6.78972	6.47853	-0.311189	0.494144	0.986021
ENSOCUT00000002173	ENSOCUG00000002174	TEX12	testis expressed 12	ProteinCodingRNA	3.68134	2.80674	2.1281	2.57749	4.82408	3.48487	2.87206	3.62881	0.756754	0.263481	0.970468
ENSOCUT00000002172	ENSOCUG00000002172	PPP1R18	protein phosphatase 1 regulatory subunit 18	ProteinCodingRNA	8.67034	8.67171	8.96244	8.49488	8.78548	8.9348	8.76817	8.73839	-0.0297811	0.893343	0.996829
ENSOCUT00000002171	ENSOCUG00000002171	TRAPPC6B	trafficking protein particle complex 6B	ProteinCodingRNA	6.57942	7.49914	6.81065	6.81128	6.71761	5.98171	6.96307	6.50354	-0.459534	0.203433	0.938709
ENSOCUT00000032368	ENSOCUG00000028373	RF00012	---	OtherNonCodingRNA	0	0	0	0	0	1.01405	0	0.338016	0.338016	0.80659	0.986021
ENSOCUT00000008904	ENSOCUG00000008908	KCNA2	Potassium voltage-gated channel subfamily A member 2	ProteinCodingRNA	4.46749	3.90623	4.55312	3.57674	4.47599	4.48613	4.30894	4.17962	-0.129324	0.832652	0.987616
ENSOCUT00000002178	ENSOCUG00000002176	PNN	pinin, desmosome associated protein	ProteinCodingRNA	9.61672	9.84321	9.6819	9.67929	9.69328	9.20284	9.71394	9.52513	-0.188808	0.324842	0.986021
MSTRG.7398.2	---	---	---	Predicted_LncRNA	8.81268	8.81627	8.59419	8.72914	8.67907	8.40292	8.74105	8.60371	-0.137337	0.378851	0.986021
MSTRG.7398.3	---	---	---	Predicted_LncRNA	7.15079	7.09732	7.2006	7.22949	6.86268	6.70012	7.14957	6.93076	-0.21881	0.350874	0.986021
MSTRG.7398.1	---	---	---	Predicted_LncRNA	8.33502	8.3167	8.57731	8.86756	8.27467	8.35431	8.40968	8.49885	0.0891675	0.610039	0.986021
ENSOCUT00000033186	ENSOCUG00000029667	---	---	ProteinCodingRNA	10.6111	10.6223	10.6277	10.1821	10.8126	10.9807	10.6204	10.6584	0.038082	0.725229	0.986021
ENSOCUT00000016338	ENSOCUG00000016330	NOA1	nitric oxide associated 1	ProteinCodingRNA	10.6228	10.0327	9.94464	10.1685	9.95396	9.82397	10.2	9.98213	-0.217914	0.273777	0.97656
MSTRG.10726.1	---	---	---	Predicted_LncRNA	5.8053	2.58437	1.69938	1.99327	2.59943	0	3.36302	1.5309	-1.83211	0.0417035	0.597152
MSTRG.15278.1	---	---	---	Predicted_LncRNA	12.7133	12.6108	12.5344	12.704	12.5197	12.4641	12.6195	12.5626	-0.0568956	0.616859	0.986021
MSTRG.9592.1	---	---	---	Predicted_LncRNA	7.27405	7.31217	7.24402	7.3574	7.0616	7.57471	7.27675	7.33124	0.0544891	0.731689	0.986021
ENSOCUT00000016336	ENSOCUG00000016329	DENND5A	DENN domain containing 5A	ProteinCodingRNA	11.8271	11.9092	12.0475	11.6915	12.0341	12.1061	11.9279	11.9439	0.0159696	0.870603	0.992967
ENSOCUT00000016337	ENSOCUG00000016320	ATP8B2	ATPase phospholipid transporting 8B2	ProteinCodingRNA	12.2317	12.4505	12.7354	12.1588	12.4522	12.7201	12.4725	12.4437	-0.0288034	0.901618	0.998442
ENSOCUT00000016330	ENSOCUG00000016332	CDC73	cell division cycle 73	ProteinCodingRNA	10.9137	11.0934	11.0356	11.1591	11.0237	10.9296	11.0142	11.0374	0.0232076	0.81764	0.986021
ENSOCUT00000006056	ENSOCUG00000006052	SOS2	SOS Ras/Rho guanine nucleotide exchange factor 2	ProteinCodingRNA	11.1833	11.3464	11.4485	11.2144	11.1658	11.154	11.326	11.1781	-0.147962	0.140195	0.872192
ENSOCUT00000022812	ENSOCUG00000025750	---	---	ProteinCodingRNA	4.67259	4.80667	5.20796	4.45087	5.0168	4.88499	4.89574	4.78422	-0.11152	0.781685	0.986021
ENSOCUT00000006509	ENSOCUG00000006512	DCUN1D5	defective in cullin neddylation 1 domain containing 5	ProteinCodingRNA	8.62475	8.38731	8.2711	8.39193	8.35714	8.34076	8.42772	8.36328	-0.0644414	0.614138	0.986021
ENSOCUT00000012138	ENSOCUG00000012139	ZMYND12	zinc finger MYND-type containing 12	ProteinCodingRNA	5.48981	4.99931	4.55312	5.48308	5.6317	5.91014	5.01408	5.67497	0.660892	0.0940997	0.780486
ENSOCUT00000012139	ENSOCUG00000023248	---	---	OtherNonCodingRNA	2.13084	1.58449	2.45817	1.57899	7.36596	7.05012	2.05783	5.33169	3.27386	3.55198e-05	0.0085166
MSTRG.10830.1	---	---	---	Predicted_LncRNA	4.52156	4.24725	4.32946	4.94551	5.26481	4.72734	4.36609	4.97922	0.613131	0.0930568	0.77809
ENSOCUT00000022818	ENSOCUG00000011872	---	---	ProteinCodingRNA	4.52156	9.44637	9.84238	5.63506	8.27938	5.0271	7.93677	6.31385	-1.62293	0.152152	0.884032
ENSOCUT00000012135	ENSOCUG00000012134	RNF175	ring finger protein 175	ProteinCodingRNA	3.10507	2.80674	2.95286	1.57899	2.82223	2.83136	2.95489	2.41086	-0.544032	0.499639	0.986021
ENSOCUT00000012132	ENSOCUG00000012132	CHST2	carbohydrate sulfotransferase 2	ProteinCodingRNA	8.95211	8.13372	7.81145	8.87674	6.71761	7.13629	8.29909	7.57688	-0.722211	0.410487	0.986021
ENSOCUT00000012131	ENSOCUG00000012126	XPOT	exportin for tRNA	ProteinCodingRNA	12.6174	12.3042	12.0099	12.467	11.89	11.93	12.3105	12.0957	-0.214861	0.363972	0.986021
ENSOCUT00000029729	ENSOCUG00000002846	PSME1	proteasome activator subunit 1	ProteinCodingRNA	9.6383	10.0327	10.1725	9.84746	10.0438	10.1154	9.94782	10.0022	0.0544158	0.811806	0.986021
ENSOCUT00000029098	ENSOCUG00000024773	POLR1E	RNA polymerase I subunit E	ProteinCodingRNA	9.24912	9.38083	9.28444	9.55899	9.46853	9.17257	9.3048	9.40003	0.0952311	0.471783	0.986021
ENSOCUT00000022866	ENSOCUG00000026526	PPM1E	protein phosphatase, Mg2+/Mn2+ dependent 1E	ProteinCodingRNA	7.92775	7.74748	7.78229	7.54566	7.59468	7.71433	7.81917	7.61822	-0.200949	0.177269	0.914954
ENSOCUT00000029721	ENSOCUG00000008579	VASH2	vasohibin 2	ProteinCodingRNA	8.76304	8.734	8.73021	8.65993	8.10474	8.80598	8.74242	8.52355	-0.218867	0.374613	0.986021
ENSOCUT00000026040	ENSOCUG00000026536	---	---	ProteinCodingRNA	0	0	2.1281	0	0	0	0.709366	0	-0.709366	0.516882	0.986021
ENSOCUT00000026043	ENSOCUG00000012159	TMEM132E	transmembrane protein 132E	ProteinCodingRNA	4.35286	4.85729	5.9729	3.69216	0	0	5.06102	1.23072	-3.8303	0.019149	0.435592
ENSOCUT00000029097	ENSOCUG00000022861	FBXO24	F-box protein 24	ProteinCodingRNA	5.40604	5.45873	5.11745	5.60592	4.82408	5.27516	5.32741	5.23505	-0.0923557	0.843708	0.989085
ENSOCUT00000029095	ENSOCUG00000027762	---	---	OtherNonCodingRNA	8.88408	8.73061	8.84396	9.01341	8.68618	8.88588	8.81955	8.86183	0.0422779	0.736952	0.986021
ENSOCUT00000026046	ENSOCUG00000010019	EXOC3L1	exocyst complex component 3 like 1	ProteinCodingRNA	0	0	1.69938	4.94551	5.1043	6.53545	0.566458	5.52842	4.96196	3.29533e-07	0.000129931
ENSOCUT00000014866	ENSOCUG00000014875	FAM241B	family with sequence similarity 241 member B	ProteinCodingRNA	0	0	0	0	0	2.02102	0	0.673674	0.673674	0.532259	0.986021
ENSOCUT00000003022	ENSOCUG00000003024	PANX3	pannexin 3	ProteinCodingRNA	3.24021	5.88194	5.99849	3.99159	5.37447	5.69984	5.04021	5.02197	-0.0182433	0.72524	0.986021
ENSOCUT00000014864	ENSOCUG00000014862	BIN1	bridging integrator 1	ProteinCodingRNA	7.9914	7.97083	8.4853	7.79842	7.86275	8.38982	8.14918	8.017	-0.132179	0.622765	0.986021
ENSOCUT00000022864	ENSOCUG00000026058	---	---	ProteinCodingRNA	3.10507	2.32136	2.95286	1.99327	1.0087	3.34712	2.79309	2.11636	-0.676731	0.622385	0.986021
ENSOCUT00000011814	ENSOCUG00000011814	SESN1	sestrin 1	ProteinCodingRNA	8.74327	8.92113	8.69152	8.97404	9.09145	9.09669	8.7853	9.05406	0.268754	0.0290596	0.52559
ENSOCUT00000003179	ENSOCUG00000003182	TMEM140	transmembrane protein 140	ProteinCodingRNA	6.99706	7.56915	7.462	7.05718	7.31185	7.44565	7.34273	7.27156	-0.0711716	0.737052	0.986021
ENSOCUT00000022632	ENSOCUG00000025176	---	---	OtherNonCodingRNA	7.40208	7.40017	7.22247	7.42571	7.23639	7.1977	7.34158	7.2866	-0.0549775	0.745181	0.986021
ENSOCUT00000007584	ENSOCUG00000007579	ATRX	ATRX, chromatin remodeler	ProteinCodingRNA	12.0096	12.5162	12.4911	11.9654	11.8375	11.9345	12.339	11.9125	-0.426514	0.00806004	0.298558
ENSOCUT00000006414	ENSOCUG00000006416	NR0B2	nuclear receptor subfamily 0 group B member 2	ProteinCodingRNA	0	0	0	0	0	2.34434	0	0.781447	0.781447	0.46385	0.986021
ENSOCUT00000011819	ENSOCUG00000005809	FKTN	fukutin	ProteinCodingRNA	9.24511	9.09732	9.34054	9.29254	9.19722	9.00519	9.22766	9.16498	-0.0626758	0.658105	0.986021
ENSOCUT00000003020	ENSOCUG00000003021	CERKL	ceramide kinase like	ProteinCodingRNA	6.52751	6.26608	6.89481	7.36612	6.18702	7.11522	6.5628	6.88946	0.326654	0.302049	0.983233
ENSOCUT00000006412	ENSOCUG00000012081	CACNB1	voltage-dependent L-type calcium channel subunit beta-1	ProteinCodingRNA	8.65228	8.93593	8.76417	9.22706	7.83744	7.84802	8.78412	8.30417	-0.479951	0.417714	0.986021
ENSOCUT00000003173	ENSOCUG00000003175	---	---	ProteinCodingRNA	3.94146	0	1.69938	3.45128	0	0	1.88028	1.15043	-0.729854	0.749631	0.986021
ENSOCUT00000008557	ENSOCUG00000008555	PLEKHM1	pleckstrin homology and RUN domain containing M1	ProteinCodingRNA	10.8055	10.8865	11.2236	10.8843	11.2563	11.1802	10.9719	11.107	0.135095	0.438586	0.986021
ENSOCUT00000021599	ENSOCUG00000013415	FLI1	Fli-1 proto-oncogene, ETS transcription factor	ProteinCodingRNA	9.4953	10.2197	10.1383	9.28796	10.4778	10.6772	9.9511	10.1476	0.196545	0.456587	0.986021
ENSOCUT00000019262	ENSOCUG00000019262	---	---	OtherNonCodingRNA	2.95595	2.32136	2.45817	1.99327	2.82223	2.83136	2.57849	2.54895	-0.0295405	0.976949	0.999819
ENSOCUT00000003754	ENSOCUG00000003752	PHTF1	putative homeodomain transcription factor 1	ProteinCodingRNA	9.99194	9.82265	9.87556	9.85057	9.78385	9.69504	9.89672	9.77649	-0.12023	0.235089	0.956857
ENSOCUT00000005574	ENSOCUG00000005577	C15orf62	chromosome 15 open reading frame 62	ProteinCodingRNA	8.39056	7.30307	6.64233	7.54566	6.26504	6.76917	7.44532	6.85996	-0.585365	0.201693	0.937898
ENSOCUT00000024044	ENSOCUG00000023003	RF00003	---	OtherNonCodingRNA	0	0.999643	0	0	0	0	0.333214	0	-0.333214	0.820752	0.986021
ENSOCUT00000003755	ENSOCUG00000003754	RUNX1T1	RUNX1 translocation partner 1	ProteinCodingRNA	10.3049	10.4546	10.583	10.0409	10.7503	11.0124	10.4475	10.6012	0.153696	0.428044	0.986021
ENSOCUT00000025659	ENSOCUG00000021318	---	---	ProteinCodingRNA	4.16177	4.39164	4.80587	4.89822	5.4432	4.98127	4.45309	5.10756	0.654467	0.0868768	0.760837
ENSOCUT00000019260	ENSOCUG00000019260	ocu-mir-302b	ocu-mir-302b	OtherNonCodingRNA	1.82162	0.999643	0	0.99552	2.01302	1.01405	0.940422	1.34086	0.400442	0.777925	0.986021
ENSOCUT00000001999	ENSOCUG00000002000	SGCD	sarcoglycan delta	ProteinCodingRNA	7.43767	7.90618	8.24995	7.09962	7.45187	8.88899	7.8646	7.81349	-0.0511099	0.789137	0.986021
ENSOCUT00000025651	ENSOCUG00000026263	---	---	ProteinCodingRNA	0	4.9062	4.06464	0	0	0	2.99028	0	-2.99028	0.00538616	0.24133
ENSOCUT00000001995	ENSOCUG00000001996	---	---	ProteinCodingRNA	7.65888	7.42556	7.64323	7.63493	7.32101	7.24694	7.57589	7.40096	-0.174925	0.377536	0.986021
ENSOCUT00000001996	ENSOCUG00000001994	LRRC40	leucine rich repeat containing 40	ProteinCodingRNA	7.64067	7.37433	7.39615	7.44229	7.42663	6.8479	7.47038	7.23894	-0.231443	0.367905	0.986021
ENSOCUT00000022604	ENSOCUG00000016257	---	---	ProteinCodingRNA	11.6936	11.6015	11.6506	11.4566	11.2998	11.4817	11.6486	11.4127	-0.235863	0.00837474	0.305747
ENSOCUT00000001990	ENSOCUG00000001986	PLCD4	phospholipase C delta 4	ProteinCodingRNA	6.38893	4.16925	5.41213	5.03569	5.71745	5.83482	5.32344	5.52932	0.205885	0.967632	0.999819
ENSOCUT00000022602	ENSOCUG00000000947	PM20D2	peptidase M20 domain containing 2	ProteinCodingRNA	8.22932	8.32572	8.24995	7.81761	8.66475	8.1468	8.26833	8.20972	-0.058606	0.94693	0.999819
ENSOCUT00000001992	ENSOCUG00000001995	NRSN1	neurensin 1	ProteinCodingRNA	2.78963	4.08679	4.24647	3.69216	3.01518	2.6083	3.70763	3.10521	-0.602415	0.316871	0.986021
ENSOCUT00000001993	ENSOCUG00000001990	NAA35	N(alpha)-acetyltransferase 35, NatC auxiliary subunit	ProteinCodingRNA	10.3579	10.2484	10.1426	10.3617	9.97732	10.1417	10.2497	10.1602	-0.0894118	0.554755	0.986021
ENSOCUT00000029549	ENSOCUG00000021422	AARS2	alanyl-tRNA synthetase 2, mitochondrial	ProteinCodingRNA	8.59037	8.49514	8.35272	8.54564	8.45608	8.37217	8.47941	8.45796	-0.0214464	0.85097	0.990131
ENSOCUT00000025386	ENSOCUG00000023998	---	---	OtherNonCodingRNA	1.82162	1.58449	0	0	0	0	1.13537	0	-1.13537	0.358791	0.986021
ENSOCUT00000025385	ENSOCUG00000022060	---	---	ProteinCodingRNA	3.36376	2.58437	0	3.31385	0	0	1.98271	1.10462	-0.878092	0.759544	0.986021
ENSOCUT00000012548	ENSOCUG00000012551	DESI2	desumoylating isopeptidase 2	ProteinCodingRNA	11.4699	11.0396	10.7876	11.23	10.5301	10.7525	11.099	10.8375	-0.261515	0.307858	0.984896
ENSOCUT00000025389	ENSOCUG00000023893	RF00100	---	OtherNonCodingRNA	3.24021	2.99938	2.45817	3.57674	2.33582	3.19481	2.89925	3.03579	0.136535	0.782485	0.986021
ENSOCUT00000012544	ENSOCUG00000012544	KIRREL3	kirre like nephrin family adhesion molecule 3	ProteinCodingRNA	6.88808	7.16922	6.83925	6.53028	6.18702	6.07194	6.96552	6.26308	-0.702434	0.00352281	0.186028
ENSOCUT00000029541	ENSOCUG00000023902	PELO	pelota mRNA surveillance and ribosome rescue factor	ProteinCodingRNA	8.87632	9.05457	9.05679	8.90991	8.68972	8.66089	8.99589	8.75351	-0.242389	0.0763225	0.737087
ENSOCUT00000012542	ENSOCUG00000012540	CATSPERE	catsper channel auxiliary subunit epsilon	ProteinCodingRNA	1.82162	4.24725	5.6242	4.63524	4.87473	4.34851	3.89769	4.61949	0.721799	0.941423	0.999819
ENSOCUT00000029543	ENSOCUG00000021588	---	---	ProteinCodingRNA	2.13084	0.999643	2.1281	1.57899	3.4752	3.72627	1.75286	2.92682	1.17396	0.112925	0.815823
ENSOCUT00000029542	ENSOCUG00000026489	RF00274	---	OtherNonCodingRNA	1.42753	1.58449	2.1281	0	2.82223	3.0245	1.71337	1.94891	0.235538	0.485771	0.986021
ENSOCUT00000029893	ENSOCUG00000026706	RF00020	---	OtherNonCodingRNA	0	0	0	0	0	2.34434	0	0.781447	0.781447	0.46385	0.986021
ENSOCUT00000029890	ENSOCUG00000021741	---	---	ProteinCodingRNA	11.5106	11.4996	11.6359	11.7333	11.4747	11.3828	11.5487	11.5303	-0.0184588	0.926697	0.999819
ENSOCUT00000029896	ENSOCUG00000011247	FGG	fibrinogen gamma chain	ProteinCodingRNA	0	0	2.45817	2.57749	0	3.0245	0.819391	1.86733	1.04794	0.508401	0.986021
ENSOCUT00000021779	ENSOCUG00000021483	RF01191	small nucleolar RNA, C/D box 121A	OtherNonCodingRNA	3.36376	3.16929	2.95286	2.99215	3.01518	2.83136	3.16197	2.94623	-0.21574	0.681281	0.986021
ENSOCUT00000021777	ENSOCUG00000026385	---	---	ProteinCodingRNA	4.67259	4.69975	3.85655	4.51498	4.47599	4.61177	4.40963	4.53425	0.124614	0.873976	0.993072
ENSOCUT00000021775	ENSOCUG00000012460	PLK3	polo like kinase 3	ProteinCodingRNA	11.4819	11.5336	10.8661	12.0182	10.6284	11.0364	11.2939	11.2277	-0.0662214	0.94442	0.999819
MSTRG.13851.2	---	---	---	Predicted_LncRNA	4.46749	4.52288	4.15842	5.23919	4.18631	3.83334	4.38293	4.41961	0.0366819	0.761684	0.986021
ENSOCUT00000009826	ENSOCUG00000009822	SFMBT1	Scm like with four mbt domains 1	ProteinCodingRNA	8.66134	8.77078	8.93621	8.99667	8.75539	8.68253	8.78944	8.81153	0.0220893	0.865773	0.992575
ENSOCUT00000014611	ENSOCUG00000014612	ITFG2	integrin alpha FG-GAP repeat containing 2	ProteinCodingRNA	8.51906	8.51104	8.81185	8.81759	8.71078	8.60532	8.61398	8.71123	0.0972491	0.524693	0.986021
ENSOCUT00000030393	ENSOCUG00000015577	C3orf20	chromosome 3 open reading frame 20	ProteinCodingRNA	0	3.80669	1.08665	3.31385	4.18631	4.55032	1.63111	4.01683	2.38571	0.15866	0.89397
ENSOCUT00000021119	ENSOCUG00000028047	---	---	ProteinCodingRNA	11.5867	11.6722	11.6934	11.6767	11.4875	11.4165	11.6507	11.5269	-0.123857	0.25594	0.969868
ENSOCUT00000014613	ENSOCUG00000014618	RGS10	regulator of G protein signaling 10	ProteinCodingRNA	7.80775	8.36123	8.31757	7.75262	8.36601	8.47083	8.16219	8.19649	0.034301	0.859753	0.991171
ENSOCUT00000004625	ENSOCUG00000004620	ITIH2	inter-alpha-trypsin inhibitor heavy chain H2 precursor	ProteinCodingRNA	3.47757	4.39164	4.48235	3.99159	4.77159	4.1138	4.11718	4.29232	0.17514	0.742044	0.986021
ENSOCUT00000011052	ENSOCUG00000011053	TEPP	testis, prostate and placenta expressed	ProteinCodingRNA	3.24021	3.90623	4.15842	2.79967	3.71645	2.34434	3.76828	2.95349	-0.814797	0.232881	0.953868
ENSOCUT00000008558	ENSOCUG00000008561	IGFBP2	insulin like growth factor binding protein 2	ProteinCodingRNA	10.5417	11.5568	11.3551	10.1113	10.217	11.1114	11.1512	10.4799	-0.671264	0.0638908	0.70114
ENSOCUT00000007772	ENSOCUG00000007774	TNFAIP1	TNF alpha induced protein 1	ProteinCodingRNA	11.1563	11.2939	11.3015	11.1697	11.1008	11.2392	11.2505	11.1699	-0.0806361	0.367133	0.986021
ENSOCUT00000014614	ENSOCUG00000014614	---	---	ProteinCodingRNA	1.82162	0	0	0	0	3.34712	0.607208	1.11571	0.508498	0.55852	0.986021
MSTRG.39.1	---	---	---	Predicted_LncRNA	9.87088	9.8804	9.95937	9.91436	10.4096	10.5417	9.90355	10.2886	0.385008	0.0292171	0.525628
ENSOCUT00000024475	ENSOCUG00000003980	TMX1	thioredoxin related transmembrane protein 1	ProteinCodingRNA	10.8485	10.5568	10.4174	10.651	10.2923	10.1585	10.6075	10.3673	-0.240253	0.212502	0.942464
ENSOCUT00000000488	ENSOCUG00000000488	FAM83C	protein FAM83C	ProteinCodingRNA	12.3009	12.1848	11.9199	12.7153	10.7613	10.919	12.1352	11.4652	-0.669997	0.43359	0.986021
ENSOCUT00000000484	ENSOCUG00000000484	---	---	ProteinCodingRNA	8.89436	8.76416	8.83688	9.10998	8.99172	9.22513	8.8318	9.10894	0.277143	0.0203355	0.447104
ENSOCUT00000000487	ENSOCUG00000000486	SPATA5	spermatogenesis associated 5	ProteinCodingRNA	10.0529	9.83376	9.76995	10.0189	10.1414	9.71092	9.88553	9.9571	0.0715719	0.636031	0.986021
ENSOCUT00000017129	ENSOCUG00000017128	NMU	neuromedin U	ProteinCodingRNA	2.38533	0	0	0	0	4.02623	0.795111	1.34208	0.546966	0.541525	0.986021
ENSOCUT00000000481	ENSOCUG00000000482	NUDT6	nudix hydrolase 6	ProteinCodingRNA	8.75742	8.80019	8.61914	8.42984	8.57954	8.47497	8.72558	8.49478	-0.230802	0.0579908	0.678177
ENSOCUT00000000480	ENSOCUG00000000479	PAOX	polyamine oxidase	ProteinCodingRNA	9.44897	9.35684	9.60279	9.31972	9.43517	9.46046	9.46953	9.40512	-0.0644151	0.572698	0.986021
ENSOCUT00000000483	ENSOCUG00000000483	CAPN9	calpain 9	ProteinCodingRNA	1.42753	0	0	1.99327	0	2.34434	0.475843	1.44587	0.970029	0.383045	0.986021
MSTRG.10973.1	---	---	---	Predicted_LncRNA	6.00831	5.75419	5.20796	6.09968	5.68943	5.15645	5.65682	5.64852	-0.0082974	0.999141	0.999819
MSTRG.3528.1	---	---	---	Predicted_LncRNA	7.67686	7.74076	7.68322	8.1408	7.61716	8.1416	7.70028	7.96652	0.266246	0.157943	0.892763
ENSOCUT00000014619	ENSOCUG00000014627	C3orf70	chromosome 3 open reading frame 70	ProteinCodingRNA	9.77397	9.64854	9.71507	9.45047	9.9212	10.1777	9.71253	9.84979	0.13726	0.418305	0.986021
ENSOCUT00000000150	ENSOCUG00000000151	SSMEM1	serine rich single-pass membrane protein 1	ProteinCodingRNA	0	2.58437	2.72661	3.16195	0	0	1.77033	1.05398	-0.716344	0.858601	0.991171
ENSOCUT00000000157	ENSOCUG00000000156	TRAK2	trafficking kinesin protein 2	ProteinCodingRNA	11.722	11.867	11.9241	11.9654	11.6858	11.8999	11.8377	11.8504	0.0126776	0.898111	0.998007
ENSOCUT00000000156	ENSOCUG00000000157	ST3GAL1	ST3 beta-galactoside alpha-2,3-sialyltransferase 1	ProteinCodingRNA	8.76584	8.53456	8.30225	8.6421	8.4685	8.40726	8.53422	8.50595	-0.0282658	0.821388	0.986021
ENSOCUT00000012502	ENSOCUG00000012500	CFAP100	cilia and flagella associated protein 100	ProteinCodingRNA	2.6016	2.32136	4.32946	2.57749	4.18631	3.83334	3.08414	3.53238	0.448241	0.687915	0.986021
ENSOCUT00000000154	ENSOCUG00000000154	IL13	interleukin 13	ProteinCodingRNA	1.42753	2.58437	2.95286	0.99552	0	0	2.32159	0.33184	-1.98975	0.0309632	0.534726
ENSOCUT00000023861	ENSOCUG00000015000	RUNDC3B	RUN domain containing 3B	ProteinCodingRNA	5.82694	5.85728	5.6242	5.71912	5.50881	6.34954	5.76947	5.85916	0.0896834	0.693745	0.986021
ENSOCUT00000000159	ENSOCUG00000000159	RGMB	repulsive guidance molecule BMP co-receptor b	ProteinCodingRNA	10.1686	10.2377	10.647	10.3275	10.4737	10.5844	10.3511	10.4619	0.110775	0.560938	0.986021
MSTRG.1939.1	---	---	---	Predicted_LncRNA	11.4879	11.2725	11.1027	11.558	11.1885	10.7753	11.2877	11.1739	-0.113755	0.700403	0.986021
ENSOCUT00000015632	ENSOCUG00000015638	ZNF518A	zinc finger protein 518A	ProteinCodingRNA	9.77397	9.60847	9.81745	9.80321	9.81011	9.82235	9.73329	9.81189	0.0785977	0.445311	0.986021
MSTRG.14857.1	---	---	---	Predicted_LncRNA	4.8093	4.99931	4.55312	4.7987	5.14613	4.48613	4.78724	4.81032	0.0230813	0.927887	0.999819
ENSOCUT00000003287	ENSOCUG00000000547	SGO2	shugoshin 2	ProteinCodingRNA	8.85014	8.37433	7.69108	8.69495	6.92409	6.95847	8.30519	7.52584	-0.779349	0.269925	0.971256
MSTRG.16225.5	---	---	---	Predicted_LncRNA	9.51543	9.1642	8.90611	9.5146	9.68088	9.78615	9.19524	9.66054	0.465299	0.0216125	0.456359
ENSOCUT00000023558	ENSOCUG00000026282	---	---	ProteinCodingRNA	0	1.58449	2.45817	0	0	0	1.34755	0	-1.34755	0.251588	0.968372
ENSOCUT00000010639	ENSOCUG00000010636	XPNPEP2	X-prolyl aminopeptidase 2	ProteinCodingRNA	4.97349	6.08676	4.62058	5.4175	1.59655	5.27516	5.22694	4.0964	-1.13054	0.536387	0.986021
ENSOCUT00000003281	ENSOCUG00000003273	ITGA2B	integrin alpha-IIb precursor	ProteinCodingRNA	7.9177	7.74748	8.44865	7.3834	8.26995	8.77944	8.03794	8.14426	0.10632	0.63476	0.986021
ENSOCUT00000006679	ENSOCUG00000006677	---	---	OtherNonCodingRNA	7.51301	7.33914	7.42474	7.64928	7.59468	7.38535	7.42563	7.5431	0.117471	0.475585	0.986021
ENSOCUT00000023552	ENSOCUG00000024115	ASGR2	asialoglycoprotein receptor 2	ProteinCodingRNA	5.84825	4.99931	5.44971	6.09968	2.59943	2.83136	5.43242	3.84349	-1.58894	0.45336	0.986021
MSTRG.13060.1	---	---	---	Predicted_LncRNA	11.2707	10.8338	10.5627	11.3107	9.9451	10.2004	10.8891	10.4854	-0.403681	0.421783	0.986021
ENSOCUT00000004816	ENSOCUG00000004817	LSG1	large 60S subunit nuclear export GTPase 1	ProteinCodingRNA	10.1917	10.0828	10.0168	10.0037	10.2664	10.1127	10.0971	10.1276	0.0305058	0.784344	0.986021
ENSOCUT00000010637	ENSOCUG00000010637	MCM5	minichromosome maintenance complex component 5	ProteinCodingRNA	10.3203	9.58425	9.51466	10.2235	8.94212	9.03353	9.80639	9.3997	-0.406692	0.410954	0.986021
MSTRG.17473.1	---	---	---	Predicted_LncRNA	7.99618	8.72721	9.27401	8.13572	8.95099	8.60154	8.6658	8.56275	-0.103051	0.67193	0.986021
ENSOCUT00000004813	ENSOCUG00000004815	BAG2	BCL2 associated athanogene 2	ProteinCodingRNA	6.88808	6.78065	6.88112	5.87382	6.54071	6.79589	6.84995	6.40348	-0.446473	0.17371	0.911068
ENSOCUT00000004811	ENSOCUG00000004809	ZNF451	zinc finger protein 451	ProteinCodingRNA	10.2093	10.2245	10.391	9.99526	10.3891	10.342	10.275	10.2421	-0.0328535	0.867986	0.992646
ENSOCUT00000027397	ENSOCUG00000021442	---	---	ProteinCodingRNA	0	0.999643	0	0	1.0087	2.34434	0.333214	1.11768	0.784464	0.372313	0.986021
MSTRG.19038.2	---	---	---	Predicted_LncRNA	7.96725	7.57672	7.64323	7.80485	7.49298	7.40283	7.72907	7.56689	-0.162179	0.430562	0.986021
MSTRG.19099.1	---	---	---	Predicted_LncRNA	11.5375	10.9887	11.605	11.9129	11.9235	10.9756	11.3771	11.604	0.226896	0.37562	0.986021
ENSOCUT00000027391	ENSOCUG00000022939	---	---	ProteinCodingRNA	4.52156	5.08677	5.25117	5.3488	4.97098	4.83433	4.95317	5.05137	0.0982012	0.802913	0.986021
ENSOCUT00000009857	ENSOCUG00000009850	NPC1	Niemann-Pick C1 protein precursor	ProteinCodingRNA	12.3058	12.173	11.9411	12.2354	12.6219	12.2508	12.1399	12.3693	0.229411	0.164556	0.903179
ENSOCUT00000027024	ENSOCUG00000023811	---	---	ProteinCodingRNA	9.39567	8.84478	8.37242	9.52437	7.30263	7.49541	8.87096	8.10747	-0.763486	0.45272	0.986021
ENSOCUT00000022713	ENSOCUG00000025995	ASB2	ankyrin repeat and SOCS box containing 2	ProteinCodingRNA	4.41131	5.72722	4.68502	3.57674	6.26504	5.23667	4.94118	5.02615	0.084964	0.637663	0.986021
ENSOCUT00000027027	ENSOCUG00000023069	---	---	ProteinCodingRNA	4.0187	4.64317	5.20796	4.45087	4.87473	6.21741	4.62328	5.181	0.557724	0.255578	0.969868
ENSOCUT00000017880	ENSOCUG00000017880	EMSY	EMSY, BRCA2 interacting transcriptional repressor	ProteinCodingRNA	9.85781	10.2341	10.2017	9.85677	10.4331	10.2556	10.0979	10.1818	0.0839413	0.635681	0.986021
ENSOCUT00000017883	ENSOCUG00000017883	ACTL6A	actin like 6A	ProteinCodingRNA	9.37379	8.99929	9.11058	9.20293	8.88458	8.55927	9.16122	8.88226	-0.278958	0.21782	0.94854
ENSOCUT00000017882	ENSOCUG00000017884	VEGFC	vascular endothelial growth factor C	ProteinCodingRNA	8.63091	8.91517	8.99459	7.52246	9.26998	8.92272	8.84689	8.57172	-0.27517	0.789911	0.986021
ENSOCUT00000017885	ENSOCUG00000017882	ANO3	anoctamin 3	ProteinCodingRNA	7.72375	7.383	5.94685	6.46686	5.74493	5.80882	7.01786	6.00687	-1.01099	0.0194999	0.439239
ENSOCUT00000017884	ENSOCUG00000017885	MUSK	muscle associated receptor tyrosine kinase	ProteinCodingRNA	0	4.16925	2.1281	0	3.4752	0	2.09912	1.1584	-0.940715	0.663428	0.986021
ENSOCUT00000017887	ENSOCUG00000017887	NDUFB5	NADH:ubiquinone oxidoreductase subunit B5	ProteinCodingRNA	9.78782	9.65392	9.43726	9.71725	9.6791	9.75755	9.62633	9.71797	0.0916331	0.516537	0.986021
ENSOCUT00000017912	ENSOCUG00000017910	---	---	ProteinCodingRNA	11.1854	11.4826	11.874	10.9195	12.0726	12.3044	11.514	11.7655	0.251537	0.349526	0.986021
ENSOCUT00000000737	ENSOCUG00000000737	NR4A3	nuclear receptor subfamily 4 group A member 3	ProteinCodingRNA	7.73523	8.18911	8.71099	8.18088	8.72466	8.37217	8.21178	8.4259	0.214124	0.548394	0.986021
ENSOCUT00000000736	ENSOCUG00000000738	---	---	ProteinCodingRNA	8.14571	7.383	7.18953	8.01897	7.68259	7.82225	7.57275	7.84127	0.268525	0.487509	0.986021
ENSOCUT00000019423	ENSOCUG00000019423	RF00100	---	OtherNonCodingRNA	2.38533	1.58449	2.45817	1.99327	3.33754	3.34712	2.14266	2.89265	0.749981	0.260577	0.970468
ENSOCUT00000000734	ENSOCUG00000000734	YWHAZ	tyrosine 3-monooxygenase/tryptophan 5-monooxygenase activation protein zeta	ProteinCodingRNA	13.2367	13.448	13.5486	13.3187	13.5686	13.5705	13.4111	13.4859	0.0748257	0.597368	0.986021
ENSOCUT00000007105	ENSOCUG00000007104	RTL9	retrotransposon Gag like 9	ProteinCodingRNA	4.35286	4.45875	3.85655	3.16195	4.18631	4.19635	4.22272	3.8482	-0.374517	0.504587	0.986021
ENSOCUT00000000732	ENSOCUG00000000733	---	---	ProteinCodingRNA	8.74611	8.43392	8.13354	8.58724	8.19719	7.78939	8.43785	8.19127	-0.246582	0.396147	0.986021
ENSOCUT00000007107	ENSOCUG00000007108	GALNT17	polypeptide N-acetylgalactosaminyltransferase 17	ProteinCodingRNA	5.31711	5.75419	5.89331	4.16145	5.26481	4.41896	5.65487	4.61507	-1.03979	0.0204355	0.447969
ENSOCUT00000001883	ENSOCUG00000001888	H2AFZ	H2A histone family member Z	ProteinCodingRNA	9.59482	9.06807	8.62326	9.3855	8.79209	8.92575	9.09538	9.03445	-0.0609361	0.751743	0.986021
MSTRG.19099.2	---	---	---	Predicted_LncRNA	8.80997	10.0654	0	0	8.85335	9.9966	6.29178	6.28332	-0.00846397	0.991172	0.999819
MSTRG.7564.1	---	---	---	Predicted_LncRNA	11.2061	11.0035	11.0114	11.2712	10.4446	10.5681	11.0737	10.7613	-0.312386	0.269085	0.971256
ENSOCUT00000006563	ENSOCUG00000006566	CYBB	cytochrome b-245 heavy chain	ProteinCodingRNA	8.04315	7.91218	6.27461	7.97406	6.22656	5.91014	7.40998	6.70358	-0.706396	0.368053	0.986021
ENSOCUT00000024867	ENSOCUG00000027114	---	---	OtherNonCodingRNA	0	0	0	0	0	1.60366	0	0.534555	0.534555	0.636309	0.986021
ENSOCUT00000001389	ENSOCUG00000001384	RTTN	rotatin	ProteinCodingRNA	10.0914	9.94473	9.85644	9.99666	10.1785	10.0251	9.96419	10.0667	0.102558	0.384224	0.986021
ENSOCUT00000019545	ENSOCUG00000019545	RF00105	---	OtherNonCodingRNA	0.883565	0	0	0	0	0	0.294522	0	-0.294522	0.820752	0.986021
ENSOCUT00000032580	ENSOCUG00000028585	---	---	OtherNonCodingRNA	0.883565	0.999643	1.69938	1.57899	1.0087	0	1.19419	0.862561	-0.331634	0.806023	0.986021
ENSOCUT00000016435	ENSOCUG00000016435	---	---	ProteinCodingRNA	3.85986	3.16929	4.06464	3.31385	4.82408	4.88499	3.69793	4.34097	0.643043	0.204142	0.938709
MSTRG.12674.1	---	---	---	Predicted_LncRNA	11.0424	11.4433	11.7645	11.128	11.7651	11.9708	11.4167	11.6213	0.204588	0.431343	0.986021
ENSOCUT00000028908	ENSOCUG00000022477	ALOX15	arachidonate 15-lipoxygenase	ProteinCodingRNA	2.38533	2.32136	3.96434	2.79967	0	0	2.89035	0.933222	-1.95712	0.216367	0.94854
ENSOCUT00000032223	ENSOCUG00000023748	---	---	ProteinCodingRNA	0	1.99947	0	0	0	0	0.666488	0	-0.666488	0.543154	0.986021
ENSOCUT00000015018	ENSOCUG00000015017	MRPS9	mitochondrial ribosomal protein S9	ProteinCodingRNA	9.00764	8.99929	8.82263	9.20536	9.13365	9.00805	8.94318	9.11569	0.172503	0.160229	0.89695
MSTRG.1133.1	---	---	---	Predicted_LncRNA	8.58403	8.98228	9.13674	9.28796	9.62094	9.04193	8.90102	9.31694	0.415926	0.0638459	0.70114
ENSOCUT00000023737	ENSOCUG00000026619	MYO7B	myosin VIIB	ProteinCodingRNA	5.40604	4.45875	4.74671	0	4.87473	4.61177	4.8705	3.16217	-1.70834	0.478632	0.986021
ENSOCUT00000023739	ENSOCUG00000014917	PDE2A	phosphodiesterase 2A	ProteinCodingRNA	9.80291	10.0854	10.2208	9.16846	10.7588	10.864	10.0364	10.2638	0.227371	0.333679	0.986021
ENSOCUT00000015017	ENSOCUG00000015014	KIF3C	kinesin family member 3C	ProteinCodingRNA	9.6105	9.40443	9.40414	9.70528	9.25332	9.42453	9.47302	9.46104	-0.0119772	0.981521	0.999819
ENSOCUT00000032072	ENSOCUG00000022772	RITA1	RBPJ interacting and tubulin associated 1	ProteinCodingRNA	8.74327	8.53067	8.4579	8.32197	8.43092	8.57864	8.57728	8.44384	-0.133437	0.364115	0.986021
ENSOCUT00000015012	ENSOCUG00000015013	CCNYL1	cyclin Y like 1	ProteinCodingRNA	7.59726	7.76747	7.68322	7.74596	7.33011	7.52766	7.68265	7.53457	-0.148077	0.443253	0.986021
ENSOCUT00000015013	ENSOCUG00000015009	OVCH2	ovochymase 2 (gene/pseudogene)	ProteinCodingRNA	1.42753	0	1.08665	0	0	1.60366	0.83806	0.534555	-0.303505	0.854814	0.991046
ENSOCUT00000001282	ENSOCUG00000009521	TCEAL8	transcription elongation factor A like 8	ProteinCodingRNA	9.17514	9.26138	9.37513	9.1858	9.40318	9.68077	9.27055	9.42325	0.152697	0.325413	0.986021
ENSOCUT00000001285	ENSOCUG00000001286	HSBP1	heat shock factor binding protein 1	ProteinCodingRNA	8.46144	8.625	8.84396	8.84279	8.54085	8.90135	8.64346	8.76167	0.118201	0.49564	0.986021
ENSOCUT00000001287	ENSOCUG00000001284	SEC24B	SEC24 homolog B, COPII coat complex component	ProteinCodingRNA	11.2598	11.4303	11.4339	11.2537	11.441	11.4484	11.3747	11.381	0.00636672	0.946019	0.999819
ENSOCUT00000001288	ENSOCUG00000001288	UBB	ubiquitin B	ProteinCodingRNA	12.3974	12.2579	11.9575	12.4355	11.4347	11.604	12.2042	11.8247	-0.379529	0.26685	0.970543
ENSOCUT00000001289	ENSOCUG00000001289	SEPT11	septin 11	ProteinCodingRNA	10.7842	10.6521	10.6591	10.8979	10.4613	10.6564	10.6985	10.6719	-0.0266284	0.906315	0.998991
ENSOCUT00000013028	ENSOCUG00000013023	---	---	ProteinCodingRNA	7.1763	7.04369	6.97432	7.67055	7.53294	7.55919	7.06477	7.58756	0.522793	0.00161497	0.122455
MSTRG.19126.1	---	---	---	Predicted_LncRNA	0	1.99947	1.69938	0	0	5.19712	1.23295	1.73237	0.499426	0.236463	0.95751
MSTRG.14335.10	---	---	---	Predicted_LncRNA	8.78255	8.7937	8.86844	8.84279	8.74181	8.49549	8.8149	8.69337	-0.121534	0.41671	0.986021
ENSOCUT00000019043	ENSOCUG00000019043	RF00100	---	OtherNonCodingRNA	0	0	0	1.57899	0	0	0	0.526329	0.526329	0.642233	0.986021
ENSOCUT00000023845	ENSOCUG00000022851	---	---	OtherNonCodingRNA	0	0.999643	0	0.99552	0	0	0.333214	0.33184	-0.00137449	0.992719	0.999819
ENSOCUT00000006526	ENSOCUG00000006526	MPO	myeloperoxidase	ProteinCodingRNA	0	1.99947	0	0	0	0	0.666488	0	-0.666488	0.543154	0.986021
ENSOCUT00000023018	ENSOCUG00000022248	RUFY4	RUN and FYVE domain containing 4	ProteinCodingRNA	5.04908	5.16923	5.6242	5.71912	5.71745	4.34851	5.28084	5.26169	-0.0191474	0.846668	0.989099
ENSOCUT00000019513	ENSOCUG00000019513	RF00288	small nucleolar RNA, C/D box 7	OtherNonCodingRNA	0	0.999643	0	0.99552	0	1.01405	0.333214	0.669856	0.336642	0.748747	0.986021
MSTRG.16314.1	---	---	---	Predicted_LncRNA	5.1209	5.69974	5.37354	5.77255	4.10379	5.38484	5.39806	5.08706	-0.311	0.727314	0.986021
ENSOCUT00000008100	ENSOCUG00000008100	FAM151A	family with sequence similarity 151 member A	ProteinCodingRNA	7.2819	6.62865	6.43311	6.48298	6.49288	6.70012	6.78122	6.55866	-0.222562	0.366507	0.986021
ENSOCUT00000008101	ENSOCUG00000008097	KRT72	keratin 72	ProteinCodingRNA	12.8477	12.8219	11.1391	13.9742	6.39217	6.47059	12.2696	8.94565	-3.32391	0.977881	0.999819
ENSOCUT00000008450	ENSOCUG00000008451	CCDC174	coiled-coil domain containing 174	ProteinCodingRNA	8.529	8.62134	8.58999	8.55329	8.81172	8.83847	8.58011	8.73449	0.154385	0.238479	0.959771
ENSOCUT00000008451	ENSOCUG00000008452	FSTL4	follistatin like 4	ProteinCodingRNA	4.35286	0	0	4.63524	0	0	1.45095	1.54508	0.0941291	0.922325	0.999819
ENSOCUT00000008104	ENSOCUG00000008102	MTSS1	MTSS1, I-BAR domain containing	ProteinCodingRNA	12.3657	12.585	12.7519	12.6941	12.4885	12.3692	12.5675	12.5173	-0.050254	0.733463	0.986021
ENSOCUT00000008106	ENSOCUG00000008113	UQCRB	ubiquinol-cytochrome c reductase binding protein	ProteinCodingRNA	8.67929	8.89713	8.81545	8.96259	9.0753	8.78612	8.79729	8.94134	0.144045	0.289309	0.979983
ENSOCUT00000008455	ENSOCUG00000008455	SSR2	signal sequence receptor subunit 2	ProteinCodingRNA	11.5962	11.6259	11.7002	11.5528	11.6715	11.8357	11.6408	11.6867	0.0459133	0.643553	0.986021
ENSOCUT00000019515	ENSOCUG00000019515	RF00091	---	OtherNonCodingRNA	3.47757	3.69978	2.1281	4.38377	3.60086	2.83136	3.10182	3.60533	0.503516	0.484652	0.986021
ENSOCUT00000008458	ENSOCUG00000008460	WDR87	WD repeat domain 87	ProteinCodingRNA	0	1.99947	2.1281	0	0	2.02102	1.37585	0.673674	-0.70218	0.654152	0.986021
ENSOCUT00000008459	ENSOCUG00000008454	CEP112	centrosomal protein 112	ProteinCodingRNA	7.84003	8.24246	8.26584	7.74596	8.83108	8.78945	8.11611	8.4555	0.339386	0.213071	0.942773
MSTRG.9199.1	---	---	---	Predicted_LncRNA	5.28621	5.95349	5.6242	4.99131	6.26504	5.67126	5.6213	5.64254	0.0212356	0.83411	0.987758
MSTRG.10150.1	---	---	---	Predicted_LncRNA	8.0057	7.80664	7.68322	8.07852	8.34372	8.19779	7.83185	8.20668	0.374822	0.025722	0.49446
ENSOCUT00000003822	ENSOCUG00000003822	FAM83B	family with sequence similarity 83 member B	ProteinCodingRNA	11.9061	12.3366	12.6786	12.2117	12.8343	12.6281	12.3071	12.558	0.250933	0.34329	0.986021
ENSOCUT00000003823	ENSOCUG00000003824	---	---	ProteinCodingRNA	6.96814	7.25668	7.7749	6.95688	7.78544	8.11001	7.33324	7.61745	0.284204	0.383358	0.986021
ENSOCUT00000007774	ENSOCUG00000007775	RWDD2B	RWD domain containing 2B	ProteinCodingRNA	6.62953	6.76748	6.69022	6.4174	6.54071	6.86061	6.69574	6.60624	-0.0895024	0.723387	0.986021
ENSOCUT00000003826	ENSOCUG00000003827	SLC8B1	solute carrier family 8 member B1	ProteinCodingRNA	8.04315	7.90618	7.91584	8.12548	8.19221	7.98785	7.95506	8.10185	0.14679	0.298027	0.983233
ENSOCUT00000013021	ENSOCUG00000013018	SMG6	SMG6, nonsense mediated mRNA decay factor	ProteinCodingRNA	11.4819	11.4422	11.4595	11.4934	11.2407	11.2604	11.4612	11.3315	-0.129726	0.231142	0.952743
ENSOCUT00000003824	ENSOCUG00000003823	SYTL3	synaptotagmin like 3	ProteinCodingRNA	3.68134	6.99929	7.52497	7.00232	8.86279	8.55145	6.06853	8.13885	2.07032	0.053192	0.652687
ENSOCUT00000003828	ENSOCUG00000003830	---	---	ProteinCodingRNA	8.8918	8.77408	8.74162	8.97973	8.94508	8.94079	8.8025	8.9552	0.152704	0.161702	0.898444
ENSOCUT00000001386	ENSOCUG00000001387	TDRKH	tudor and KH domain containing	ProteinCodingRNA	2.38533	4.24725	0	4.23943	0	3.34712	2.21086	2.52885	0.317987	0.868596	0.992697
ENSOCUT00000025897	ENSOCUG00000024220	RF00001	---	OtherNonCodingRNA	1.82162	1.99947	1.08665	2.57749	2.82223	2.34434	1.63591	2.58135	0.945441	0.223708	0.95106
ENSOCUT00000001465	ENSOCUG00000001464	UBA2	ubiquitin like modifier activating enzyme 2	ProteinCodingRNA	11.7006	11.6089	11.4652	11.7728	11.453	11.334	11.5916	11.5199	-0.0716453	0.683299	0.986021
ENSOCUT00000004106	ENSOCUG00000004102	ENTPD4	ectonucleoside triphosphate diphosphohydrolase 4	ProteinCodingRNA	11.1848	11.1137	11.227	11.1956	11.0425	11.1966	11.1752	11.1449	-0.0302672	0.742585	0.986021
ENSOCUT00000004107	ENSOCUG00000004107	ST3GAL2	ST3 beta-galactoside alpha-2,3-sialyltransferase 2	ProteinCodingRNA	10.1147	9.99788	9.82103	9.90542	9.77721	9.74903	9.97786	9.81055	-0.167304	0.160343	0.89695
ENSOCUT00000001460	ENSOCUG00000001460	RRNAD1	ribosomal RNA adenine dimethylase domain containing 1	ProteinCodingRNA	8.93727	8.69626	8.64367	8.94815	8.9802	8.83203	8.75907	8.92013	0.16106	0.260674	0.970468
ENSOCUT00000004101	ENSOCUG00000004104	MITD1	microtubule interacting and trafficking domain containing 1	ProteinCodingRNA	8.14571	8.34802	8.0069	8.45866	7.97147	8.01654	8.16687	8.14889	-0.0179874	0.96958	0.999819
ENSOCUT00000025890	ENSOCUG00000023794	---	---	OtherNonCodingRNA	1.42753	1.58449	0	0	2.59943	0	1.00401	0.866475	-0.13753	0.855751	0.991171
MSTRG.18354.1	---	---	---	Predicted_LncRNA	3.58305	4.08679	4.48235	3.57674	3.82346	0	4.05073	2.46673	-1.58399	0.32279	0.986021
ENSOCUT00000004108	ENSOCUG00000004111	---	---	ProteinCodingRNA	9.91069	9.78229	9.60695	9.94814	9.6862	9.80107	9.76664	9.8118	0.0451627	0.753698	0.986021
ENSOCUT00000001469	ENSOCUG00000001470	---	---	ProteinCodingRNA	5.31711	8.82901	6.524	8.98822	8.35714	1.01405	6.89004	6.1198	-0.770239	0.769022	0.986021
ENSOCUT00000025898	ENSOCUG00000027477	TIMM8A	translocase of inner mitochondrial membrane 8A	ProteinCodingRNA	6.34462	5.55389	5.68849	5.71912	6.14638	5.98171	5.86233	5.94907	0.0867346	0.888161	0.995584
ENSOCUT00000002418	ENSOCUG00000002420	MS4A3	membrane spanning 4-domains A3	ProteinCodingRNA	0	1.99947	0	0	0	0	0.666488	0	-0.666488	0.543154	0.986021
ENSOCUT00000009270	ENSOCUG00000009270	SYNPO	synaptopodin	ProteinCodingRNA	8.91976	9.72039	9.96587	8.81759	9.56806	10.0723	9.53534	9.486	-0.0493415	0.947254	0.999819
ENSOCUT00000009273	ENSOCUG00000009273	---	---	ProteinCodingRNA	9.63677	9.28931	9.16526	9.52437	9.29344	9.69504	9.36378	9.50428	0.140505	0.474552	0.986021
ENSOCUT00000009275	ENSOCUG00000009275	PPP1CC	protein phosphatase 1 catalytic subunit gamma	ProteinCodingRNA	11.8875	12.2838	12.5852	12.2434	12.8925	12.4623	12.2522	12.5327	0.280575	0.259669	0.970468
MSTRG.18070.1	---	---	---	Predicted_LncRNA	3.58305	0	4.24647	2.99215	3.18535	4.27443	2.60984	3.48398	0.874138	0.856169	0.991171
ENSOCUT00000009277	ENSOCUG00000009277	RND2	Rho family GTPase 2	ProteinCodingRNA	7.95256	7.75418	7.38649	8.5028	6.63187	7.1467	7.69774	7.42713	-0.270616	0.895584	0.997619
ENSOCUT00000009279	ENSOCUG00000009283	---	---	ProteinCodingRNA	5.59443	5.35686	5.83769	5.51478	5.33884	5.91014	5.59633	5.58792	-0.00840754	0.997216	0.999819
ENSOCUT00000002413	ENSOCUG00000002413	HOXD4	homeobox D4	ProteinCodingRNA	5.51668	6.53845	6.18831	5.03569	5.94779	6.0048	6.08115	5.66276	-0.418385	0.327224	0.986021
ENSOCUT00000034004	ENSOCUG00000002309	SNX11	sorting nexin 11	ProteinCodingRNA	7.10725	7.81947	6.99988	6.97978	7.73836	6.87321	7.30887	7.19712	-0.111752	0.768314	0.986021
ENSOCUT00000005954	ENSOCUG00000005957	RNF34	ring finger protein 34	ProteinCodingRNA	9.82727	9.28238	8.69934	9.59466	8.4849	8.3498	9.26966	8.80979	-0.459873	0.316719	0.986021
MSTRG.1382.1	---	---	---	Predicted_LncRNA	9.92078	9.44637	9.36041	9.67228	9.78716	9.5377	9.57585	9.66571	0.0898568	0.71373	0.986021
MSTRG.18647.1	---	---	---	Predicted_LncRNA	6.60469	6.32122	6.65847	6.62047	6.10455	6.13609	6.52813	6.28704	-0.241094	0.383861	0.986021
ENSOCUT00000020031	ENSOCUG00000020031	---	---	OtherNonCodingRNA	0	1.58449	0	0	2.01302	1.01405	0.528162	1.00902	0.480862	0.687537	0.986021
ENSOCUT00000019014	ENSOCUG00000019014	---	---	OtherNonCodingRNA	0	0	0	0	1.0087	0	0	0.336232	0.336232	0.80659	0.986021
ENSOCUT00000019540	ENSOCUG00000019540	RF00108	---	OtherNonCodingRNA	0	0.999643	1.69938	0	0	1.60366	0.899673	0.534555	-0.365118	0.805009	0.986021
ENSOCUT00000020036	ENSOCUG00000020036	---	---	OtherNonCodingRNA	2.13084	1.58449	1.69938	0.99552	1.0087	2.34434	1.8049	1.44952	-0.355381	0.778718	0.986021
MSTRG.10454.2	---	---	---	Predicted_LncRNA	10.3607	9.91964	10.8274	9.18333	8.81172	8.99945	10.3692	8.99817	-1.37108	3.44819e-08	1.69948e-05
ENSOCUT00000014273	ENSOCUG00000014277	ABHD4	abhydrolase domain containing 4	ProteinCodingRNA	10.7471	10.6779	10.7589	10.9062	10.2096	10.3943	10.728	10.5033	-0.224617	0.33629	0.986021
ENSOCUT00000020550	ENSOCUG00000020550	RF00100	---	OtherNonCodingRNA	2.13084	0.999643	1.08665	0	0	1.01405	1.40571	0.338016	-1.06769	0.239711	0.959884
ENSOCUT00000001687	ENSOCUG00000001686	BBX	BBX, HMG-box containing	ProteinCodingRNA	10.0192	10.3732	10.7238	10.2029	10.6485	10.4884	10.3721	10.4466	0.0745148	0.793318	0.986021
ENSOCUT00000014275	ENSOCUG00000014272	IL19	interleukin 19	ProteinCodingRNA	0	1.99947	3.14838	0	0	0	1.71595	0	-1.71595	0.120899	0.832364
ENSOCUT00000033983	ENSOCUG00000013076	---	---	ProteinCodingRNA	5.88996	5.78066	6.27461	5.94537	7.0172	6.29439	5.98174	6.41899	0.437244	0.181105	0.914954
ENSOCUT00000020559	ENSOCUG00000020559	---	---	OtherNonCodingRNA	0	0.999643	0	0	0	0	0.333214	0	-0.333214	0.820752	0.986021
ENSOCUT00000014279	ENSOCUG00000014279	KCND3	potassium voltage-gated channel subfamily D member 3 precursor	ProteinCodingRNA	6.41773	8.68228	9.74938	8.29939	9.13625	8.38543	8.28313	8.60702	0.323892	0.809189	0.986021
ENSOCUT00000014278	ENSOCUG00000014255	DUOX2	dual oxidase 2	ProteinCodingRNA	6.06403	5.61401	6.02363	5.57618	8.74522	8.15198	5.90056	7.49113	1.59057	0.00199623	0.13813
MSTRG.7591.1	---	---	---	Predicted_LncRNA	10.2134	10.1039	10.1355	10.1009	9.94065	10.0545	10.1509	10.032	-0.118937	0.202665	0.937932
MSTRG.18780.1	---	---	---	Predicted_LncRNA	0.883565	2.58437	0	0	5.14613	4.98127	1.15598	3.3758	2.21982	0.0401453	0.587704
ENSOCUT00000028713	ENSOCUG00000027509	CX3CR1	Oryctolagus cuniculus C-X3-C motif chemokine receptor 1 (CX3CR1), mRNA.	ProteinCodingRNA	5.18931	5.90619	5.11745	5.45066	4.40884	5.83482	5.40432	5.23144	-0.172876	0.828497	0.98615
ENSOCUT00000028712	ENSOCUG00000026464	---	---	OtherNonCodingRNA	5.28621	4.99931	5.06997	5.23919	5.94779	6.0499	5.1185	5.74563	0.627134	0.0580516	0.678177
ENSOCUT00000028711	ENSOCUG00000024003	---	---	OtherNonCodingRNA	1.42753	1.58449	1.08665	0	3.18535	2.83136	1.36622	2.00557	0.639346	0.270187	0.971256
ENSOCUT00000028710	ENSOCUG00000023236	TTLL4	tubulin tyrosine ligase like 4	ProteinCodingRNA	10.2073	9.89864	9.8721	10.0864	10.1048	10.0778	9.99267	10.0897	0.0969955	0.500074	0.986021
ENSOCUT00000028716	ENSOCUG00000026691	SLC31A2	solute carrier family 31 member 2	ProteinCodingRNA	10.158	10.1953	10.4174	10.4068	10.536	10.4073	10.2569	10.45	0.193151	0.0972775	0.790475
ENSOCUT00000015902	ENSOCUG00000015906	---	---	ProteinCodingRNA	1.42753	1.58449	0	2.31475	0	2.6083	1.00401	1.64102	0.637013	0.455012	0.986021
ENSOCUT00000018760	ENSOCUG00000018760	RF00100	---	OtherNonCodingRNA	3.36376	4.08679	4.06464	3.31385	3.33754	3.83334	3.8384	3.49491	-0.343487	0.493989	0.986021
ENSOCUT00000015901	ENSOCUG00000015967	VAMP4	vesicle associated membrane protein 4	ProteinCodingRNA	8.14571	8.03821	8.25527	8.00787	8.12056	8.10468	8.14639	8.0777	-0.0686915	0.610205	0.986021
ENSOCUT00000012301	ENSOCUG00000012306	CDKN2B	cyclin dependent kinase inhibitor 2B	ProteinCodingRNA	8.67034	9.03821	8.92624	8.96832	8.61721	8.79608	8.87826	8.79387	-0.084392	0.619187	0.986021
ENSOCUT00000012300	ENSOCUG00000012292	CASD1	CAS1 domain containing 1	ProteinCodingRNA	10.3882	10.3841	10.4007	10.4443	10.5132	9.99948	10.391	10.319	-0.0720097	0.737722	0.986021
ENSOCUT00000015904	ENSOCUG00000015909	HBEGF	heparin binding EGF like growth factor	ProteinCodingRNA	8.20887	8.92707	9.47648	8.90692	8.93019	8.90135	8.8708	8.91282	0.0420178	0.882862	0.994327
ENSOCUT00000018942	ENSOCUG00000018942	RF00001	---	OtherNonCodingRNA	2.95595	3.32129	2.45817	2.57749	1.59655	2.83136	2.9118	2.33513	-0.576674	0.435423	0.986021
ENSOCUT00000018769	ENSOCUG00000018769	RF00012	---	OtherNonCodingRNA	7.45861	7.80664	8.34775	7.45051	8.63935	8.16742	7.871	8.08576	0.214755	0.505653	0.986021
ENSOCUT00000015909	ENSOCUG00000015904	TKT	transketolase	ProteinCodingRNA	12.0108	12.1176	12.1719	11.9409	12.0794	12.3246	12.1001	12.1149	0.0148579	0.868693	0.992697
ENSOCUT00000012309	ENSOCUG00000012312	CLEC4D	C-type lectin domain family 4 member D	ProteinCodingRNA	4.29193	5.61401	5.94685	4.16145	7.40955	6.70012	5.28427	6.09037	0.806109	0.134381	0.865137
ENSOCUT00000032660	ENSOCUG00000028665	RF00001	---	OtherNonCodingRNA	2.6016	0.999643	1.69938	2.31475	2.33582	2.02102	1.76687	2.22386	0.456993	0.712487	0.986021
MSTRG.11536.1	---	---	---	Predicted_LncRNA	9.32521	9.12599	9.18767	9.20779	9.1206	9.02226	9.21296	9.11688	-0.0960755	0.410247	0.986021
ENSOCUT00000032662	ENSOCUG00000028667	---	---	OtherNonCodingRNA	0	0	1.08665	0.99552	0	0	0.362216	0.33184	-0.0303763	0.992719	0.999819
ENSOCUT00000010982	ENSOCUG00000010984	---	---	ProteinCodingRNA	7.28971	8.6575	9.22879	8.28568	8.29805	8.07225	8.392	8.21866	-0.173339	0.404785	0.986021
ENSOCUT00000032664	ENSOCUG00000028669	RF00001	---	OtherNonCodingRNA	2.6016	2.58437	1.69938	2.57749	2.82223	2.02102	2.29511	2.47358	0.178467	0.837248	0.98785
ENSOCUT00000032665	ENSOCUG00000028670	RF00026	---	OtherNonCodingRNA	0	0.999643	1.69938	1.99327	1.59655	1.60366	0.899673	1.73116	0.831489	0.41955	0.986021
ENSOCUT00000032666	ENSOCUG00000028671	RF00406	---	OtherNonCodingRNA	3.10507	2.99938	3.32054	2.99215	4.01626	4.02623	3.14166	3.67821	0.536552	0.27801	0.979983
ENSOCUT00000007863	ENSOCUG00000007864	EIF4E1B	eukaryotic translation initiation factor 4E family member 1B	ProteinCodingRNA	0	0	0	0	1.59655	0	0	0.532182	0.532182	0.638012	0.986021
ENSOCUT00000026816	ENSOCUG00000024895	---	---	ProteinCodingRNA	13.3667	13.271	13.237	13.1366	13.4125	13.4775	13.2916	13.3422	0.0506356	0.659861	0.986021
ENSOCUT00000020623	ENSOCUG00000020623	RF00004	---	OtherNonCodingRNA	1.42753	0	1.08665	0.99552	1.0087	1.60366	0.83806	1.20263	0.364567	0.768369	0.986021
ENSOCUT00000026814	ENSOCUG00000024251	---	---	ProteinCodingRNA	7.37296	6.32122	5.6567	5.79854	6.22656	5.91014	6.4503	5.97841	-0.471884	0.181501	0.914954
ENSOCUT00000026815	ENSOCUG00000021010	TUBB6	tubulin beta 6 class V	ProteinCodingRNA	13.0779	12.976	12.7453	13.2905	12.7271	12.7574	12.9331	12.925	-0.00808751	0.963189	0.999819
ENSOCUT00000026812	ENSOCUG00000013789	C1orf112	chromosome 1 open reading frame 112	ProteinCodingRNA	8.69113	8.04368	8.11611	8.47889	7.42663	7.47902	8.28364	7.79485	-0.488798	0.229693	0.952191
ENSOCUT00000026813	ENSOCUG00000002043	AIMP1	aminoacyl tRNA synthetase complex interacting multifunctional protein 1	ProteinCodingRNA	10.7556	10.474	10.3789	10.5504	10.4675	10.4843	10.5362	10.5007	-0.0354466	0.735545	0.986021
ENSOCUT00000026811	ENSOCUG00000025965	---	---	ProteinCodingRNA	2.13084	0	0	0	0	0	0.710279	0	-0.710279	0.510786	0.986021
ENSOCUT00000011575	ENSOCUG00000011572	---	---	ProteinCodingRNA	0	1.99947	0	0	0	1.60366	0.666488	0.534555	-0.131934	0.87485	0.993072
ENSOCUT00000030405	ENSOCUG00000027120	---	---	ProteinCodingRNA	8.08416	7.91815	7.91584	7.77897	8.07256	7.93474	7.97272	7.92875	-0.0439619	0.781507	0.986021
ENSOCUT00000011572	ENSOCUG00000011571	RUSC2	RUN and SH3 domain containing 2	ProteinCodingRNA	11.5744	11.7579	11.8579	11.5399	11.7726	12.0142	11.7301	11.7755	0.0454859	0.739933	0.986021
ENSOCUT00000030400	ENSOCUG00000027239	---	---	ProteinCodingRNA	5.15551	4.45875	4.32946	4.84932	2.59943	4.02623	4.64791	3.82499	-0.822914	0.346786	0.986021
ENSOCUT00000011570	ENSOCUG00000011568	---	---	ProteinCodingRNA	6.59211	5.69974	5.6567	6.43407	4.66051	4.72734	5.98285	5.27397	-0.708881	0.378201	0.986021
ENSOCUT00000005957	ENSOCUG00000005956	ALDH18A1	aldehyde dehydrogenase 18 family member A1	ProteinCodingRNA	7.37296	6.45873	6.9218	6.9911	1.0087	7.11522	6.91783	5.03834	-1.87949	0.64567	0.986021
MSTRG.5686.2	---	---	---	Predicted_LncRNA	0	7.66463	7.24402	0	4.60158	6.78259	4.96955	3.79473	-1.17482	0.612226	0.986021
ENSOCUT00000030408	ENSOCUG00000022146	---	---	OtherNonCodingRNA	4.41131	2.58437	2.72661	1.99327	4.87473	4.67071	3.24076	3.84624	0.605472	0.386813	0.986021
ENSOCUT00000011578	ENSOCUG00000011573	SGK3	serum/glucocorticoid regulated kinase family member 3	ProteinCodingRNA	11.5383	11.2002	10.6277	11.8326	9.94065	10.1034	11.1221	10.6256	-0.496524	0.592402	0.986021
MSTRG.5686.3	---	---	---	Predicted_LncRNA	0	0	0	0	8.38361	0	0	2.79454	2.79454	7.80854e-09	5.13137e-06
ENSOCUT00000020142	ENSOCUG00000020142	---	---	OtherNonCodingRNA	1.42753	1.58449	1.08665	0	0	1.01405	1.36622	0.338016	-1.02821	0.276513	0.979483
ENSOCUT00000000384	ENSOCUG00000000386	RCAN3	RCAN family member 3	ProteinCodingRNA	8.73471	8.55004	8.11026	8.69149	7.64661	7.01643	8.465	7.78484	-0.680158	0.216726	0.94854
ENSOCUT00000020140	ENSOCUG00000020140	---	---	OtherNonCodingRNA	3.94146	4.52288	5.11745	4.16145	4.26436	3.19481	4.52726	3.87354	-0.653724	0.227109	0.951724
ENSOCUT00000031311	ENSOCUG00000024314	CDC42SE1	CDC42 small effector 1	ProteinCodingRNA	8.9668	8.71697	8.62326	9.14079	8.52112	8.22262	8.76901	8.62818	-0.140833	0.721749	0.986021
ENSOCUT00000031315	ENSOCUG00000022239	---	---	ProteinCodingRNA	1.42753	2.32136	3.6133	2.79967	3.4752	2.6083	2.45406	2.96106	0.506996	0.696971	0.986021
ENSOCUT00000031314	ENSOCUG00000022986	---	---	ProteinCodingRNA	4.89373	3.90623	4.68502	3.99159	4.40884	5.07152	4.49499	4.49065	-0.00434543	0.996252	0.999819
ENSOCUT00000031317	ENSOCUG00000021453	---	---	ProteinCodingRNA	0	0	3.14838	0	0	0	1.04946	0	-1.04946	0.333051	0.986021
ENSOCUT00000031316	ENSOCUG00000001584	---	---	OtherNonCodingRNA	2.95595	1.99947	1.69938	3.45128	4.54015	3.83334	2.21826	3.94159	1.72332	0.0124102	0.35878
MSTRG.8876.1	---	---	---	Predicted_LncRNA	4.29193	4.99931	6.6095	4.16145	2.33582	3.48487	5.30025	3.32738	-1.97287	0.00565875	0.248523
ENSOCUT00000032932	ENSOCUG00000028937	RF00015	---	OtherNonCodingRNA	3.10507	2.32136	3.14838	3.31385	2.01302	2.83136	2.85827	2.71941	-0.138858	0.893398	0.996829
MSTRG.9848.1	---	---	---	Predicted_LncRNA	8.0057	7.734	8.09255	7.73926	8.09409	7.9994	7.94408	7.94425	0.000167354	0.999169	0.999819
ENSOCUT00000032935	ENSOCUG00000028940	RF00009	---	OtherNonCodingRNA	1.42753	1.58449	2.45817	1.99327	2.59943	2.6083	1.8234	2.40033	0.576938	0.461247	0.986021
ENSOCUT00000032936	ENSOCUG00000028941	RF00582	---	OtherNonCodingRNA	1.42753	3.32129	3.47433	2.57749	4.26436	4.02623	2.74105	3.62269	0.881643	0.298093	0.983233
ENSOCUT00000032937	ENSOCUG00000028942	RF00015	---	OtherNonCodingRNA	1.42753	1.99947	1.69938	2.31475	3.18535	2.34434	1.70879	2.61481	0.906024	0.199011	0.934143
ENSOCUT00000010192	ENSOCUG00000010195	ZC2HC1C	zinc finger C2HC-type containing 1C	ProteinCodingRNA	5.6682	6.06539	5.68849	6.60583	6.12561	6.15685	5.80736	6.2961	0.488739	0.0797354	0.743806
ENSOCUT00000010193	ENSOCUG00000010194	GPRC6A	G protein-coupled receptor class C group 6 member A	ProteinCodingRNA	0	1.99947	0	0	0	0	0.666488	0	-0.666488	0.543154	0.986021
ENSOCUT00000010190	ENSOCUG00000010187	CA9	carbonic anhydrase 9	ProteinCodingRNA	6.68981	6.52286	6.73657	6.93361	4.33841	6.23704	6.64974	5.83635	-0.813391	0.42536	0.986021
ENSOCUT00000010191	ENSOCUG00000010193	MRPL35	mitochondrial ribosomal protein L35	ProteinCodingRNA	8.52569	8.17422	8.30225	8.5647	8.27467	8.3942	8.33405	8.41119	0.0771374	0.660854	0.986021
ENSOCUT00000010197	ENSOCUG00000010196	REEP1	receptor accessory protein 1	ProteinCodingRNA	5.59443	5.55389	6.48833	5.12057	6.08317	5.41962	5.87888	5.54112	-0.337763	0.427238	0.986021
ENSOCUT00000010194	ENSOCUG00000010192	CDH5	cadherin 5	ProteinCodingRNA	9.8353	10.2731	10.449	9.23659	10.3538	10.6269	10.1858	10.0725	-0.113352	0.949716	0.999819
ENSOCUT00000010195	ENSOCUG00000010197	PHAX	phosphorylated adaptor for RNA export	ProteinCodingRNA	9.14531	9.20386	9.41368	9.26484	9.3527	9.41378	9.25428	9.34377	0.0894904	0.4797	0.986021
ENSOCUT00000017484	ENSOCUG00000017485	TAAR1	trace amine associated receptor 1	ProteinCodingRNA	0	0	2.1281	0	0	0	0.709366	0	-0.709366	0.516882	0.986021
ENSOCUT00000033557	ENSOCUG00000029583	---	---	ProteinCodingRNA	5.22234	2.99938	2.1281	4.74625	3.01518	2.83136	3.44994	3.53093	0.0809914	0.796625	0.986021
ENSOCUT00000005509	ENSOCUG00000005509	LMX1A	LIM homeobox transcription factor 1 alpha	ProteinCodingRNA	6.75897	6.06539	5.92033	5.87382	5.60194	5.31265	6.24823	5.59614	-0.652088	0.0518439	0.646749
ENSOCUT00000021107	ENSOCUG00000028121	---	---	ProteinCodingRNA	5.40604	4.95351	5.25117	5.94537	4.54015	3.83334	5.20357	4.77295	-0.43062	0.777274	0.986021
ENSOCUT00000005501	ENSOCUG00000005498	AGPAT1	1-acylglycerol-3-phosphate O-acyltransferase 1	ProteinCodingRNA	8.54214	8.62865	8.71099	8.73924	8.65029	8.61285	8.62726	8.66746	0.0402029	0.724349	0.986021
ENSOCUT00000005500	ENSOCUG00000005499	YIPF3	Yip1 domain family member 3	ProteinCodingRNA	11.3578	11.6112	11.8031	11.5003	11.6535	11.7469	11.5907	11.6336	0.0428394	0.817152	0.986021
ENSOCUT00000005507	ENSOCUG00000005508	CCDC6	coiled-coil domain containing 6	ProteinCodingRNA	10.6359	10.9017	10.8318	10.7658	10.7655	10.7795	10.7898	10.7703	-0.0195129	0.823974	0.986021
ENSOCUT00000005506	ENSOCUG00000005507	GNA14	G protein subunit alpha 14	ProteinCodingRNA	5.69197	5.93004	4.8627	7.29486	5.47638	5.86037	5.4949	6.21054	0.715633	0.128615	0.852451
ENSOCUT00000005505	ENSOCUG00000005504	POLR1C	RNA polymerase I subunit C	ProteinCodingRNA	8.86067	8.90918	8.75294	8.90094	8.98597	8.84488	8.84093	8.9106	0.0696687	0.54428	0.986021
ENSOCUT00000005504	ENSOCUG00000005503	SPDL1	spindle apparatus coiled-coil protein 1	ProteinCodingRNA	7.43767	7.20875	6.6095	7.45868	6.18702	6.02753	7.08531	6.55775	-0.527561	0.368062	0.986021
MSTRG.16958.1	---	---	---	Predicted_LncRNA	9.80291	8.05457	5.94685	8.08382	4.40884	4.27443	7.93478	5.58903	-2.34575	0.168512	0.908798
ENSOCUT00000015658	ENSOCUG00000015652	RECK	reversion inducing cysteine rich protein with kazal motifs	ProteinCodingRNA	10.7521	10.8463	11.1434	10.4849	10.5555	10.9296	10.914	10.6567	-0.257301	0.160988	0.89698
ENSOCUT00000015659	ENSOCUG00000015660	TRIM31	tripartite motif containing 31	ProteinCodingRNA	2.95595	3.32129	3.14838	2.79967	4.18631	4.41896	3.14187	3.80164	0.659771	0.188045	0.922687
ENSOCUT00000015652	ENSOCUG00000015651	---	---	ProteinCodingRNA	8.55516	8.32122	8.11611	8.65283	8.38797	7.78272	8.33083	8.27451	-0.0563212	0.927418	0.999819
ENSOCUT00000015653	ENSOCUG00000015658	---	---	ProteinCodingRNA	3.24021	3.45878	3.14838	3.69216	4.01626	5.07152	3.28246	4.25998	0.977522	0.0562931	0.6702
ENSOCUT00000015650	ENSOCUG00000015653	---	---	ProteinCodingRNA	9.6805	9.55579	8.66779	10.0798	8.94804	8.77944	9.30136	9.2691	-0.0322612	0.951374	0.999819
ENSOCUT00000015651	ENSOCUG00000015650	TBC1D15	TBC1 domain family member 15	ProteinCodingRNA	9.28082	9.51892	9.45815	9.32866	9.47059	9.53572	9.4193	9.44499	0.0256888	0.835137	0.987758
ENSOCUT00000015655	ENSOCUG00000015655	---	---	ProteinCodingRNA	9.28082	8.96507	9.03533	9.08644	9.30733	8.96749	9.09374	9.12042	0.0266779	0.870781	0.993003
ENSOCUT00000005919	ENSOCUG00000005919	CABCOCO1	ciliary associated calcium binding coiled-coil 1	ProteinCodingRNA	3.77336	2.99938	2.72661	3.79902	2.82223	0	3.16645	2.20708	-0.959364	0.712597	0.986021
MSTRG.15821.1	---	---	---	Predicted_LncRNA	9.14316	8.98228	9.48781	8.97118	8.56032	8.84168	9.20442	8.79106	-0.413354	0.0347484	0.559474
ENSOCUT00000017504	ENSOCUG00000017506	TMSB10	thymosin beta 10	ProteinCodingRNA	8.61545	8.86038	9.16808	8.54947	9.24372	9.35659	8.8813	9.04993	0.168627	0.471262	0.986021
ENSOCUT00000010225	ENSOCUG00000010223	RIOX2	ribosomal oxygenase 2	ProteinCodingRNA	10.1103	9.91815	9.91975	10.1932	9.86751	9.86082	9.98272	9.97383	-0.00888724	0.979391	0.999819
ENSOCUT00000017506	ENSOCUG00000017458	NEB	nebulin	ProteinCodingRNA	6.47367	8.48713	7.38649	6.51469	6.71761	6.8857	7.44909	6.706	-0.743094	0.053338	0.653509
ENSOCUT00000010227	ENSOCUG00000010203	TLN1	talin 1	ProteinCodingRNA	14.0278	14.0053	14.1849	13.8766	14.2607	14.248	14.0727	14.1284	0.055727	0.675367	0.986021
ENSOCUT00000017501	ENSOCUG00000017503	TOE1	target of EGR1, exonuclease	ProteinCodingRNA	8.08416	7.88193	8.39186	7.99106	8.46023	8.48732	8.11932	8.31287	0.193555	0.383107	0.986021
ENSOCUT00000017502	ENSOCUG00000017504	SYT9	synaptotagmin 9	ProteinCodingRNA	6.91862	6.44224	5.41213	6.64933	5.97126	5.41962	6.25766	6.0134	-0.244261	0.567298	0.986021
ENSOCUT00000010223	ENSOCUG00000010216	ABCC6	ATP binding cassette subfamily C member 6	ProteinCodingRNA	5.98925	5.83219	6.88112	5.69164	7.15677	7.47075	6.23418	6.77305	0.538867	0.221252	0.949977
ENSOCUT00000007347	ENSOCUG00000007350	TIMM9	translocase of inner mitochondrial membrane 9	ProteinCodingRNA	6.4034	6.02167	5.55692	5.57618	6.71761	6.93462	5.99399	6.40947	0.415476	0.276685	0.979486
ENSOCUT00000010228	ENSOCUG00000010227	SLC26A5	prestin	ProteinCodingRNA	0.883565	1.99947	2.1281	1.57899	3.18535	3.72627	1.67038	2.8302	1.15983	0.121494	0.832619
ENSOCUT00000017509	ENSOCUG00000017509	SERPINI1	serpin family I member 1	ProteinCodingRNA	7.96725	7.31217	7.18953	7.45868	6.85008	6.93462	7.48965	7.08113	-0.408524	0.171095	0.909947
ENSOCUT00000000900	ENSOCUG00000000898	GPHN	gephyrin	ProteinCodingRNA	10.9822	10.8588	10.8877	10.5456	10.9773	10.8207	10.9096	10.7812	-0.128344	0.402487	0.986021
MSTRG.7475.3	---	---	---	Predicted_LncRNA	10.6412	10.8058	10.7457	10.3737	11.3765	11.2562	10.7309	11.0021	0.271199	0.211126	0.940973
ENSOCUT00000000902	ENSOCUG00000000903	HDX	highly divergent homeobox	ProteinCodingRNA	5.31711	4.7542	5.20796	5.07875	5.71745	5.38484	5.09309	5.39368	0.30059	0.388658	0.986021
ENSOCUT00000007219	ENSOCUG00000007221	ERP29	endoplasmic reticulum protein 29	ProteinCodingRNA	10.4054	10.3776	10.3886	10.4658	10.1479	10.2054	10.3905	10.273	-0.117545	0.356941	0.986021
ENSOCUT00000013430	ENSOCUG00000013424	---	---	ProteinCodingRNA	0.883565	2.32136	2.72661	2.31475	0	0	1.97718	0.771584	-1.20559	0.435956	0.986021
ENSOCUT00000000905	ENSOCUG00000000905	NPAS4	neuronal PAS domain protein 4	ProteinCodingRNA	0	0	2.1281	0	5.33884	4.93393	0.709366	3.42426	2.71489	0.0241715	0.475593
ENSOCUT00000013432	ENSOCUG00000013429	NHSL1	NHS like 1	ProteinCodingRNA	11.5627	11.6112	11.6201	11.7972	11.7508	11.4453	11.598	11.6644	0.0664052	0.552317	0.986021
MSTRG.15031.1	---	---	---	Predicted_LncRNA	7.71217	7.60662	8.03189	7.49092	8.03408	8.28997	7.78356	7.93832	0.154764	0.494108	0.986021
ENSOCUT00000000909	ENSOCUG00000000909	HACE1	HECT domain and ankyrin repeat containing E3 ubiquitin protein ligase 1	ProteinCodingRNA	9.79881	9.5051	9.43257	9.48289	9.68088	9.35659	9.57883	9.50679	-0.0720403	0.637564	0.986021
ENSOCUT00000013438	ENSOCUG00000013444	---	---	OtherNonCodingRNA	10.4816	10.6011	10.757	10.2461	11.4118	11.0045	10.6132	10.8875	0.274247	0.232697	0.953868
ENSOCUT00000007320	ENSOCUG00000007321	YAF2	YY1 associated factor 2	ProteinCodingRNA	8.58085	8.70665	8.70323	8.38766	8.61348	8.304	8.66358	8.43505	-0.228532	0.115997	0.824207
ENSOCUT00000013552	ENSOCUG00000028015	---	---	ProteinCodingRNA	13.3441	13.2832	13.1282	13.2393	13.1687	13.3076	13.2518	13.2385	-0.0133513	0.880751	0.993824
ENSOCUT00000001107	ENSOCUG00000001108	---	---	ProteinCodingRNA	9.89156	9.99788	10.1078	9.99526	10.0369	9.91363	9.99908	9.98193	-0.0171493	0.864742	0.992119
ENSOCUT00000013550	ENSOCUG00000013555	---	---	ProteinCodingRNA	1.42753	3.99933	3.32054	1.99327	3.33754	2.02102	2.9158	2.45061	-0.465188	0.460228	0.986021
ENSOCUT00000013556	ENSOCUG00000013559	SLAMF7	SLAM family member 7	ProteinCodingRNA	4.09201	4.08679	4.97005	4.99131	6.42653	4.98127	4.38295	5.46637	1.08341	0.0353154	0.561616
ENSOCUT00000024227	ENSOCUG00000002765	LUC7L3	LUC7 like 3 pre-mRNA splicing factor	ProteinCodingRNA	10.6841	10.7757	10.8971	10.7325	10.7503	10.5544	10.7856	10.6791	-0.106525	0.336533	0.986021
ENSOCUT00000005716	ENSOCUG00000005719	MARCH5	membrane associated ring-CH-type finger 5	ProteinCodingRNA	10.2728	9.99929	9.97717	10.198	9.72468	9.86714	10.0831	9.92995	-0.153127	0.402769	0.986021
ENSOCUT00000013559	ENSOCUG00000013553	CCDC158	coiled-coil domain containing 158	ProteinCodingRNA	5.86926	5.20876	4.80587	5.31318	4.10379	2.34434	5.29463	3.92044	-1.37419	0.179009	0.914954
ENSOCUT00000001026	ENSOCUG00000001026	PPM1F	protein phosphatase, Mg2+/Mn2+ dependent 1F	ProteinCodingRNA	9.91448	9.7238	10.1725	9.76253	10.0117	10.0195	9.93691	9.93122	-0.00569211	0.940925	0.999819
MSTRG.6890.1	---	---	---	Predicted_LncRNA	5.76103	5.35686	6.50627	5.82407	7.49298	7.17751	5.87472	6.83152	0.9568	0.0439191	0.613287
ENSOCUT00000013068	ENSOCUG00000013067	---	---	ProteinCodingRNA	8.88923	9.287	9.33553	9.20049	9.32109	9.18273	9.17059	9.23477	0.0641865	0.740405	0.986021
ENSOCUT00000006986	ENSOCUG00000006988	RBSN	rabenosyn, RAB effector	ProteinCodingRNA	10.1771	10.2245	10.1004	10.3275	10.1569	9.98068	10.1673	10.155	-0.0122996	0.959728	0.999819
ENSOCUT00000016109	ENSOCUG00000016111	ANKEF1	ankyrin repeat and EF-hand domain containing 1	ProteinCodingRNA	6.44597	5.64316	5.80906	6.59103	3.33754	4.83433	5.96606	4.92097	-1.0451	0.497153	0.986021
ENSOCUT00000016108	ENSOCUG00000016105	COLQ	collagen like tail subunit of asymmetric acetylcholinesterase	ProteinCodingRNA	5.46242	5.12859	4.91738	4.23943	4.40884	5.27516	5.16946	4.64114	-0.528322	0.266828	0.970543
ENSOCUT00000006987	ENSOCUG00000006990	PHF23	PHD finger protein 23	ProteinCodingRNA	2.38533	3.99933	4.24647	4.07902	2.33582	2.34434	3.54371	2.91973	-0.623986	0.488451	0.986021
ENSOCUT00000016102	ENSOCUG00000016107	EFNA5	ephrin A5	ProteinCodingRNA	9.38659	0.999643	8.35272	1.99327	7.0616	7.52766	6.24632	5.52751	-0.718807	0.396476	0.986021
ENSOCUT00000016100	ENSOCUG00000016095	---	---	ProteinCodingRNA	10.725	10.4781	10.4162	10.5974	10.2853	10.416	10.5397	10.4329	-0.106848	0.452497	0.986021
ENSOCUT00000016106	ENSOCUG00000016093	ABLIM3	actin binding LIM protein family member 3	ProteinCodingRNA	10.4009	10.3122	10.2807	10.5399	9.8846	9.68077	10.3313	10.0351	-0.296183	0.301534	0.983233
ENSOCUT00000016105	ENSOCUG00000013846	---	---	ProteinCodingRNA	1.42753	0	0	0	0	0	0.475843	0	-0.475843	0.68719	0.986021
ENSOCUT00000029399	ENSOCUG00000026404	RF00026	---	OtherNonCodingRNA	0	0	0	0	1.0087	0	0	0.336232	0.336232	0.80659	0.986021
ENSOCUT00000013987	ENSOCUG00000013991	AKAP7	A-kinase anchoring protein 7	ProteinCodingRNA	6.84631	7.06538	7.04968	6.84908	6.78537	7.17751	6.98712	6.93732	-0.0498032	0.845994	0.989085
ENSOCUT00000019507	ENSOCUG00000019507	RF00016	small nucleolar RNA, C/D box 14D	OtherNonCodingRNA	3.10507	3.80669	2.72661	4.16145	4.66051	4.67071	3.21279	4.49756	1.28476	0.0146484	0.38792
ENSOCUT00000002442	ENSOCUG00000002440	SLC16A4	solute carrier family 16 member 4	ProteinCodingRNA	6.54067	6.80665	6.43311	6.38345	6.86268	6.6859	6.59347	6.64401	0.0505356	0.822892	0.986021
MSTRG.4918.1	---	---	---	Predicted_LncRNA	7.15935	7.10782	7.51614	6.64933	7.34815	7.2176	7.2611	7.07169	-0.18941	0.525396	0.986021
ENSOCUT00000029391	ENSOCUG00000022570	---	---	OtherNonCodingRNA	8.04315	7.52285	7.92921	7.93358	7.66831	7.47902	7.83174	7.69363	-0.138104	0.525078	0.986021
ENSOCUT00000029394	ENSOCUG00000001129	SLC26A3	chloride anion exchanger	ProteinCodingRNA	0	1.58449	0	0	1.59655	0	0.528162	0.532182	0.00401935	0.995693	0.999819
ENSOCUT00000029395	ENSOCUG00000021848	---	---	ProteinCodingRNA	11.5911	11.4592	11.3875	11.6679	11.1891	11.1108	11.4793	11.3226	-0.156668	0.44981	0.986021
MSTRG.10583.1	---	---	---	Predicted_LncRNA	8.09311	8.26138	8.33274	8.3442	7.84381	8.25187	8.22908	8.14663	-0.0824507	0.719807	0.986021
ENSOCUT00000029397	ENSOCUG00000028076	---	---	ProteinCodingRNA	11.7654	11.7357	11.7589	11.8279	11.7617	11.7824	11.7533	11.7907	0.0373445	0.532751	0.986021
ENSOCUT00000021545	ENSOCUG00000024291	---	---	ProteinCodingRNA	3.94146	3.99933	3.6133	4.23943	4.01626	4.02623	3.85136	4.09397	0.242609	0.59514	0.986021
ENSOCUT00000024715	ENSOCUG00000027382	---	---	ProteinCodingRNA	5.01178	4.58428	4.80587	5.48308	4.60158	4.72734	4.80064	4.93733	0.136689	0.65987	0.986021
ENSOCUT00000024714	ENSOCUG00000021575	SAYSD1	SAYSVFN motif domain containing 1	ProteinCodingRNA	5.15551	5.12859	5.75003	5.79854	5.71745	5.58196	5.34471	5.69932	0.354605	0.280683	0.979983
ENSOCUT00000021540	ENSOCUG00000022043	---	---	ProteinCodingRNA	10.3699	10.4171	10.3716	10.198	10.5082	10.4884	10.3862	10.3982	0.0119817	0.878131	0.993824
ENSOCUT00000021543	ENSOCUG00000007427	FAT3	FAT atypical cadherin 3	ProteinCodingRNA	11.3358	11.2584	11.6667	11.093	9.30271	8.61285	11.4203	9.66952	-1.7508	0.0134816	0.371188
ENSOCUT00000021542	ENSOCUG00000025153	---	---	ProteinCodingRNA	0	2.58437	0	0	0	0	0.861456	0	-0.861456	0.423918	0.986021
ENSOCUT00000006087	ENSOCUG00000006091	OSR1	odd-skipped related transciption factor 1	ProteinCodingRNA	8.73184	9.53456	9.20974	8.56091	7.92416	8.16742	9.15872	8.21749	-0.941224	0.000520934	0.0596286
ENSOCUT00000006086	ENSOCUG00000006082	DDX11	DEAD/H-box helicase 11	ProteinCodingRNA	9.00526	9.0894	9.02603	9.54754	9.16451	8.64628	9.04023	9.11945	0.0792148	0.608344	0.986021
ENSOCUT00000006085	ENSOCUG00000006086	LCLAT1	lysocardiolipin acyltransferase 1	ProteinCodingRNA	10.5852	10.3612	10.1934	10.4607	10.3222	10.3722	10.3799	10.3851	0.00512308	0.978315	0.999819
ENSOCUT00000006981	ENSOCUG00000006984	MRPS25	mitochondrial ribosomal protein S25	ProteinCodingRNA	9.1688	9.22088	9.35794	9.48689	9.37487	9.23493	9.24921	9.36556	0.116357	0.336514	0.986021
ENSOCUT00000006083	ENSOCUG00000006079	BAZ2A	bromodomain adjacent to zinc finger domain 2A	ProteinCodingRNA	12.5534	12.5216	12.3999	12.651	12.3407	12.248	12.4916	12.4132	-0.0783849	0.625456	0.986021
ENSOCUT00000033225	ENSOCUG00000016923	PCDH1	protocadherin 1	ProteinCodingRNA	11.5355	10.9367	10.919	10.3005	11.0053	10.8616	11.1304	10.7225	-0.407895	0.114437	0.820757
ENSOCUT00000006080	ENSOCUG00000006081	OR9Q2	olfactory receptor family 9 subfamily Q member 2	ProteinCodingRNA	1.82162	0	1.08665	0	2.01302	2.02102	0.969424	1.34468	0.375258	0.697803	0.986021
ENSOCUT00000013885	ENSOCUG00000013884	STRAP	serine/threonine kinase receptor associated protein	ProteinCodingRNA	11.4303	11.1817	11.0185	11.3375	10.9205	10.9446	11.2102	11.0675	-0.142628	0.435404	0.986021
ENSOCUT00000033327	ENSOCUG00000010200	PMPCB	peptidase, mitochondrial processing beta subunit	ProteinCodingRNA	9.15604	9.17421	9.24758	9.42149	8.84067	8.64994	9.19261	8.9707	-0.221909	0.422129	0.986021
ENSOCUT00000033324	ENSOCUG00000006644	AAGAB	alpha and gamma adaptin binding protein	ProteinCodingRNA	8.289	8.07611	8.25527	8.01897	8.48081	8.28054	8.20679	8.26011	0.0533163	0.727993	0.986021
ENSOCUT00000006884	ENSOCUG00000006880	PPP4R3B	protein phosphatase 4 regulatory subunit 3B	ProteinCodingRNA	11.3508	11.262	11.297	11.3359	11.231	11.1417	11.3033	11.2362	-0.0670512	0.462923	0.986021
ENSOCUT00000026358	ENSOCUG00000021325	---	---	ProteinCodingRNA	7.99618	7.98228	8.22849	8.16098	8.18219	8.37217	8.06898	8.23845	0.169463	0.263171	0.970468
ENSOCUT00000006882	ENSOCUG00000006885	SLC30A2	solute carrier family 30 member 2	ProteinCodingRNA	0	1.58449	0	0	0	0	0.528162	0	-0.528162	0.648025	0.986021
ENSOCUT00000033320	ENSOCUG00000021297	TRIM29	tripartite motif containing 29	ProteinCodingRNA	14.0716	14.1175	14.2335	14.2772	14.2603	14.0158	14.1409	14.1845	0.0435835	0.701547	0.986021
ENSOCUT00000033321	ENSOCUG00000021232	NTSR2	neurotensin receptor 2	ProteinCodingRNA	0	4.9062	3.96434	1.99327	0	2.02102	2.95685	1.3381	-1.61875	0.0854671	0.756616
ENSOCUT00000023946	ENSOCUG00000022860	---	---	ProteinCodingRNA	9.308	9.49714	9.42787	9.4131	9.53499	9.38767	9.411	9.44525	0.0342488	0.752263	0.986021
ENSOCUT00000023944	ENSOCUG00000026063	SCAF8	SR-related CTD associated factor 8	ProteinCodingRNA	12.0604	12.226	12.1528	12.2096	12.1061	12.1391	12.1464	12.1516	0.00519678	0.957559	0.999819
ENSOCUT00000023943	ENSOCUG00000025784	OR52B4	olfactory receptor family 52 subfamily B member 4 (gene/pseudogene)	ProteinCodingRNA	0	0	0	0	1.0087	0	0	0.336232	0.336232	0.80659	0.986021
ENSOCUT00000013888	ENSOCUG00000013882	DCAF17	DDB1 and CUL4 associated factor 17	ProteinCodingRNA	8.49561	8.24246	8.26056	8.21506	8.45608	8.25669	8.33288	8.30928	-0.0236037	0.862061	0.991372
ENSOCUT00000006889	ENSOCUG00000006891	---	---	ProteinCodingRNA	1.82162	0	2.45817	1.99327	2.59943	3.19481	1.4266	2.59584	1.16924	0.290573	0.980264
ENSOCUT00000033329	ENSOCUG00000029543	---	---	ProteinCodingRNA	9.17935	9.0161	8.92624	8.86141	8.85335	8.9378	9.04056	8.88419	-0.156377	0.183179	0.916005
MSTRG.10045.5	---	---	---	Predicted_LncRNA	9.25512	9.27075	9.06287	9.37042	9.23406	9.17002	9.19625	9.25816	0.0619176	0.623662	0.986021
ENSOCUT00000000598	ENSOCUG00000000598	HDAC2	histone deacetylase 2	ProteinCodingRNA	11.138	10.5268	10.3369	10.8096	9.67374	10.0846	10.6672	10.1893	-0.47792	0.19356	0.928347
MSTRG.10045.3	---	---	---	Predicted_LncRNA	11.6316	11.4541	11.6139	11.691	11.6339	11.293	11.5665	11.5393	-0.0272116	0.89486	0.997301
ENSOCUT00000003934	ENSOCUG00000015389	---	---	ProteinCodingRNA	10.4374	10.092	10.0736	10.3163	9.88305	10.0764	10.201	10.0919	-0.109087	0.536751	0.986021
ENSOCUT00000027253	ENSOCUG00000026018	---	---	OtherNonCodingRNA	6.50084	6.69973	6.37569	6.77247	6.67538	6.53545	6.52542	6.6611	0.135678	0.535767	0.986021
ENSOCUT00000002449	ENSOCUG00000002450	GRM4	glutamate metabotropic receptor 4	ProteinCodingRNA	1.82162	4.39164	4.68502	4.3134	3.33754	0	3.63276	2.55032	-1.08245	0.56334	0.986021
ENSOCUT00000027251	ENSOCUG00000004678	PHF14	PHD finger protein 14	ProteinCodingRNA	10.6937	10.476	10.472	10.5466	10.5082	10.3822	10.5473	10.479	-0.0682673	0.526791	0.986021
ENSOCUT00000027250	ENSOCUG00000025878	FRMD7	FERM domain containing 7	ProteinCodingRNA	0	4.39164	5.20796	5.38356	5.87502	6.33139	3.19987	5.86332	2.66346	0.122321	0.834102
ENSOCUT00000032630	ENSOCUG00000028635	RF00100	---	OtherNonCodingRNA	5.18931	4.39164	4.32946	5.23919	5.06121	4.55032	4.6368	4.95024	0.313439	0.524683	0.986021
ENSOCUT00000003244	ENSOCUG00000003248	ACTRT3	actin related protein T3	ProteinCodingRNA	3.58305	5.16923	5.25117	4.89822	5.14613	5.11461	4.66782	5.05299	0.38517	0.660966	0.986021
MSTRG.14656.4	---	---	---	Predicted_LncRNA	7.75229	8.33468	8.42996	8.04091	9.3004	9.06957	8.17231	8.80363	0.631314	0.054429	0.657409
MSTRG.14656.1	---	---	---	Predicted_LncRNA	10.3828	10.4861	10.2113	10.3486	11.5594	10.9973	10.3601	10.9684	0.608385	0.0217652	0.456368
ENSOCUT00000000513	ENSOCUG00000000510	PPRC1	peroxisome proliferator-activated receptor gamma, coactivator-related 1	ProteinCodingRNA	11.5156	11.4633	11.3507	11.6254	11.5117	11.4165	11.4432	11.5179	0.0746431	0.454135	0.986021
ENSOCUT00000000223	ENSOCUG00000000222	ANO5	anoctamin 5	ProteinCodingRNA	3.77336	5.42557	4.62058	4.63524	5.18679	5.83482	4.6065	5.21895	0.61245	0.333998	0.986021
MSTRG.7145.1	---	---	---	Predicted_LncRNA	7.49285	8.15411	8.3773	7.33093	8.0229	7.97036	8.00809	7.77473	-0.233357	0.43527	0.986021
ENSOCUT00000018026	ENSOCUG00000018026	RF00012	---	OtherNonCodingRNA	7.9177	8.36561	8.80098	7.75262	8.99172	8.43727	8.36143	8.39387	0.0324395	0.839691	0.988731
ENSOCUT00000003349	ENSOCUG00000003348	ATP5S	ATP synthase, H+ transporting, mitochondrial Fo complex subunit s (factor B)	ProteinCodingRNA	9.41008	9.35023	9.38001	9.15091	8.91515	9.24708	9.3801	9.10438	-0.275721	0.0361053	0.567922
ENSOCUT00000000590	ENSOCUG00000000592	RDH12	retinol dehydrogenase 12 (all-trans/9-cis/11-cis)	ProteinCodingRNA	9.50875	9.53845	9.56476	9.61126	10.006	10.1815	9.53732	9.93292	0.3956	0.0172173	0.419623
ENSOCUT00000007254	ENSOCUG00000007256	---	---	ProteinCodingRNA	0	0	0	1.99327	0	0	0	0.664425	0.664425	0.537999	0.986021
MSTRG.16962.2	---	---	---	Predicted_LncRNA	7.44469	7.14904	3.74004	5.31318	7.10468	6.70012	6.11126	6.37266	0.2614	0.782288	0.986021
ENSOCUT00000000597	ENSOCUG00000000597	RAD51B	RAD51 paralog B	ProteinCodingRNA	7.1763	7.11823	7.23329	7.39196	6.63187	6.61264	7.17594	6.87882	-0.297119	0.378338	0.986021
ENSOCUT00000003341	ENSOCUG00000003342	---	---	ProteinCodingRNA	9.90179	9.79857	9.80118	10.0037	9.68088	9.73874	9.83385	9.80776	-0.0260914	0.875062	0.993106
MSTRG.16962.1	---	---	---	Predicted_LncRNA	7.67089	6.55388	7.96857	8.1408	6.60212	6.82213	7.39778	7.18835	-0.20943	0.770547	0.986021
ENSOCUT00000003347	ENSOCUG00000003350	MRPS23	mitochondrial ribosomal protein S23	ProteinCodingRNA	8.47863	8.30307	8.19568	8.65283	8.1517	8.54359	8.32579	8.44937	0.123578	0.487139	0.986021
MSTRG.12523.1	---	---	---	Predicted_LncRNA	11.2573	11.0035	10.6731	11.23	10.3381	10.2004	10.978	10.5895	-0.388473	0.283799	0.979983
ENSOCUT00000003617	ENSOCUG00000003617	MTIF2	mitochondrial translational initiation factor 2	ProteinCodingRNA	9.27296	9.27774	9.24223	9.18826	9.2581	9.24223	9.26431	9.22953	-0.0347798	0.700066	0.986021
ENSOCUT00000003616	ENSOCUG00000003618	MACC1	MACC1, MET transcriptional regulator	ProteinCodingRNA	9.92831	9.65392	8.92291	10.2318	9.36161	9.03072	9.50171	9.54139	0.0396727	0.847618	0.989409
MSTRG.11967.13	---	---	---	Predicted_LncRNA	9.49868	9.17172	9.3305	9.53986	9.39452	9.06408	9.33363	9.33282	-0.000809222	0.97324	0.999819
MSTRG.8173.1	---	---	---	Predicted_LncRNA	3.36376	4.08679	1.69938	3.31385	2.82223	5.58196	3.04998	3.90602	0.856039	0.25588	0.969868
MSTRG.10474.1	---	---	---	Predicted_LncRNA	7.45167	7.614	7.24402	7.07856	7.34815	7.16732	7.43656	7.19801	-0.238557	0.202873	0.937999
ENSOCUT00000033128	ENSOCUG00000029103	COX3	Cytochrome c oxidase subunit 3	ProteinCodingRNA	16.1119	16.2854	16.0757	16.1198	15.8852	15.9275	16.1577	15.9775	-0.180169	0.171952	0.910728
MSTRG.6677.1	---	---	---	Predicted_LncRNA	9.07473	8.40443	8.26584	8.97404	7.85647	7.86073	8.58167	8.23041	-0.351254	0.448133	0.986021
ENSOCUT00000025045	ENSOCUG00000025403	---	---	ProteinCodingRNA	0	0	1.69938	0	1.59655	0	0.566458	0.532182	-0.0342766	0.972951	0.999819
ENSOCUT00000025046	ENSOCUG00000025757	TMEM200B	transmembrane protein 200B	ProteinCodingRNA	0	5.35686	0	4.23943	5.74493	5.88547	1.78562	5.28994	3.50432	0.475565	0.986021
ENSOCUT00000025040	ENSOCUG00000021366	---	---	ProteinCodingRNA	5.69197	5.39162	5.83769	5.63506	5.71745	6.13609	5.64043	5.82953	0.189103	0.509973	0.986021
ENSOCUT00000025043	ENSOCUG00000027959	---	---	ProteinCodingRNA	2.13084	1.58449	1.08665	2.79967	2.01302	1.60366	1.60066	2.13878	0.538127	0.502519	0.986021
ENSOCUT00000022012	ENSOCUG00000022735	---	---	ProteinCodingRNA	4.0187	4.08679	3.74004	3.79902	3.82346	3.93301	3.94851	3.85183	-0.0966807	0.805926	0.986021
ENSOCUT00000022010	ENSOCUG00000024255	---	---	OtherNonCodingRNA	4.22832	4.64317	4.40793	3.79902	4.60158	4.41896	4.42647	4.27319	-0.153283	0.773622	0.986021
ENSOCUT00000025049	ENSOCUG00000024849	MED1	mediator complex subunit 1	ProteinCodingRNA	12.0752	11.9972	11.9316	12.0255	11.8502	11.8167	12.0013	11.8975	-0.103853	0.305703	0.984034
ENSOCUT00000029974	ENSOCUG00000015244	---	---	ProteinCodingRNA	4.93416	5.24723	4.48235	5.54581	6.85008	6.64239	4.88791	6.34609	1.45818	0.000684331	0.0726639
ENSOCUT00000026255	ENSOCUG00000025101	C7orf49	chromosome 7 open reading frame 49	ProteinCodingRNA	5.40604	5.32123	5.6242	5.54581	5.06121	4.93393	5.45049	5.18032	-0.270177	0.446834	0.986021
ENSOCUT00000026256	ENSOCUG00000023008	---	---	OtherNonCodingRNA	6.13513	5.95349	6.54151	6.46686	4.71712	6.38518	6.21004	5.85638	-0.35366	0.712777	0.986021
ENSOCUT00000012683	ENSOCUG00000012690	---	---	ProteinCodingRNA	13.2985	13.1026	13.0702	13.2779	13.3598	13.1985	13.1571	13.2787	0.121652	0.275024	0.978101
ENSOCUT00000029970	ENSOCUG00000022985	---	---	ProteinCodingRNA	8.36491	9.11563	8.81904	8.56848	8.8052	9.11006	8.76653	8.82791	0.0613851	0.852329	0.99056
ENSOCUT00000012685	ENSOCUG00000012680	TLK1	tousled like kinase 1	ProteinCodingRNA	11.1493	11.3223	11.4115	11.3839	11.2952	11.1972	11.2944	11.2921	-0.00227394	0.973433	0.999819
ENSOCUT00000012686	ENSOCUG00000012692	---	---	ProteinCodingRNA	11.4272	10.952	10.7635	11.4499	10.5438	10.5719	11.0476	10.8552	-0.19235	0.610579	0.986021
ENSOCUT00000026253	ENSOCUG00000021451	---	---	OtherNonCodingRNA	3.10507	1.99947	3.14838	1.99327	2.01302	4.55032	2.75097	2.85221	0.101234	0.553601	0.986021
ENSOCUT00000011375	ENSOCUG00000011357	ITGA1	integrin subunit alpha 1	ProteinCodingRNA	10.3718	10.398	10.6781	10.2126	10.5526	10.8337	10.4826	10.533	0.0503499	0.736749	0.986021
ENSOCUT00000008735	ENSOCUG00000008735	MAK16	MAK16 homolog	ProteinCodingRNA	9.26704	9.19158	9.09287	9.34198	9.26524	9.12331	9.18383	9.24351	0.0596776	0.614611	0.986021
ENSOCUT00000029978	ENSOCUG00000004462	PCF11	PCF11 cleavage and polyadenylation factor subunit	ProteinCodingRNA	12.5779	12.9762	12.9077	12.8815	13.0731	12.9464	12.8206	12.967	0.146404	0.340918	0.986021
ENSOCUT00000029979	ENSOCUG00000021560	---	---	ProteinCodingRNA	3.24021	1.58449	0	2.31475	3.01518	4.19635	1.60823	3.17543	1.5672	0.252258	0.968791
ENSOCUT00000012938	ENSOCUG00000012932	SECISBP2	SECIS binding protein 2	ProteinCodingRNA	10.485	10.472	10.4432	10.558	10.4394	10.2362	10.4667	10.4112	-0.0555246	0.669384	0.986021
MSTRG.7854.1	---	---	---	Predicted_LncRNA	5.96993	1.58449	0	1.57899	0	2.34434	2.51814	1.30778	-1.21036	0.0746549	0.735859
ENSOCUT00000008592	ENSOCUG00000008592	---	---	ProteinCodingRNA	12.7634	11.9809	11.3618	12.4054	11.1569	11.0538	12.0354	11.5387	-0.496674	0.303739	0.983233
ENSOCUT00000008591	ENSOCUG00000008590	C17orf53	chromosome 17 open reading frame 53	ProteinCodingRNA	7.37296	6.74076	6.45175	7.36612	5.06121	5.19712	6.85516	5.87482	-0.980341	0.351958	0.986021
ENSOCUT00000008590	ENSOCUG00000008593	OMG	oligodendrocyte myelin glycoprotein	ProteinCodingRNA	8.23338	8.09732	8.1393	8.25315	8.07256	8.24219	8.15667	8.1893	0.0326326	0.808476	0.986021
ENSOCUT00000008597	ENSOCUG00000008601	ASB16	ankyrin repeat and SOCS box containing 16	ProteinCodingRNA	6.11768	5.78066	5.55692	5.31318	6.14638	5.72787	5.81842	5.72914	-0.0892765	0.829322	0.986329
MSTRG.14759.1	---	---	---	Predicted_LncRNA	7.76916	8.12341	8.23926	6.79846	7.47667	8.80926	8.04394	7.6948	-0.349144	0.817384	0.986021
ENSOCUT00000015411	ENSOCUG00000015413	PDCD10	programmed cell death 10	ProteinCodingRNA	9.66857	9.734	9.69565	9.80642	9.56614	9.66817	9.6994	9.68024	-0.0191616	0.882827	0.994327
ENSOCUT00000020704	ENSOCUG00000020704	RF00100	---	OtherNonCodingRNA	0	0	0	0	1.0087	0	0	0.336232	0.336232	0.80659	0.986021
ENSOCUT00000002843	ENSOCUG00000002843	---	---	ProteinCodingRNA	0	0	0	0.99552	2.01302	0	0	1.00285	1.00285	0.4124	0.986021
ENSOCUT00000008598	ENSOCUG00000008599	DLX5	distal-less homeobox 5	ProteinCodingRNA	7.48607	8.61767	9.19045	7.72578	9.75372	9.59208	8.4314	9.02386	0.59246	0.235821	0.95705
ENSOCUT00000011014	ENSOCUG00000011012	HABP2	hyaluronan binding protein 2	ProteinCodingRNA	3.10507	2.58437	0	0	0	0	1.89648	0	-1.89648	0.0804271	0.745179
ENSOCUT00000011016	ENSOCUG00000011014	P3H2	prolyl 3-hydroxylase 2	ProteinCodingRNA	10.7717	11.2377	11.7872	11.0778	12.0908	11.8212	11.2655	11.6633	0.397723	0.237909	0.958738
ENSOCUT00000020703	ENSOCUG00000020703	RF00001	---	OtherNonCodingRNA	0	0.999643	0	0	0	1.01405	0.333214	0.338016	0.00480181	0.992719	0.999819
MSTRG.4920.1	---	---	---	Predicted_LncRNA	6.41773	6.39161	6.54151	6.12044	6.71761	5.86037	6.45029	6.23281	-0.217479	0.5671	0.986021
ENSOCUT00000029483	ENSOCUG00000027034	---	---	ProteinCodingRNA	2.13084	2.58437	3.74004	2.99215	3.33754	3.19481	2.81842	3.17483	0.356417	0.737457	0.986021
ENSOCUT00000002841	ENSOCUG00000002840	---	---	ProteinCodingRNA	10.9762	11.2179	11.3575	11.3392	11.2724	11.293	11.1839	11.3015	0.117663	0.38757	0.986021
ENSOCUT00000033279	ENSOCUG00000029713	---	---	ProteinCodingRNA	6.59211	6.40869	6.65847	6.66354	6.22656	6.07194	6.55309	6.32068	-0.232412	0.40795	0.986021
ENSOCUT00000025797	ENSOCUG00000021665	---	---	ProteinCodingRNA	6.67795	7.06538	6.55881	6.79846	7.17709	6.50338	6.76738	6.82631	0.0589306	0.806833	0.986021
ENSOCUT00000016947	ENSOCUG00000016938	UBXN11	UBX domain protein 11	ProteinCodingRNA	7.26615	7.41714	7.79694	7.57604	7.68968	7.66445	7.49341	7.64339	0.149976	0.495599	0.986021
MSTRG.13392.1	---	---	---	Predicted_LncRNA	8.38693	8.55388	8.82977	8.5571	8.36601	8.37661	8.59019	8.43324	-0.156951	0.340034	0.986021
MSTRG.11796.1	---	---	---	Predicted_LncRNA	9.34033	9.03271	9.29739	9.46068	9.68088	9.32713	9.22348	9.48956	0.266085	0.0899316	0.767162
MSTRG.13052.1	---	---	---	Predicted_LncRNA	9.17935	8.93887	9.08692	9.09695	9.03411	8.48321	9.06838	8.87143	-0.196955	0.391633	0.986021
ENSOCUT00000014941	ENSOCUG00000014937	MTMR12	myotubularin related protein 12	ProteinCodingRNA	10.2629	10.2026	10.1253	10.049	10.3913	10.3487	10.197	10.263	0.0660621	0.582649	0.986021
ENSOCUT00000032327	ENSOCUG00000028332	RF00026	---	OtherNonCodingRNA	1.82162	1.58449	0	1.57899	2.59943	2.02102	1.13537	2.06648	0.931108	0.384794	0.986021
ENSOCUT00000013986	ENSOCUG00000013971	AOX1	aldehyde oxidase 1	ProteinCodingRNA	10.8998	11.2835	11.3971	10.394	13.5227	13.1938	11.1935	12.3702	1.17669	0.0417514	0.597152
ENSOCUT00000031588	ENSOCUG00000023337	HOXB3	homeobox B3	ProteinCodingRNA	0	0	0	1.99327	0	0	0	0.664425	0.664425	0.537999	0.986021
ENSOCUT00000019225	ENSOCUG00000019225	---	---	OtherNonCodingRNA	1.42753	0	0	0	0	0	0.475843	0	-0.475843	0.68719	0.986021
ENSOCUT00000032329	ENSOCUG00000028334	RF00426	---	OtherNonCodingRNA	4.09201	3.32129	3.47433	4.3134	3.60086	4.19635	3.62921	4.03687	0.407663	0.440721	0.986021
ENSOCUT00000019221	ENSOCUG00000019221	---	---	OtherNonCodingRNA	0.883565	0.999643	1.08665	0.99552	1.0087	1.01405	0.989953	1.00609	0.0161357	0.981615	0.999819
ENSOCUT00000004668	ENSOCUG00000004669	TMED10	transmembrane emp24 domain-containing protein 10 precursor	ProteinCodingRNA	10.7669	10.7774	10.8336	10.7333	10.9795	11.1048	10.7926	10.9392	0.146587	0.223022	0.950875
ENSOCUT00000019205	ENSOCUG00000019205	---	---	OtherNonCodingRNA	1.42753	1.58449	1.08665	0.99552	2.33582	1.01405	1.36622	1.44846	0.0822397	0.810358	0.986021
ENSOCUT00000026667	ENSOCUG00000026553	PSMD8	proteasome 26S subunit, non-ATPase 8	ProteinCodingRNA	12.7066	12.4376	11.9328	12.801	11.6889	11.884	12.359	12.1246	-0.234358	0.589434	0.986021
ENSOCUT00000026666	ENSOCUG00000024720	RF00004	---	OtherNonCodingRNA	10.2826	9.90918	10.2208	10.1471	10.6853	11.201	10.1375	10.6778	0.540286	0.0330792	0.550069
MSTRG.2277.1	---	---	---	Predicted_LncRNA	10.0344	9.46281	9.36041	9.9262	9.58907	9.4073	9.61921	9.64086	0.0216486	0.982419	0.999819
ENSOCUT00000026660	ENSOCUG00000024759	---	---	ProteinCodingRNA	2.13084	0	2.72661	3.16195	0	0	1.61915	1.05398	-0.565167	0.93979	0.999819
ENSOCUT00000026663	ENSOCUG00000017076	EIF2B4	translation initiation factor eIF-2B subunit delta	ProteinCodingRNA	7.36559	6.80665	5.44971	7.07856	4.82408	5.45358	6.54065	5.78541	-0.755243	0.366032	0.986021
ENSOCUT00000026662	ENSOCUG00000009444	ALDH1A1	retinal dehydrogenase 1	ProteinCodingRNA	11.9359	11.9436	11.7594	11.2885	12.0921	11.6344	11.8797	11.6717	-0.207978	0.432634	0.986021
MSTRG.15988.1	---	---	---	Predicted_LncRNA	9.32711	9.34358	9.17651	9.62403	9.1997	9.14426	9.2824	9.32266	0.0402654	0.754444	0.986021
ENSOCUT00000028586	ENSOCUG00000022827	---	---	ProteinCodingRNA	3.68134	3.80669	3.47433	3.69216	1.59655	3.61062	3.65412	2.96644	-0.687682	0.519276	0.986021
ENSOCUT00000033816	ENSOCUG00000002776	C10orf76	chromosome 10 open reading frame 76	ProteinCodingRNA	6.71323	7.06538	6.93511	7.83027	6.94794	6.34954	6.90458	7.04258	0.138008	0.520946	0.986021
ENSOCUT00000023997	ENSOCUG00000023329	---	---	ProteinCodingRNA	0	0	0	0	0	1.60366	0	0.534555	0.534555	0.636309	0.986021
MSTRG.12843.1	---	---	---	Predicted_LncRNA	6.91862	7.75418	7.72979	7.75925	8.03964	7.91659	7.46753	7.90516	0.437631	0.149508	0.882866
ENSOCUT00000015003	ENSOCUG00000015005	GPC4	glypican 4	ProteinCodingRNA	11.4896	11.3133	10.7885	11.6871	10.7747	10.889	11.1971	11.117	-0.0801667	0.868538	0.992697
ENSOCUT00000033813	ENSOCUG00000007206	ANKRD52	ankyrin repeat domain 52	ProteinCodingRNA	10.2288	10.173	10.3205	10.1022	9.61909	10.0981	10.2408	9.93977	-0.300982	0.0889976	0.765519
ENSOCUT00000023055	ENSOCUG00000022226	SPNS1	sphingolipid transporter 1 (putative)	ProteinCodingRNA	9.87218	9.69799	9.52129	9.90093	9.35493	9.65546	9.69716	9.63711	-0.0600477	0.787323	0.986021
ENSOCUT00000033818	ENSOCUG00000001414	DDX23	DEAD-box helicase 23	ProteinCodingRNA	11.2717	10.1842	10.0432	10.1484	10.1747	10.1991	10.4997	10.1741	-0.325634	0.186507	0.920244
ENSOCUT00000033819	ENSOCUG00000029640	ORY1	Oryctolagus cuniculus syncytin-Ory1 (ORY1), mRNA.	ProteinCodingRNA	6.52751	7.09732	6.6095	6.75929	6.63187	6.65704	6.74478	6.68274	-0.0620449	0.735969	0.986021
ENSOCUT00000023053	ENSOCUG00000026923	HPF1	histone PARylation factor 1	ProteinCodingRNA	8.77422	8.69973	8.67574	8.82077	8.66115	8.75922	8.71656	8.74705	0.0304809	0.789441	0.986021
MSTRG.8063.1	---	---	---	Predicted_LncRNA	1.82162	0	2.72661	4.69181	3.18535	5.38484	1.51608	4.42067	2.90459	0.00185928	0.131957
ENSOCUT00000006797	ENSOCUG00000006799	COQ6	coenzyme Q6, monooxygenase	ProteinCodingRNA	8.86852	8.78065	8.75669	8.89191	8.78879	8.71089	8.80195	8.7972	-0.00475425	0.967305	0.999819
ENSOCUT00000006745	ENSOCUG00000006748	HEXIM1	hexamethylene bisacetamide inducible 1	ProteinCodingRNA	8.95702	9.21118	9.21248	9.34859	10.0017	9.98068	9.12689	9.777	0.650109	0.00179763	0.130243
ENSOCUT00000001617	ENSOCUG00000001617	MTMR8	myotubularin related protein 8	ProteinCodingRNA	6.87775	6.80665	6.5928	6.71903	6.64652	6.64239	6.75907	6.66931	-0.0897515	0.617791	0.986021
ENSOCUT00000001616	ENSOCUG00000001610	PPIP5K2	diphosphoinositol pentakisphosphate kinase 2	ProteinCodingRNA	11.1738	10.8789	10.8301	11.1446	10.6366	10.5844	10.9609	10.7886	-0.172357	0.431396	0.986021
ENSOCUT00000009464	ENSOCUG00000009466	HEPHL1	hephaestin like 1	ProteinCodingRNA	14.8773	14.4084	12.5218	14.965	9.10742	10.071	13.9358	11.3811	-2.55468	0.620753	0.986021
MSTRG.8985.1	---	---	---	Predicted_LncRNA	8.529	8.50311	8.34276	8.36174	8.51714	8.4159	8.45829	8.43159	-0.0266997	0.817379	0.986021
ENSOCUT00000001618	ENSOCUG00000001618	HGF	hepatocyte growth factor precursor	ProteinCodingRNA	8.07062	8.54618	8.22307	7.61312	8.59849	9.34759	8.27996	8.51974	0.239779	0.351293	0.986021
ENSOCUT00000006827	ENSOCUG00000006823	APPL1	adaptor protein, phosphotyrosine interacting with PH domain and leucine zipper 1	ProteinCodingRNA	11.0085	11.0161	11.4269	11.0672	11.3302	11.3561	11.1505	11.2512	0.100661	0.578985	0.986021
ENSOCUT00000028583	ENSOCUG00000028136	---	---	OtherNonCodingRNA	5.34737	7.83849	7.86111	7.84905	5.68943	4.41896	7.01566	5.98581	-1.02985	0.418	0.986021
MSTRG.16208.1	---	---	---	Predicted_LncRNA	9.45593	9.4023	9.51244	9.57035	9.55453	9.51174	9.45689	9.54554	0.0886547	0.321619	0.986021
ENSOCUT00000010423	ENSOCUG00000010425	FABP5	fatty acid binding protein 5	ProteinCodingRNA	13.7375	13.5674	13.3444	13.4794	13.3084	13.8227	13.5498	13.5368	-0.0129463	0.975659	0.999819
ENSOCUT00000010426	ENSOCUG00000010419	IARS2	isoleucyl-tRNA synthetase 2, mitochondrial	ProteinCodingRNA	10.8082	10.8611	10.8513	10.9335	10.9325	10.7853	10.8402	10.8838	0.0435581	0.587262	0.986021
ENSOCUT00000028580	ENSOCUG00000027648	---	---	ProteinCodingRNA	9.04504	8.71697	8.71486	8.87674	8.98597	9.18779	8.82562	9.01683	0.191213	0.258482	0.970468
ENSOCUT00000032499	ENSOCUG00000028504	---	---	OtherNonCodingRNA	1.82162	2.32136	1.08665	1.57899	1.0087	1.01405	1.74321	1.20058	-0.542633	0.469283	0.986021
ENSOCUT00000007827	ENSOCUG00000007827	SASS6	SAS-6 centriolar assembly protein	ProteinCodingRNA	8.12839	7.62134	7.41527	7.90395	6.95971	7.1977	7.72167	7.35379	-0.367879	0.307839	0.984896
ENSOCUT00000010428	ENSOCUG00000010426	AGFG1	ArfGAP with FG repeats 1	ProteinCodingRNA	11.3363	11.4012	11.2086	11.3541	11.3488	11.3805	11.3154	11.3611	0.0457622	0.612273	0.986021
ENSOCUT00000010429	ENSOCUG00000010430	KHDC4	KH domain containing 4, pre-mRNA splicing factor	ProteinCodingRNA	10.1622	9.96795	10.1078	9.87368	10.0549	9.75585	10.0793	9.8948	-0.184533	0.150022	0.882866
ENSOCUT00000032491	ENSOCUG00000028496	RF00001	---	OtherNonCodingRNA	2.13084	1.58449	1.69938	1.57899	0	0	1.8049	0.526329	-1.27857	0.259946	0.970468
ENSOCUT00000032490	ENSOCUG00000028495	RF00001	---	OtherNonCodingRNA	1.42753	0.999643	2.1281	1.57899	2.33582	1.60366	1.51842	1.83949	0.321065	0.708048	0.986021
ENSOCUT00000019489	ENSOCUG00000019489	RF00418	---	OtherNonCodingRNA	0.883565	0	1.08665	0.99552	0	0	0.656738	0.33184	-0.324898	0.769493	0.986021
ENSOCUT00000012580	ENSOCUG00000012587	---	---	ProteinCodingRNA	8.82886	8.77737	8.65578	8.91586	8.38361	8.31328	8.754	8.53758	-0.216421	0.353782	0.986021
ENSOCUT00000023446	ENSOCUG00000011054	PIK3CD	phosphatidylinositol-4,5-bisphosphate 3-kinase catalytic subunit delta	ProteinCodingRNA	5.71536	6.76748	7.39615	6.25793	7.48485	7.31319	6.62633	7.01865	0.392326	0.513031	0.986021
ENSOCUT00000006429	ENSOCUG00000006431	---	---	ProteinCodingRNA	0	0	2.1281	1.99327	0	0	0.709366	0.664425	-0.0449406	0.964111	0.999819
ENSOCUT00000019486	ENSOCUG00000019486	RF00421	small nucleolar RNA, H/ACA box 32	OtherNonCodingRNA	6.02712	5.95349	5.37354	5.74608	6.06147	6.27553	5.78472	6.02769	0.242974	0.472286	0.986021
ENSOCUT00000019957	ENSOCUG00000019957	---	---	OtherNonCodingRNA	2.6016	2.32136	2.72661	2.57749	2.82223	3.19481	2.54986	2.86484	0.314986	0.600174	0.986021
ENSOCUT00000023999	ENSOCUG00000025154	MIA3	MIA family member 3, ER export factor	ProteinCodingRNA	11.7177	11.8266	11.9098	11.7388	12.0289	12.1717	11.818	11.9798	0.161747	0.242335	0.962103
ENSOCUT00000005972	ENSOCUG00000005972	HESX1	HESX homeobox 1	ProteinCodingRNA	2.13084	0	2.1281	3.79902	0	0	1.41964	1.26634	-0.153303	0.686886	0.986021
ENSOCUT00000005757	ENSOCUG00000005759	PHGDH	phosphoglycerate dehydrogenase	ProteinCodingRNA	10.7808	11.0182	10.8894	11.0231	9.23163	9.8369	10.8961	10.0305	-0.865586	0.107234	0.8068
ENSOCUT00000005754	ENSOCUG00000005756	TMEM41B	transmembrane protein 41B	ProteinCodingRNA	9.09047	8.93003	8.6598	9.09957	8.78217	8.97335	8.89343	8.9517	0.0582654	0.764678	0.986021
ENSOCUT00000005755	ENSOCUG00000005754	PXN	paxillin	ProteinCodingRNA	10.9263	10.9411	10.9877	11.0238	10.4961	10.4709	10.9517	10.6636	-0.288105	0.143526	0.874476
ENSOCUT00000005976	ENSOCUG00000005970	COPG1	coatomer protein complex subunit gamma 1	ProteinCodingRNA	12.0261	12.1907	12.2568	12.0561	12.0432	12.278	12.1578	12.1257	-0.0321037	0.79553	0.986021
ENSOCUT00000005977	ENSOCUG00000005977	FAM185A	family with sequence similarity 185 member A	ProteinCodingRNA	7.28971	7.04369	6.9218	7.08912	7.26515	6.83507	7.08507	7.06312	-0.0219517	0.915817	0.999819
ENSOCUT00000005750	ENSOCUG00000005752	---	---	OtherNonCodingRNA	4.35286	4.95351	4.68502	4.57636	4.54015	5.0271	4.66379	4.71454	0.0507428	0.891616	0.996392
ENSOCUT00000005751	ENSOCUG00000005753	ROPN1L	rhophilin associated tail protein 1 like	ProteinCodingRNA	2.13084	2.32136	1.69938	3.16195	3.60086	3.61062	2.05052	3.45781	1.40729	0.0275129	0.512236
ENSOCUT00000005978	ENSOCUG00000005975	ACTR1B	ARP1 actin related protein 1 homolog B	ProteinCodingRNA	9.50708	9.57672	9.6976	9.22706	9.8295	9.89212	9.5938	9.64956	0.0557578	0.687629	0.986021
ENSOCUT00000007638	ENSOCUG00000007640	GNA13	G protein subunit alpha 13	ProteinCodingRNA	9.66106	9.57294	9.73233	9.67403	9.65756	9.67178	9.65544	9.66779	0.0123522	0.899903	0.99842
ENSOCUT00000003462	ENSOCUG00000023535	HIST2H2BE	histone cluster 2 H2B family member e	ProteinCodingRNA	11.1266	11.032	11.0983	11.3726	10.6449	10.5816	11.0856	10.8663	-0.219306	0.461523	0.986021
ENSOCUT00000028727	ENSOCUG00000026126	MB	myoglobin	ProteinCodingRNA	3.68134	3.58431	0	2.31475	3.82346	1.60366	2.42188	2.58063	0.158745	0.839293	0.98862
ENSOCUT00000008056	ENSOCUG00000008053	---	---	ProteinCodingRNA	9.91069	9.74412	9.79389	9.69667	9.87219	9.82721	9.81623	9.79869	-0.0175438	0.862521	0.991372
ENSOCUT00000031678	ENSOCUG00000024838	---	---	ProteinCodingRNA	0	0.999643	3.47433	4.45087	0	1.60366	1.49133	2.01818	0.526851	0.594754	0.986021
ENSOCUT00000028942	ENSOCUG00000020928	---	---	ProteinCodingRNA	0	0	0	1.57899	0	0	0	0.526329	0.526329	0.642233	0.986021
ENSOCUT00000018579	ENSOCUG00000018579	RF00100	---	OtherNonCodingRNA	3.85986	4.08679	4.15842	2.99215	3.33754	3.48487	4.03502	3.27152	-0.7635	0.12002	0.831191
ENSOCUT00000018575	ENSOCUG00000018575	---	---	OtherNonCodingRNA	0.883565	1.58449	2.1281	1.57899	2.33582	2.34434	1.53205	2.08638	0.554331	0.506159	0.986021
ENSOCUT00000031671	ENSOCUG00000027905	RF01210	---	OtherNonCodingRNA	0	0.999643	0	0	0	0	0.333214	0	-0.333214	0.820752	0.986021
ENSOCUT00000031676	ENSOCUG00000026978	PROKR1	prokineticin receptor 1	ProteinCodingRNA	4.22832	5.39162	5.6567	3.99159	5.4432	5.0271	5.09221	4.82063	-0.271585	0.636696	0.986021
ENSOCUT00000031677	ENSOCUG00000022194	---	---	ProteinCodingRNA	7.75794	6.94181	6.09652	7.46681	5.18679	5.83482	6.93209	6.16281	-0.76928	0.37276	0.986021
ENSOCUT00000028948	ENSOCUG00000026328	ORYCUNV1R1517	vomeronasal 1 receptor oryCunV1R1517	ProteinCodingRNA	0	0	0	0	0	3.0245	0	1.00817	1.00817	0.345933	0.986021
ENSOCUT00000031675	ENSOCUG00000027907	RF00056	---	OtherNonCodingRNA	6.29891	6.88194	7.6021	6.87375	8.00026	7.64253	6.92765	7.50551	0.577868	0.200985	0.936717
ENSOCUT00000010769	ENSOCUG00000010770	PAK5	p21 (RAC1) activated kinase 5	ProteinCodingRNA	3.77336	1.99947	2.1281	2.57749	2.01302	3.34712	2.63364	2.64588	0.0122374	0.853908	0.990837
ENSOCUT00000009641	ENSOCUG00000009628	FRYL	FRY like transcription coactivator	ProteinCodingRNA	13.4319	13.2539	13.1242	13.3966	13.2831	13.1043	13.27	13.2613	-0.00867265	0.946465	0.999819
ENSOCUT00000009642	ENSOCUG00000009637	NCOA6	nuclear receptor coactivator 6	ProteinCodingRNA	11.9171	12.0887	12.1298	12.0672	12.1822	12.023	12.0452	12.0908	0.0455845	0.663156	0.986021
ENSOCUT00000009645	ENSOCUG00000009644	TUBE1	tubulin epsilon 1	ProteinCodingRNA	9.00289	10.9629	11.2072	10.959	9.53499	9.64815	10.391	10.0474	-0.343639	0.537427	0.986021
ENSOCUT00000009646	ENSOCUG00000009647	MTHFD2L	methylenetetrahydrofolate dehydrogenase (NADP+ dependent) 2 like	ProteinCodingRNA	6.71323	7.01052	7.2006	7.07856	7.57949	7.37652	6.97478	7.34486	0.370073	0.116037	0.824207
ENSOCUT00000028059	ENSOCUG00000014904	EPAS1	endothelial PAS domain protein 1	ProteinCodingRNA	13.0228	13.1049	13.1951	12.8517	13.7091	13.4437	13.1076	13.3348	0.227247	0.251708	0.968372
ENSOCUT00000009648	ENSOCUG00000009646	---	---	ProteinCodingRNA	3.58305	5.85728	6.31589	7.39196	3.33754	1.01405	5.25207	3.91452	-1.33756	0.840056	0.988731
ENSOCUT00000010760	ENSOCUG00000010762	CHAC1	ChaC glutathione specific gamma-glutamylcyclotransferase 1	ProteinCodingRNA	12.0996	11.5341	9.51244	12.444	7.29335	7.07215	11.0487	8.93651	-2.11219	0.768113	0.986021
ENSOCUT00000010763	ENSOCUG00000010766	LAMP5	lysosomal associated membrane protein family member 5	ProteinCodingRNA	4.8093	4.64317	5.20796	3.57674	2.01302	0	4.88681	1.86325	-3.02355	0.00388959	0.198313
ENSOCUT00000010762	ENSOCUG00000010755	PLCB4	phospholipase C beta 4	ProteinCodingRNA	9.80155	10.1401	10.2477	9.09957	11.0138	10.8648	10.0631	10.3261	0.262923	0.289763	0.979983
ENSOCUT00000010764	ENSOCUG00000010764	WWP2	WW domain containing E3 ubiquitin protein ligase 2	ProteinCodingRNA	11.0778	11.3336	11.1591	11.218	11.4716	11.4299	11.1902	11.3732	0.183029	0.141081	0.872298
ENSOCUT00000010767	ENSOCUG00000010763	INO80	INO80 complex subunit	ProteinCodingRNA	11.4925	11.5534	11.6801	11.4748	11.8585	11.6546	11.5753	11.6626	0.087303	0.489053	0.986021
ENSOCUT00000010766	ENSOCUG00000010772	---	---	ProteinCodingRNA	7.49285	8.05999	8.15645	7.40047	7.57949	8.60909	7.9031	7.86302	-0.0400781	0.923482	0.999819
ENSOCUT00000019787	ENSOCUG00000019787	RF00277	small nucleolar RNA, C/D box 49B	OtherNonCodingRNA	3.47757	2.58437	3.32054	2.79967	3.82346	3.34712	3.12749	3.32342	0.195923	0.737148	0.986021
ENSOCUT00000013983	ENSOCUG00000013984	LIPI	lipase I	ProteinCodingRNA	3.10507	3.80669	2.1281	0	3.82346	5.0271	3.01329	2.95019	-0.0630994	0.486658	0.986021
ENSOCUT00000010505	ENSOCUG00000010507	NPR3	natriuretic peptide receptor 3	ProteinCodingRNA	9.01943	9.02443	9.99635	9.00506	7.5871	7.57471	9.34673	8.05563	-1.29111	0.0103284	0.334049
MSTRG.2799.1	---	---	---	Predicted_LncRNA	4.93416	3.90623	4.40793	3.16195	3.82346	2.83136	4.4161	3.27226	-1.14385	0.0348807	0.560139
ENSOCUT00000014428	ENSOCUG00000014433	NYAP2	neuronal tyrosine-phosphorylated phosphoinositide-3-kinase adaptor 2	ProteinCodingRNA	3.10507	3.58431	4.24647	3.89852	3.33754	3.0245	3.64528	3.42019	-0.225097	0.679048	0.986021
ENSOCUT00000014427	ENSOCUG00000014424	HFE	hemochromatosis	ProteinCodingRNA	7.43767	7.78719	8.06859	7.68456	7.74518	8.17252	7.76448	7.86742	0.102934	0.688617	0.986021
ENSOCUT00000014424	ENSOCUG00000014428	NAT1	arylamine N-acetyltransferase 1	ProteinCodingRNA	5.9305	6.18912	6.25351	4.7987	5.94779	6.09364	6.12438	5.61338	-0.510999	0.301867	0.983233
ENSOCUT00000012373	ENSOCUG00000012376	SUCLG2	succinate-CoA ligase GDP-forming beta subunit	ProteinCodingRNA	11.4017	11.2672	11.0593	11.4809	10.7946	11.0961	11.2428	11.1238	-0.118932	0.635146	0.986021
ENSOCUT00000014420	ENSOCUG00000014421	MPZ	myelin protein zero	ProteinCodingRNA	11.0032	10.4981	11.1072	8.74927	10.6126	10.2029	10.8695	9.85491	-1.01458	0.0492518	0.640609
ENSOCUT00000014421	ENSOCUG00000014419	PKD2L2	polycystin 2 like 2, transient receptor potential cation channel	ProteinCodingRNA	6.00831	5.72722	5.02088	5.4175	5.47638	5.88547	5.58547	5.59312	0.00764598	0.908499	0.999819
MSTRG.763.1	---	---	---	Predicted_LncRNA	9.90942	11.0471	11.4257	10.6731	12.5167	11.7787	10.7941	11.6562	0.86209	0.0664127	0.707872
ENSOCUT00000031418	ENSOCUG00000027738	RF00003	---	OtherNonCodingRNA	2.6016	3.16929	2.95286	2.99215	3.71645	3.34712	2.90791	3.35191	0.443993	0.420782	0.986021
ENSOCUT00000031419	ENSOCUG00000026367	CTXN2	cortexin 2	ProteinCodingRNA	1.42753	0	0	0	0	0	0.475843	0	-0.475843	0.68719	0.986021
ENSOCUT00000031416	ENSOCUG00000023564	---	---	OtherNonCodingRNA	7.02541	5.97658	5.55692	7.09962	4.40884	4.83433	6.1863	5.44759	-0.738707	0.636282	0.986021
ENSOCUT00000009503	ENSOCUG00000009505	PLAGL1	PLAG1 like zinc finger 1	ProteinCodingRNA	7.34324	7.45872	7.57684	6.95688	7.46018	7.86705	7.4596	7.42804	-0.0315656	0.962104	0.999819
ENSOCUT00000019925	ENSOCUG00000019925	RF00090	---	OtherNonCodingRNA	3.10507	3.80669	4.62058	3.79902	2.01302	2.34434	3.84411	2.7188	-1.12532	0.170976	0.909815
MSTRG.8030.1	---	---	---	Predicted_LncRNA	8.24949	8.06538	7.96209	8.37907	8.2316	7.94671	8.09232	8.18579	0.0934753	0.592198	0.986021
ENSOCUT00000031413	ENSOCUG00000005439	CCNJL	cyclin J like	ProteinCodingRNA	8.59353	7.80664	6.72128	8.91882	5.37447	5.78234	7.70715	6.69188	-1.01528	0.791195	0.986021
ENSOCUT00000031410	ENSOCUG00000029295	FBP1	fructose-bisphosphatase 1	ProteinCodingRNA	10.5061	9.93002	8.44865	10.3541	7.09403	7.16732	9.62825	8.20514	-1.42311	0.475051	0.986021
ENSOCUT00000027828	ENSOCUG00000003441	FAAH	fatty acid amide hydrolase	ProteinCodingRNA	0	0	0	0	0	1.01405	0	0.338016	0.338016	0.80659	0.986021
ENSOCUT00000027829	ENSOCUG00000025471	---	---	OtherNonCodingRNA	5.28621	5.28471	5.06997	5.03569	5.1043	4.98127	5.21363	5.04042	-0.173211	0.554759	0.986021
ENSOCUT00000027539	ENSOCUG00000013062	ACSL6	long-chain-fatty-acid--CoA ligase 6	ProteinCodingRNA	7.20137	6.14904	5.55692	6.77247	5.26481	4.41896	6.30244	5.48541	-0.817028	0.346699	0.986021
ENSOCUT00000009501	ENSOCUG00000009500	TIMMDC1	translocase of inner mitochondrial membrane domain containing 1	ProteinCodingRNA	8.93478	8.81947	8.81185	8.91289	8.66475	8.77609	8.85536	8.78458	-0.0707869	0.580325	0.986021
ENSOCUT00000021250	ENSOCUG00000027075	---	---	ProteinCodingRNA	1.82162	0.999643	2.72661	0.99552	1.0087	1.01405	1.84929	1.00609	-0.843206	0.255835	0.969868
ENSOCUT00000018208	ENSOCUG00000018208	RF00092	---	OtherNonCodingRNA	4.57368	4.69975	5.25117	4.16145	4.87473	5.48676	4.84153	4.84098	-0.000554297	0.878547	0.993824
ENSOCUT00000027821	ENSOCUG00000027040	LOXL3	lysyl oxidase like 3	ProteinCodingRNA	9.48513	10.1026	9.89442	9.13059	9.80359	10.318	9.82738	9.75071	-0.0766619	0.952129	0.999819
ENSOCUT00000027824	ENSOCUG00000015173	ZC3H13	zinc finger CCCH-type containing 13	ProteinCodingRNA	7.75229	7.35684	8.01319	7.93358	8.47672	7.84802	7.70744	8.08611	0.378665	0.158879	0.894412
MSTRG.3042.1	---	---	---	Predicted_LncRNA	7.53946	7.49114	7.61869	7.60578	7.29335	7.55919	7.54977	7.48611	-0.0636566	0.735102	0.986021
ENSOCUT00000027826	ENSOCUG00000014267	RDX	radixin	ProteinCodingRNA	11.221	11.1977	11.1341	11.0429	11.0699	11.2906	11.1843	11.1345	-0.0498011	0.661572	0.986021
ENSOCUT00000002991	ENSOCUG00000002994	CCDC3	coiled-coil domain containing 3	ProteinCodingRNA	6.95837	6.98798	8.05036	6.53028	8.27467	8.36327	7.33224	7.72274	0.390504	0.343974	0.986021
ENSOCUT00000002993	ENSOCUG00000002993	WDR47	WD repeat domain 47	ProteinCodingRNA	11.5989	11.7225	11.7021	11.7517	11.6117	11.5412	11.6745	11.6349	-0.0396696	0.6965	0.986021
ENSOCUT00000002995	ENSOCUG00000002984	DOCK9	dedicator of cytokinesis 9	ProteinCodingRNA	12.4587	12.0871	12.3342	11.8798	10.9554	12.1234	12.2933	11.6529	-0.640467	0.0582477	0.678177
MSTRG.15737.1	---	---	---	Predicted_LncRNA	6.67795	6.81947	6.78147	5.84916	7.57184	7.59006	6.75963	7.00369	0.244053	0.346674	0.986021
ENSOCUT00000001248	ENSOCUG00000001248	---	---	ProteinCodingRNA	3.36376	3.32129	1.69938	2.99215	2.33582	0	2.79481	1.77599	-1.01882	0.445074	0.986021
ENSOCUT00000002999	ENSOCUG00000003000	BCL2L14	BCL2 like 14	ProteinCodingRNA	5.22234	4.9062	4.91738	5.3488	4.82408	5.78234	5.01531	5.3184	0.303099	0.365576	0.986021
ENSOCUT00000002998	ENSOCUG00000002998	PKDCC	protein kinase domain containing, cytoplasmic	ProteinCodingRNA	7.226	7.52285	7.92921	6.9911	7.35708	8.10468	7.55935	7.48428	-0.0750688	0.94203	0.999819
ENSOCUT00000032195	ENSOCUG00000026467	---	---	ProteinCodingRNA	0	0	0	0	0	2.6083	0	0.869434	0.869434	0.414334	0.986021
ENSOCUT00000017076	ENSOCUG00000017073	ARR3	arrestin 3	ProteinCodingRNA	0	1.58449	0	0	2.59943	2.02102	0.528162	1.54015	1.01199	0.370566	0.986021
ENSOCUT00000019083	ENSOCUG00000019083	---	---	OtherNonCodingRNA	1.42753	2.32136	2.1281	1.99327	3.18535	3.72627	1.95899	2.9683	1.0093	0.13752	0.867309
MSTRG.11222.1	---	---	---	Predicted_LncRNA	3.47757	4.58428	4.40793	3.57674	3.60086	4.1138	4.15659	3.7638	-0.392791	0.397739	0.986021
ENSOCUT00000030237	ENSOCUG00000003641	LHX8	LIM homeobox 8	ProteinCodingRNA	7.70049	8.83534	6.2321	6.31307	7.37479	5.95825	7.58931	6.5487	-1.04061	0.0520199	0.647258
MSTRG.13834.1	---	---	---	Predicted_LncRNA	9.47318	9.53262	9.12807	9.90542	9.91365	9.71092	9.37796	9.84333	0.465377	0.00299414	0.17082
ENSOCUT00000032087	ENSOCUG00000000407	DCT	dopachrome tautomerase	ProteinCodingRNA	8.23338	7.65034	6.55881	8.18088	6.7451	5.64211	7.48084	6.85603	-0.624816	0.533173	0.986021
ENSOCUT00000001249	ENSOCUG00000001250	EDNRA	endothelin receptor type A	ProteinCodingRNA	11.5615	11.6368	11.6835	11.8223	11.0834	12.3174	11.6273	11.7411	0.113763	0.503325	0.986021
ENSOCUT00000027648	ENSOCUG00000029269	---	---	ProteinCodingRNA	0.883565	0	0	0	0	1.01405	0.294522	0.338016	0.0434945	0.992719	0.999819
ENSOCUT00000004184	ENSOCUG00000004180	FGGY	FGGY carbohydrate kinase domain containing	ProteinCodingRNA	7.9914	8.03271	7.90235	7.73926	8.15683	8.01654	7.97549	7.97088	-0.00461186	0.982879	0.999819
ENSOCUT00000011174	ENSOCUG00000011174	---	---	ProteinCodingRNA	0	0	0	0	1.59655	2.6083	0	1.40162	1.40162	0.214711	0.946488
MSTRG.13997.1	---	---	---	Predicted_LncRNA	10.4215	9.99505	10.1019	9.79839	10.5555	10.6933	10.1728	10.3491	0.176236	0.414305	0.986021
ENSOCUT00000032886	ENSOCUG00000028891	RF00582	small Cajal body-specific RNA 14	OtherNonCodingRNA	2.6016	1.99947	2.45817	2.99215	2.33582	1.01405	2.35308	2.11401	-0.239073	0.947811	0.999819
ENSOCUT00000007220	ENSOCUG00000007220	---	---	ProteinCodingRNA	11.3532	11.3884	11.2059	11.3812	11.2923	11.1174	11.3158	11.2636	-0.052175	0.658494	0.986021
ENSOCUT00000028360	ENSOCUG00000025995	ASB2	ankyrin repeat and SOCS box containing 2	ProteinCodingRNA	3.94146	3.80669	3.6133	3.79902	3.18535	4.72734	3.78715	3.9039	0.116752	0.66308	0.986021
ENSOCUT00000028361	ENSOCUG00000025752	---	---	ProteinCodingRNA	7.56544	6.02167	6.88112	6.45056	7.29335	6.56682	6.82274	6.77025	-0.0524955	0.76483	0.986021
ENSOCUT00000010469	ENSOCUG00000010468	CSTF2	cleavage stimulation factor subunit 2	ProteinCodingRNA	9.8353	9.48713	9.38729	9.93502	9.02012	9.12067	9.5699	9.3586	-0.211303	0.569169	0.986021
ENSOCUT00000028365	ENSOCUG00000027134	---	---	ProteinCodingRNA	9.60425	9.45872	9.53883	9.41521	9.45611	9.37443	9.53393	9.41525	-0.118685	0.209731	0.939793
ENSOCUT00000001940	ENSOCUG00000001941	XRCC2	X-ray repair cross complementing 2	ProteinCodingRNA	6.97785	6.35685	5.80906	6.49892	6.01707	5.64211	6.38125	6.0527	-0.328553	0.368909	0.986021
ENSOCUT00000028368	ENSOCUG00000026171	TMEM253	transmembrane protein 253	ProteinCodingRNA	2.6016	1.58449	2.45817	0.99552	4.60158	3.72627	2.21475	3.10779	0.893039	0.135873	0.866024
ENSOCUT00000028369	ENSOCUG00000023913	---	---	ProteinCodingRNA	4.09201	5.12859	6.21037	4.51498	4.54015	5.0271	5.14366	4.69408	-0.449581	0.260955	0.970468
ENSOCUT00000011002	ENSOCUG00000011004	HAUS2	HAUS augmin like complex subunit 2	ProteinCodingRNA	7.044	6.90618	6.6095	7.22949	6.37468	6.87321	6.85323	6.82579	-0.0274344	0.998102	0.999819
ENSOCUT00000012111	ENSOCUG00000012103	FAT2	FAT atypical cadherin 2	ProteinCodingRNA	14.0846	14.1405	14.366	14.2881	13.7787	13.632	14.197	13.8996	-0.297428	0.202254	0.937932
ENSOCUT00000012112	ENSOCUG00000012114	---	---	OtherNonCodingRNA	6.68981	7.09732	7.1329	7.15096	6.9714	6.50338	6.97334	6.87525	-0.0980966	0.75505	0.986021
ENSOCUT00000000046	ENSOCUG00000000046	---	---	ProteinCodingRNA	0	0	0	2.31475	0	0	0	0.771584	0.771584	0.469318	0.986021
ENSOCUT00000012114	ENSOCUG00000012116	OVOL2	ovo like zinc finger 2	ProteinCodingRNA	5.25463	4.9062	5.71959	5.27666	4.77159	4.27443	5.29347	4.77423	-0.519247	0.245336	0.964492
ENSOCUT00000012115	ENSOCUG00000012115	AXIN2	axin 2	ProteinCodingRNA	10.1569	10.1503	10.1484	10.2776	9.35047	9.65364	10.1519	9.76057	-0.391296	0.173675	0.911068
ENSOCUT00000012116	ENSOCUG00000012118	GPR88	G protein-coupled receptor 88	ProteinCodingRNA	3.47757	2.58437	2.45817	0	2.82223	2.6083	2.84004	1.81018	-1.02986	0.453463	0.986021
ENSOCUT00000012119	ENSOCUG00000012120	SPARC	secreted protein acidic and cysteine rich	ProteinCodingRNA	16.7121	17.1812	17.3778	16.7597	14.3745	16.8048	17.0904	15.9797	-1.11069	0.171709	0.910728
MSTRG.10308.1	---	---	---	Predicted_LncRNA	7.55899	8.05999	8.05036	8.37907	8.57188	8.88588	7.88978	8.61228	0.722502	0.00148494	0.117099
MSTRG.458.1	---	---	---	Predicted_LncRNA	4.0187	5.39162	5.83769	5.69164	1.59655	4.34851	5.08267	3.8789	-1.20377	0.512706	0.986021
ENSOCUT00000002194	ENSOCUG00000002194	VPS53	VPS53, GARP complex subunit	ProteinCodingRNA	8.52569	9.35684	6.31589	9.35517	6.10455	8.06678	8.06614	7.84217	-0.223976	0.887164	0.995584
MSTRG.7935.1	---	---	---	Predicted_LncRNA	4.85213	4.08679	3.96434	3.99159	4.47599	4.1138	4.30109	4.19379	-0.107299	0.726321	0.986021
ENSOCUT00000002196	ENSOCUG00000002192	PGAP1	post-GPI attachment to proteins 1	ProteinCodingRNA	9.55162	9.56534	9.14821	9.54563	8.62463	8.61661	9.42172	8.92895	-0.492771	0.147546	0.881555
MSTRG.10826.1	---	---	---	Predicted_LncRNA	0	1.99947	0	1.57899	4.47599	0	0.666488	2.01832	1.35184	0.188876	0.922687
MSTRG.19053.1	---	---	---	Predicted_LncRNA	7.82398	7.9418	7.78229	7.97406	8.38797	7.71433	7.84936	8.02545	0.176096	0.364368	0.986021
MSTRG.5723.3	---	---	---	Predicted_LncRNA	1.82162	0	0	0	4.40884	7.59767	0.607208	4.00217	3.39496	0.0464161	0.625331
ENSOCUT00000012555	ENSOCUG00000012542	CACNA2D3	calcium voltage-gated channel auxiliary subunit alpha2delta 3	ProteinCodingRNA	8.24949	7.80019	7.48027	8.21506	6.87517	6.6859	7.84332	7.25871	-0.584607	0.328795	0.986021
ENSOCUT00000029636	ENSOCUG00000027144	---	---	ProteinCodingRNA	0	0	0	1.57899	0	2.02102	0	1.2	1.2	0.320145	0.986021
ENSOCUT00000019819	ENSOCUG00000019819	RF00026	---	OtherNonCodingRNA	4.22832	3.58431	4.40793	3.79902	3.4752	3.83334	4.07352	3.70252	-0.370996	0.400605	0.986021
ENSOCUT00000032888	ENSOCUG00000028893	RF00100	---	OtherNonCodingRNA	0	1.58449	0	0	0	0	0.528162	0	-0.528162	0.648025	0.986021
ENSOCUT00000020081	ENSOCUG00000020081	RF00614	---	OtherNonCodingRNA	2.78963	1.58449	2.72661	3.16195	2.33582	2.6083	2.36691	2.70202	0.335114	0.691119	0.986021
ENSOCUT00000031455	ENSOCUG00000023717	CNKSR1	connector enhancer of kinase suppressor of Ras 1	ProteinCodingRNA	9.39748	9.03546	9.0659	9.51067	9.00883	8.54752	9.16628	9.02234	-0.143938	0.712638	0.986021
ENSOCUT00000020085	ENSOCUG00000020085	RF00613	small nucleolar RNA, C/D box 94	OtherNonCodingRNA	5.25463	5.28471	6.3361	5.1612	6.86268	6.59753	5.62515	6.20714	0.58199	0.2259	0.951724
ENSOCUT00000006546	ENSOCUG00000006548	ECHDC1	ethylmalonyl-CoA decarboxylase 1	ProteinCodingRNA	10.1865	10.3178	10.1253	10.2247	10.3085	10.8632	10.2099	10.4655	0.255566	0.163944	0.902245
ENSOCUT00000016356	ENSOCUG00000016354	IL6R	interleukin 6 receptor	ProteinCodingRNA	9.84328	10.3678	10.8504	9.96545	10.8231	10.4363	10.3538	10.4083	0.0544374	0.9018	0.998442
ENSOCUT00000016357	ENSOCUG00000016359	ALKBH3	alkB homolog 3, alpha-ketoglutaratedependent dioxygenase	ProteinCodingRNA	7.46553	7.70665	7.68322	7.68456	7.77215	7.74893	7.61846	7.73521	0.116746	0.451717	0.986021
ENSOCUT00000016352	ENSOCUG00000016348	KCNH8	potassium voltage-gated channel subfamily H member 8	ProteinCodingRNA	0	0	0	2.57749	2.01302	2.02102	0	2.20384	2.20384	0.0159667	0.402411
ENSOCUT00000022832	ENSOCUG00000022201	---	---	ProteinCodingRNA	5.31711	4.16925	0	6.63497	3.92308	4.48613	3.16212	5.01473	1.85261	0.31874	0.986021
ENSOCUT00000011547	ENSOCUG00000011553	NUS1	NUS1 dehydrodolichyl diphosphate synthase subunit	ProteinCodingRNA	9.3309	8.89411	8.77901	9.09695	9.10212	8.74214	9.00134	8.9804	-0.0209331	0.874036	0.993072
ENSOCUT00000016933	ENSOCUG00000016936	MMRN2	multimerin 2	ProteinCodingRNA	9.05653	9.53456	9.53883	8.6421	9.6357	9.79611	9.37664	9.35797	-0.0186699	0.88432	0.994832
ENSOCUT00000011544	ENSOCUG00000011548	MYOG	myogenin	ProteinCodingRNA	2.78963	0	0	0	0	2.02102	0.929875	0.673674	-0.256201	0.764455	0.986021
ENSOCUT00000016358	ENSOCUG00000016358	WDTC1	WD and tetratricopeptide repeats 1	ProteinCodingRNA	10.7822	10.9586	10.7238	10.9328	10.49	10.6129	10.8215	10.6786	-0.142942	0.392929	0.986021
MSTRG.18532.3	---	---	---	Predicted_LncRNA	10.5474	10.614	10.5498	10.9372	11.3858	11.0758	10.5704	11.1329	0.562531	8.37681e-05	0.0172825
MSTRG.2514.1	---	---	---	Predicted_LncRNA	7.53946	6.78065	6.41422	7.33981	4.54015	5.19712	6.91145	5.69236	-1.21909	0.281767	0.979983
ENSOCUT00000022951	ENSOCUG00000015135	WDSUB1	WD repeat, sterile alpha motif and U-box domain containing 1	ProteinCodingRNA	8.62783	8.24722	8.12775	8.22468	8.19221	8.19277	8.33427	8.20322	-0.131049	0.410345	0.986021
ENSOCUT00000025670	ENSOCUG00000023638	KCNIP3	potassium voltage-gated channel interacting protein 3	ProteinCodingRNA	5.48981	5.58426	5.68849	4.45087	5.26481	4.93393	5.58752	4.8832	-0.704318	0.0483534	0.635979
ENSOCUT00000025677	ENSOCUG00000027535	PEG10	paternally expressed 10	ProteinCodingRNA	6.54067	5.12859	5.89331	5.63506	6.20693	6.58226	5.85419	6.14142	0.287228	0.629123	0.986021
ENSOCUT00000022956	ENSOCUG00000027484	PPP1R3E	protein phosphatase 1 regulatory subunit 3E	ProteinCodingRNA	1.42753	1.99947	2.72661	2.57749	2.82223	3.72627	2.0512	3.042	0.990793	0.170925	0.909815
ENSOCUT00000012627	ENSOCUG00000012629	CLDN2	claudin 2	ProteinCodingRNA	1.82162	2.58437	2.45817	3.31385	4.60158	4.61177	2.28805	4.17574	1.88768	0.00233942	0.153734
ENSOCUT00000014790	ENSOCUG00000014786	INO80D	INO80 complex subunit D	ProteinCodingRNA	11.0349	11.1617	11.3923	11.1944	11.28	11.0947	11.1963	11.1897	-0.0065914	0.929189	0.999819
ENSOCUT00000022959	ENSOCUG00000024510	---	---	ProteinCodingRNA	5.69197	5.45873	5.99849	5.4175	6.03944	6.47059	5.7164	5.97584	0.259445	0.407385	0.986021
ENSOCUT00000022958	ENSOCUG00000023442	ZNRF1	zinc and ring finger 1	ProteinCodingRNA	7.19306	7.5992	7.1444	7.07856	7.64661	7.57471	7.31222	7.43329	0.121068	0.611209	0.986021
MSTRG.9120.1	---	---	---	Predicted_LncRNA	9.77118	9.83059	9.99158	10.0612	9.87375	9.63711	9.86445	9.85734	-0.00711498	0.994902	0.999819
ENSOCUT00000011543	ENSOCUG00000011543	SKOR1	SKI family transcriptional corepressor 1	ProteinCodingRNA	0	1.58449	2.1281	2.99215	2.33582	2.02102	1.23753	2.44966	1.21214	0.233403	0.953868
ENSOCUT00000026063	ENSOCUG00000004688	PKHD1L1	PKHD1 like 1	ProteinCodingRNA	10.1969	10.9844	10.8791	9.43191	11.9325	11.8469	10.6868	11.0704	0.383624	0.332286	0.986021
ENSOCUT00000026062	ENSOCUG00000013534	ENPP2	ectonucleotide pyrophosphatase/phosphodiesterase 2	ProteinCodingRNA	11.0138	11.5011	11.054	11.2683	11.1709	11.126	11.1896	11.1884	-0.00124985	0.91664	0.999819
ENSOCUT00000012625	ENSOCUG00000012626	TMPRSS11A	transmembrane serine protease 11A	ProteinCodingRNA	3.36376	2.32136	1.08665	2.57749	1.0087	2.02102	2.25726	1.86907	-0.388188	0.541892	0.986021
ENSOCUT00000011540	ENSOCUG00000011541	ILDR1	immunoglobulin like domain containing receptor 1	ProteinCodingRNA	9.49023	8.47096	7.51614	9.2971	6.03944	4.98127	8.49244	6.7726	-1.71984	0.528494	0.986021
ENSOCUT00000029705	ENSOCUG00000010987	TMEM26	transmembrane protein 26	ProteinCodingRNA	6.28334	6.55388	8.00058	7.34863	5.57156	7.68604	6.94593	6.86874	-0.0771904	0.953733	0.999819
ENSOCUT00000004581	ENSOCUG00000004576	ANKIB1	ankyrin repeat and IBR domain containing 1	ProteinCodingRNA	11.9127	11.8143	11.8189	12.0186	11.7465	11.7118	11.8486	11.8256	-0.0229976	0.88625	0.99549
ENSOCUT00000014840	ENSOCUG00000014833	PLA2R1	secretory phospholipase A2 receptor precursor	ProteinCodingRNA	11.2889	11.58	11.3965	11.518	12.3432	12.7052	11.4218	12.1888	0.767014	0.00433444	0.212948
ENSOCUT00000014841	ENSOCUG00000014846	DPYSL5	dihydropyrimidinase like 5	ProteinCodingRNA	0	3.80669	5.33389	3.79902	3.60086	4.88499	3.04686	4.09496	1.0481	0.990533	0.999819
ENSOCUT00000026069	ENSOCUG00000021982	---	---	ProteinCodingRNA	6.54067	5.69974	4.8627	5.99117	1.59655	3.48487	5.70104	3.69086	-2.01017	0.247194	0.966345
ENSOCUT00000026068	ENSOCUG00000024325	RF00001	---	OtherNonCodingRNA	0	0.999643	0	0	1.0087	1.01405	0.333214	0.674248	0.341034	0.746055	0.986021
ENSOCUT00000014844	ENSOCUG00000014842	SOX30	SRY-box 30	ProteinCodingRNA	2.13084	0	0	0	2.01302	0	0.710279	0.671008	-0.0392711	0.958094	0.999819
ENSOCUT00000014845	ENSOCUG00000014847	GTPBP10	GTP binding protein 10	ProteinCodingRNA	8.31984	8.29391	7.96857	8.30847	7.97147	7.82874	8.19411	8.03622	-0.157886	0.448486	0.986021
ENSOCUT00000021281	ENSOCUG00000022947	FCER1A	Fc fragment of IgE receptor Ia	ProteinCodingRNA	7.55251	8.58049	8.43466	7.76585	7.43509	8.36327	8.18922	7.85474	-0.334482	0.339803	0.986021
ENSOCUT00000015008	ENSOCUG00000015007	SPNS3	sphingolipid transporter 3 (putative)	ProteinCodingRNA	3.24021	1.99947	3.47433	3.69216	2.01302	3.83334	2.90467	3.17951	0.274838	0.641354	0.986021
ENSOCUT00000023269	ENSOCUG00000017565	KCP	kielin/chordin-like protein	ProteinCodingRNA	6.666	6.30308	7.025	6.93361	4.77159	4.27443	6.66469	5.32654	-1.33815	0.207116	0.938709
MSTRG.15378.1	---	---	---	Predicted_LncRNA	0	2.58437	1.08665	4.16145	0	0	1.22367	1.38715	0.163478	0.545515	0.986021
ENSOCUT00000012621	ENSOCUG00000012614	TXNDC16	thioredoxin domain containing 16	ProteinCodingRNA	5.6682	6.30308	6.43311	6.01353	5.4432	5.67126	6.13479	5.70933	-0.425461	0.192256	0.927459
ENSOCUT00000010015	ENSOCUG00000010011	LMNA	lamin A/C	ProteinCodingRNA	10.9118	13.5595	11.1921	11.2198	13.2371	13.5697	11.8878	12.6755	0.78774	0.573627	0.986021
ENSOCUT00000028419	ENSOCUG00000001636	---	---	ProteinCodingRNA	9.46458	9.26138	9.17931	9.42149	9.21453	9.43731	9.30176	9.35778	0.0560213	0.69924	0.986021
ENSOCUT00000020882	ENSOCUG00000020882	RF00001	---	OtherNonCodingRNA	1.42753	1.58449	2.1281	1.57899	2.01302	2.02102	1.71337	1.87101	0.15764	0.840954	0.988804
ENSOCUT00000020881	ENSOCUG00000020881	RF00001	---	OtherNonCodingRNA	0	0.999643	0	0	1.0087	1.01405	0.333214	0.674248	0.341034	0.746055	0.986021
MSTRG.7400.1	---	---	---	Predicted_LncRNA	8.91976	9.06268	8.67177	9.07319	8.67907	8.91969	8.88474	8.89065	0.00591362	0.976509	0.999819
ENSOCUT00000020887	ENSOCUG00000020887	---	---	OtherNonCodingRNA	3.24021	2.99938	2.95286	3.31385	3.4752	3.72627	3.06415	3.50511	0.440963	0.409876	0.986021
ENSOCUT00000019764	ENSOCUG00000019764	RF00003	---	OtherNonCodingRNA	0	0.999643	0	0.99552	1.0087	0	0.333214	0.668072	0.334857	0.749845	0.986021
ENSOCUT00000020885	ENSOCUG00000020885	RF00026	---	OtherNonCodingRNA	0	0	0	0	1.0087	0	0	0.336232	0.336232	0.80659	0.986021
MSTRG.12625.1	---	---	---	Predicted_LncRNA	10.7069	11.5316	11.2451	11.4257	10.9853	10.6673	11.1612	11.0261	-0.135138	0.613564	0.986021
ENSOCUT00000001246	ENSOCUG00000001246	TMCC2	transmembrane and coiled-coil domain family 2	ProteinCodingRNA	7.43767	7.95349	7.65936	7.87371	8.72466	7.94074	7.68351	8.1797	0.496195	0.0761125	0.737087
ENSOCUT00000019406	ENSOCUG00000019406	RF00093	small nucleolar RNA, C/D box 18A	OtherNonCodingRNA	3.94146	3.58431	4.15842	4.16145	4.33841	3.72627	3.89473	4.07538	0.180645	0.680506	0.986021
ENSOCUT00000022483	ENSOCUG00000023928	---	---	ProteinCodingRNA	10.9846	10.7961	10.2781	11.1274	7.97727	8.3498	10.6863	9.15149	-1.53479	0.383859	0.986021
ENSOCUT00000022482	ENSOCUG00000008073	POLR3E	RNA polymerase III subunit E	ProteinCodingRNA	10.4242	10.2063	10.1224	10.2948	10.1898	10.1928	10.251	10.2258	-0.0251634	0.794929	0.986021
ENSOCUT00000022488	ENSOCUG00000025022	NUPR1	nuclear protein 1, transcriptional regulator	ProteinCodingRNA	6.5537	6.94181	7.39615	6.48298	6.52494	6.61264	6.96388	6.54019	-0.423698	0.105426	0.803746
ENSOCUT00000029566	ENSOCUG00000026059	---	---	ProteinCodingRNA	4.76515	3.32129	3.74004	2.99215	3.33754	3.48487	3.94216	3.27152	-0.670638	0.180931	0.914954
ENSOCUT00000029565	ENSOCUG00000022291	---	---	ProteinCodingRNA	8.24949	8.9241	8.93951	8.4089	8.7038	9.38547	8.70437	8.83273	0.128357	0.629881	0.986021
ENSOCUT00000026391	ENSOCUG00000005804	RBL1	RB transcriptional corepressor like 1	ProteinCodingRNA	5.73838	5.12859	6.27461	5.77255	5.66085	4.41896	5.71386	5.28412	-0.429738	0.438859	0.986021
ENSOCUT00000029562	ENSOCUG00000021861	---	---	ProteinCodingRNA	0.883565	1.99947	2.45817	2.57749	3.60086	2.6083	1.7804	2.92888	1.14848	0.148068	0.8819
ENSOCUT00000029560	ENSOCUG00000027318	WDR53	WD repeat domain 53	ProteinCodingRNA	8.88923	8.95639	8.71099	8.85213	8.83748	8.78612	8.8522	8.82524	-0.0269599	0.79169	0.986021
ENSOCUT00000004182	ENSOCUG00000004177	ZSWIM5	zinc finger SWIM-type containing 5	ProteinCodingRNA	7.09839	6.91816	7.23329	6.73258	7.86275	7.62028	7.08328	7.4052	0.321925	0.237185	0.958409
ENSOCUT00000026398	ENSOCUG00000026028	---	---	ProteinCodingRNA	8.88666	8.26138	8.34775	8.46678	8.56419	8.80598	8.4986	8.61232	0.11372	0.686873	0.986021
ENSOCUT00000029568	ENSOCUG00000025551	---	---	ProteinCodingRNA	6.38893	6.18912	5.48634	6.2006	6.98299	6.78259	6.02146	6.65539	0.633931	0.0848181	0.756616
ENSOCUT00000003116	ENSOCUG00000003120	OPRK1	opioid receptor kappa 1	ProteinCodingRNA	0	3.16929	0	4.23943	2.82223	4.55032	1.05643	3.87066	2.81423	0.0766349	0.737087
ENSOCUT00000006477	ENSOCUG00000006462	---	---	ProteinCodingRNA	7.62222	7.55388	8.05036	6.92184	8.40531	8.4159	7.74215	7.91435	0.172193	0.465678	0.986021
MSTRG.15889.1	---	---	---	Predicted_LncRNA	6.97785	6.52286	5.83769	6.79846	6.2839	6.1975	6.44613	6.42662	-0.0195099	0.846572	0.989085
ENSOCUT00000006475	ENSOCUG00000006471	BEND5	BEN domain containing 5	ProteinCodingRNA	7.45861	7.81307	7.73741	7.27649	6.66102	7.09384	7.6697	7.01045	-0.659246	0.00635328	0.263659
ENSOCUT00000003112	ENSOCUG00000003105	DZIP3	DAZ interacting zinc finger protein 3	ProteinCodingRNA	10.5086	10.5355	10.6671	10.5919	10.5122	10.432	10.5704	10.512	-0.0583949	0.548304	0.986021
MSTRG.18485.1	---	---	---	Predicted_LncRNA	9.38295	9.22811	9.14535	9.49288	9.54088	9.39205	9.25213	9.47527	0.223135	0.0608169	0.687747
ENSOCUT00000003110	ENSOCUG00000003108	TMEM44	transmembrane protein 44	ProteinCodingRNA	7.06236	6.79371	6.524	6.89799	5.71745	6.0499	6.79336	6.22178	-0.571574	0.18718	0.920821
ENSOCUT00000021470	ENSOCUG00000025645	---	---	ProteinCodingRNA	7.11607	6.91816	6.96137	6.97978	6.8116	6.58226	6.99853	6.79121	-0.207319	0.323709	0.986021
MSTRG.1135.1	---	---	---	Predicted_LncRNA	8.57127	8.81947	8.82263	8.77568	9.05623	8.62408	8.73779	8.81866	0.0808733	0.606532	0.986021
MSTRG.10012.1	---	---	---	Predicted_LncRNA	6.94854	7.6575	6.50627	7.26721	6.73142	7.17751	7.03744	7.05871	0.0212764	0.909921	0.999819
ENSOCUT00000003118	ENSOCUG00000003119	---	---	ProteinCodingRNA	9.00051	9.03546	8.74162	9.05982	8.99459	8.78945	8.92586	8.94795	0.0220881	0.895491	0.997619
ENSOCUT00000003119	ENSOCUG00000003112	STRC	stereocilin precursor	ProteinCodingRNA	6.83568	6.50709	6.48833	6.18097	6.58701	6.82213	6.61036	6.53004	-0.080326	0.794206	0.986021
ENSOCUT00000015461	ENSOCUG00000015461	CAAP1	caspase activity and apoptosis inhibitor 1	ProteinCodingRNA	8.81268	8.89411	8.95593	9.06786	8.73154	8.80269	8.88757	8.86736	-0.0202099	0.928344	0.999819
ENSOCUT00000023194	ENSOCUG00000022398	RF00026	---	OtherNonCodingRNA	3.47757	3.16929	2.72661	3.16195	2.82223	1.60366	3.12449	2.52928	-0.595209	0.461854	0.986021
ENSOCUT00000015462	ENSOCUG00000015431	DOCK10	dedicator of cytokinesis 10	ProteinCodingRNA	9.42611	10.1903	10.4981	9.30165	9.90149	10.3767	10.0382	9.85994	-0.178235	0.615103	0.986021
ENSOCUT00000015465	ENSOCUG00000015468	---	---	OtherNonCodingRNA	4.89373	4.95351	4.32946	3.79902	4.77159	4.61177	4.72556	4.39413	-0.331436	0.48759	0.986021
ENSOCUT00000015464	ENSOCUG00000015466	---	---	ProteinCodingRNA	7.13354	7.45872	7.51614	7.26721	7.18714	7.38535	7.36947	7.2799	-0.0895664	0.627618	0.986021
ENSOCUT00000015467	ENSOCUG00000015469	CTSO	cathepsin O	ProteinCodingRNA	7.09839	7.41714	7.81865	7.42571	7.22668	7.39412	7.44473	7.34883	-0.0958925	0.625133	0.986021
ENSOCUT00000024891	ENSOCUG00000022127	KBTBD13	kelch repeat and BTB domain containing 13	ProteinCodingRNA	0	0	0	0	2.01302	0	0	0.671008	0.671008	0.533908	0.986021
ENSOCUT00000015468	ENSOCUG00000015473	XKR6	XK related 6	ProteinCodingRNA	0	4.58428	1.69938	3.99159	1.59655	0	2.09455	1.86271	-0.23184	0.768955	0.986021
ENSOCUT00000004183	ENSOCUG00000004184	SLC39A8	solute carrier family 39 member 8	ProteinCodingRNA	12.8553	12.1758	11.2814	12.8727	9.61351	10.0764	12.1042	10.8542	-1.24994	0.5429	0.986021
ENSOCUT00000022103	ENSOCUG00000026636	MYH1	myosin-4	ProteinCodingRNA	6.62953	6.64315	1.69938	2.31475	2.01302	2.02102	4.99068	2.11627	-2.87442	0.000130823	0.0241791
MSTRG.470.1	---	---	---	Predicted_LncRNA	9.14531	8.588	9.26613	7.87981	10.6773	10.3822	8.99982	9.64644	0.646625	0.0776281	0.738133
ENSOCUT00000021477	ENSOCUG00000012627	GPR137C	G protein-coupled receptor 137C	ProteinCodingRNA	2.6016	0	0	2.57749	2.59943	4.27443	0.867198	3.15045	2.28325	0.100176	0.796525
ENSOCUT00000032260	ENSOCUG00000028265	RF00231	---	OtherNonCodingRNA	1.42753	0.999643	1.69938	0	1.0087	2.6083	1.37552	1.20567	-0.16985	0.844578	0.989085
ENSOCUT00000003678	ENSOCUG00000003679	---	Glutathione S-transferase alpha I Glutathione S-transferase alpha I, N-terminally processed	ProteinCodingRNA	10.9834	11.7978	11.6796	10.6466	11.7182	11.8844	11.4869	11.4164	-0.0705415	0.958943	0.999819
ENSOCUT00000027851	ENSOCUG00000002725	SPATA20	spermatogenesis associated 20	ProteinCodingRNA	6.59211	6.40869	6.57591	6.69155	7.32101	7.18764	6.52557	7.06673	0.541166	0.023767	0.474885
ENSOCUT00000000134	ENSOCUG00000000133	NFKBIZ	NFKB inhibitor zeta	ProteinCodingRNA	10.1569	11.9126	11.8988	11.4718	11.5531	11.8195	11.3228	11.6148	0.292056	0.808254	0.986021
ENSOCUT00000000137	ENSOCUG00000000137	CCT3	chaperonin containing TCP1 subunit 3	ProteinCodingRNA	12.1257	11.9954	11.8636	12.1158	11.9377	12.0092	11.9949	12.0209	0.0259811	0.83202	0.987519
MSTRG.17824.1	---	---	---	Predicted_LncRNA	5.34737	4.39164	2.72661	2.57749	4.87473	4.19635	4.15521	3.88285	-0.272354	0.66915	0.986021
ENSOCUT00000000131	ENSOCUG00000000131	NXPE3	neurexophilin and PC-esterase domain family member 3	ProteinCodingRNA	8.05237	8.46689	8.7454	7.76585	8.17715	8.68611	8.42155	8.2097	-0.21185	0.53477	0.986021
ENSOCUT00000032262	ENSOCUG00000028267	RF00004	---	OtherNonCodingRNA	0	0	1.08665	0	0	0	0.362216	0	-0.362216	0.820752	0.986021
ENSOCUT00000006171	ENSOCUG00000006173	---	---	ProteinCodingRNA	7.01602	7.49914	7.07395	7.39196	6.85008	6.56682	7.19637	6.93629	-0.260083	0.433354	0.986021
ENSOCUT00000021750	ENSOCUG00000026185	RBM43	RNA binding motif protein 43	ProteinCodingRNA	6.10002	6.02167	6.27461	6.48298	6.03944	6.31301	6.1321	6.27848	0.146381	0.524095	0.986021
ENSOCUT00000021023	ENSOCUG00000027076	---	---	ProteinCodingRNA	0	0	0	0	1.59655	1.60366	0	1.06674	1.06674	0.399462	0.986021
ENSOCUT00000006698	ENSOCUG00000006699	NTAN1	N-terminal asparagine amidase	ProteinCodingRNA	9.33656	9.63953	9.56903	9.22466	9.75372	9.93182	9.51504	9.63673	0.12169	0.500525	0.986021
ENSOCUT00000021026	ENSOCUG00000010035	---	---	ProteinCodingRNA	9.61206	9.74244	9.79207	9.60206	9.87063	9.62412	9.71552	9.69894	-0.0165845	0.921438	0.999819
ENSOCUT00000024507	ENSOCUG00000021491	GPANK1	G-patch domain and ankyrin repeats 1	ProteinCodingRNA	8.23742	8.04368	8.33776	8.31298	7.91813	8.25669	8.20629	8.1626	-0.0436875	0.832343	0.987519
ENSOCUT00000021025	ENSOCUG00000027784	---	---	OtherNonCodingRNA	1.82162	1.99947	0	0	1.59655	2.02102	1.2737	1.20586	-0.0678403	0.931845	0.999819
ENSOCUT00000006692	ENSOCUG00000006695	LARK	RNA-binding protein 4	ProteinCodingRNA	10.079	10.1541	10.4102	10.2066	10.3738	10.1966	10.2145	10.259	0.0445246	0.76044	0.986021
ENSOCUT00000006693	ENSOCUG00000006691	GSDME	gasdermin E	ProteinCodingRNA	7.3129	7.5992	7.91584	7.49887	7.11525	7.43719	7.60931	7.35044	-0.258879	0.258963	0.970468
ENSOCUT00000006690	ENSOCUG00000006688	---	---	ProteinCodingRNA	10.7221	10.8242	9.90798	10.7375	10.8447	10.8813	10.4848	10.8212	0.336383	0.256747	0.969868
ENSOCUT00000021029	ENSOCUG00000010493	GRAMD1B	GRAM domain containing 1B	ProteinCodingRNA	8.03388	7.95349	8.06254	8.76912	7.27461	7.85439	8.01663	7.96604	-0.050592	0.830137	0.986916
ENSOCUT00000006696	ENSOCUG00000006698	TNLG1F	Tumor necrosis factor Tumor necrosis factor, membrane form Intracellular domain 1 Intracellular domain 2 C-domain 1 C-domain 2 Tumor necrosis factor, soluble form	ProteinCodingRNA	4.57368	5.58426	6.69022	6.36617	5.33884	4.83433	5.61606	5.51311	-0.102943	0.754672	0.986021
ENSOCUT00000006694	ENSOCUG00000006696	---	---	OtherNonCodingRNA	0	0	0	0	2.01302	0	0	0.671008	0.671008	0.533908	0.986021
ENSOCUT00000006695	ENSOCUG00000006701	METTL22	methyltransferase like 22	ProteinCodingRNA	8.84485	8.61031	8.57306	8.43814	8.63568	8.43302	8.67607	8.50228	-0.173795	0.225364	0.951724
ENSOCUT00000023536	ENSOCUG00000022744	KCNU1	potassium calcium-activated channel subfamily U member 1	ProteinCodingRNA	5.64403	5.12859	5.33389	5.4175	3.82346	4.98127	5.36884	4.74074	-0.628093	0.294049	0.980264
ENSOCUT00000004831	ENSOCUG00000004833	---	---	ProteinCodingRNA	10.6609	10.5423	10.2343	10.6537	10.5082	10.45	10.4792	10.5373	0.0581053	0.743181	0.986021
ENSOCUT00000004832	ENSOCUG00000004834	F3	Tissue factor	ProteinCodingRNA	12.244	13.0196	13.6432	12.647	13.0593	12.6323	12.9689	12.7795	-0.189401	0.410945	0.986021
ENSOCUT00000031194	ENSOCUG00000027579	RF00561	---	OtherNonCodingRNA	0	0	0	0	1.0087	0	0	0.336232	0.336232	0.80659	0.986021
ENSOCUT00000004834	ENSOCUG00000004832	USP47	ubiquitin specific peptidase 47	ProteinCodingRNA	12.1336	11.9826	11.9485	12.0768	12.0247	11.9602	12.0216	12.0206	-0.00100428	0.975427	0.999819
ENSOCUT00000004835	ENSOCUG00000004831	DIP2A	disco interacting protein 2 homolog A	ProteinCodingRNA	12.5399	12.7002	12.8185	12.5185	12.6117	12.7193	12.6862	12.6165	-0.0697277	0.543772	0.986021
ENSOCUT00000023538	ENSOCUG00000025564	PROCA1	protein interacting with cyclin A1	ProteinCodingRNA	6.13513	6.47503	6.21037	6.29492	6.4434	6.8857	6.27351	6.54134	0.267834	0.291939	0.980264
ENSOCUT00000023539	ENSOCUG00000027972	CDKN2A	cyclin dependent kinase inhibitor 2A	ProteinCodingRNA	0	3.16929	2.1281	0	1.59655	0	1.7658	0.532182	-1.23361	0.266202	0.970543
ENSOCUT00000015076	ENSOCUG00000015071	ALDH1L1	aldehyde dehydrogenase 1 family member L1	ProteinCodingRNA	6.81417	6.97657	6.82502	5.79854	6.24593	6.11502	6.87192	6.05316	-0.818761	0.000354943	0.0482652
ENSOCUT00000015077	ENSOCUG00000015083	CNPPD1	cyclin Pas1/PHO80 domain containing 1	ProteinCodingRNA	10.5876	10.2777	10.1484	10.4869	10.2231	10.1154	10.3379	10.2751	-0.0627546	0.70137	0.986021
ENSOCUT00000015072	ENSOCUG00000015076	FXN	frataxin	ProteinCodingRNA	8.05695	8.14395	7.95557	7.9277	7.47667	7.62028	8.05216	7.67488	-0.377273	0.0438875	0.613287
ENSOCUT00000009877	ENSOCUG00000009880	DUSP14	dual specificity phosphatase 14	ProteinCodingRNA	10.8642	11.0189	10.1369	11.3903	9.75372	10.1074	10.6733	10.4171	-0.256187	0.779849	0.986021
ENSOCUT00000009875	ENSOCUG00000009878	XIAP	---	ProteinCodingRNA	10.6443	10.4171	10.2249	10.4319	10.2759	10.1141	10.4288	10.274	-0.154804	0.315714	0.986021
ENSOCUT00000005988	ENSOCUG00000005990	FAM198A	family with sequence similarity 198 member A	ProteinCodingRNA	8.3045	8.55388	9.23418	8.21506	8.84385	9.37886	8.69752	8.81259	0.115068	0.70899	0.986021
ENSOCUT00000009873	ENSOCUG00000009864	SNRNP200	small nuclear ribonucleoprotein U5 subunit 200	ProteinCodingRNA	13.6565	13.6105	13.6121	13.718	13.6622	13.5782	13.6264	13.6528	0.0264411	0.721635	0.986021
ENSOCUT00000009871	ENSOCUG00000009872	TMEM178A	transmembrane protein 178A	ProteinCodingRNA	5.95035	5.75419	4.06464	5.51478	4.66051	5.07152	5.25639	5.08227	-0.174124	0.535632	0.986021
ENSOCUT00000009870	ENSOCUG00000009873	COX6A1	cytochrome c oxidase subunit 6A1, mitochondrial precursor	ProteinCodingRNA	11.3722	11.1717	11.2072	11.3175	10.9591	11.1752	11.2504	11.1506	-0.0997918	0.47665	0.986021
ENSOCUT00000022220	ENSOCUG00000025171	NBR1	NBR1, autophagy cargo receptor	ProteinCodingRNA	3.10507	3.45878	3.85655	10.5166	0	3.34712	3.47347	4.62122	1.14776	0.0212323	0.453941
ENSOCUT00000011639	ENSOCUG00000011641	FBXO15	F-box protein 15	ProteinCodingRNA	5.18931	5.45873	5.06997	4.84932	4.47599	5.0271	5.23934	4.78413	-0.455205	0.190612	0.923284
MSTRG.9774.1	---	---	---	Predicted_LncRNA	10.725	10.6735	10.682	10.9481	11.1021	10.5921	10.6935	10.8808	0.1873	0.195399	0.928972
ENSOCUT00000022227	ENSOCUG00000025952	CELSR3	cadherin EGF LAG seven-pass G-type receptor 3	ProteinCodingRNA	4.97349	3.80669	4.06464	4.51498	4.47599	4.61177	4.28161	4.53425	0.252636	0.751928	0.986021
ENSOCUT00000022229	ENSOCUG00000026538	PHB2	prohibitin 2	ProteinCodingRNA	10.418	10.2882	10.1137	10.4909	9.96861	10.0531	10.2733	10.1709	-0.102405	0.628177	0.986021
ENSOCUT00000007122	ENSOCUG00000007119	SLC5A9	solute carrier family 5 member 9	ProteinCodingRNA	9.3553	9.40017	9.75502	9.39192	10.4809	10.0627	9.50349	9.9785	0.475007	0.0683446	0.712951
MSTRG.7045.1	---	---	---	Predicted_LncRNA	6.71323	7.10782	6.88112	6.97978	7.96564	7.09384	6.90072	7.34642	0.445699	0.128942	0.852495
MSTRG.9746.1	---	---	---	Predicted_LncRNA	3.85986	4.52288	3.14838	3.79902	4.26436	3.72627	3.84371	3.92988	0.0861782	0.991208	0.999819
ENSOCUT00000007126	ENSOCUG00000007124	TTK	TTK protein kinase	ProteinCodingRNA	9.16243	8.39161	7.98786	8.96546	6.47658	6.70012	8.51397	7.38072	-1.13325	0.260864	0.970468
ENSOCUT00000021078	ENSOCUG00000021023	RF00026	---	OtherNonCodingRNA	0.883565	0	0	0	2.01302	1.01405	0.294522	1.00902	0.714503	0.458919	0.986021
ENSOCUT00000008690	ENSOCUG00000008684	NXF3	nuclear RNA export factor 3	ProteinCodingRNA	0.883565	1.99947	2.1281	0	0	0	1.67038	0	-1.67038	0.0900521	0.767162
ENSOCUT00000008691	ENSOCUG00000008690	TMCO4	transmembrane and coiled-coil domains 4	ProteinCodingRNA	9.44547	9.1965	9.45353	9.04903	9.00599	9.2947	9.36517	9.11658	-0.248595	0.0899423	0.767162
ENSOCUT00000008692	ENSOCUG00000008688	CFAP43	cilia and flagella associated protein 43	ProteinCodingRNA	8.0057	8.1642	7.35712	7.49092	7.90601	7.84162	7.84234	7.74618	-0.0961557	0.637985	0.986021
ENSOCUT00000008694	ENSOCUG00000008694	DNAJC12	DnaJ heat shock protein family (Hsp40) member C12	ProteinCodingRNA	9.75575	10.2766	10.9684	9.6984	10.7647	10.6035	10.3336	10.3555	0.0219492	0.985988	0.999819
ENSOCUT00000030270	ENSOCUG00000026943	RF00003	---	OtherNonCodingRNA	0	0	0	0.99552	1.59655	1.01405	0	1.20204	1.20204	0.256075	0.969868
ENSOCUT00000008698	ENSOCUG00000008696	CNBP	CCHC-type zinc finger nucleic acid binding protein	ProteinCodingRNA	11.2952	11.3195	11.3989	11.1993	11.5919	11.3872	11.3379	11.3928	0.0548995	0.62984	0.986021
ENSOCUT00000008699	ENSOCUG00000024878	HIST1H2AC	histone cluster 1 H2A family member c	ProteinCodingRNA	10.5409	10.1667	10.3104	10.5956	9.65213	9.73356	10.3393	9.99376	-0.345551	0.310826	0.986021
ENSOCUT00000014030	ENSOCUG00000014034	C3orf38	chromosome 3 open reading frame 38	ProteinCodingRNA	9.83796	9.82742	9.59022	9.84746	10.1035	10.0364	9.75187	9.99576	0.243892	0.0646035	0.70493
ENSOCUT00000021075	ENSOCUG00000001385	OAZ3	Oryctolagus cuniculus ornithine decarboxylase antizyme 3 (OAZ3), mRNA.	ProteinCodingRNA	2.38533	0	0	0	1.59655	2.02102	0.795111	1.20586	0.410745	0.922578	0.999819
MSTRG.18705.1	---	---	---	Predicted_LncRNA	11.4794	10.9189	10.7958	11.8243	10.5241	10.3964	11.0647	10.915	-0.149728	0.946371	0.999819
ENSOCUT00000032960	ENSOCUG00000028965	RF00012	---	OtherNonCodingRNA	0	0	1.08665	0	0	1.60366	0.362216	0.534555	0.172338	0.807367	0.986021
ENSOCUT00000029906	ENSOCUG00000026710	RF01186	small nucleolar RNA, C/D box 127	OtherNonCodingRNA	2.13084	1.99947	1.69938	1.57899	1.0087	2.6083	1.94323	1.73199	-0.211231	0.925346	0.999819
ENSOCUT00000021074	ENSOCUG00000017317	CDC42BPA	CDC42 binding protein kinase alpha	ProteinCodingRNA	11.2322	11.6117	11.6948	10.6484	11.7478	12.0778	11.5129	11.4913	-0.0215967	0.814683	0.986021
ENSOCUT00000023280	ENSOCUG00000026523	---	---	ProteinCodingRNA	4.89373	5.39162	5.20796	4.51498	4.97098	5.23667	5.16444	4.90754	-0.256894	0.513449	0.986021
ENSOCUT00000023282	ENSOCUG00000025943	---	---	ProteinCodingRNA	6.65394	6.69973	6.73657	6.83659	6.47658	5.64211	6.69675	6.31843	-0.378323	0.390288	0.986021
ENSOCUT00000005980	ENSOCUG00000005979	C4orf17	chromosome 4 open reading frame 17	ProteinCodingRNA	4.76515	4.39164	6.12002	4.84932	4.71712	4.78182	5.09227	4.78275	-0.309517	0.355578	0.986021
ENSOCUT00000023287	ENSOCUG00000022236	---	---	ProteinCodingRNA	6.48732	6.56915	6.35603	6.48298	6.24593	5.95825	6.47083	6.22905	-0.241783	0.346841	0.986021
ENSOCUT00000005187	ENSOCUG00000005187	CCDC42	coiled-coil domain containing 42	ProteinCodingRNA	0	3.58431	2.45817	0	2.01302	1.01405	2.01416	1.00902	-1.00514	0.283533	0.979983
ENSOCUT00000001262	ENSOCUG00000026012	---	---	ProteinCodingRNA	8.98135	8.79045	8.80098	8.74259	8.37043	8.9378	8.85759	8.68361	-0.173986	0.399605	0.986021
ENSOCUT00000021071	ENSOCUG00000026515	CXCL11	C-X-C motif chemokine ligand 11	ProteinCodingRNA	4.09201	5.58426	6.69022	5.4175	4.71712	5.5192	5.4555	5.21794	-0.237559	0.40845	0.986021
ENSOCUT00000004340	ENSOCUG00000004338	TJP1	tight junction protein 1	ProteinCodingRNA	13.3713	13.4095	13.2114	13.5418	13.1722	13.1516	13.3307	13.2885	-0.0422106	0.828145	0.986124
ENSOCUT00000004341	ENSOCUG00000004342	---	---	OtherNonCodingRNA	2.13084	3.80669	3.6133	1.99327	3.82346	2.6083	3.18361	2.80835	-0.375263	0.678141	0.986021
MSTRG.14511.2	---	---	---	Predicted_LncRNA	6.21934	7.05457	7.03739	7.33981	6.49288	6.41995	6.77044	6.75088	-0.019556	0.996921	0.999819
MSTRG.14511.3	---	---	---	Predicted_LncRNA	7.16785	7.28469	7.22247	7.68456	6.58701	6.64239	7.22501	6.97132	-0.253686	0.650424	0.986021
ENSOCUT00000001264	ENSOCUG00000001266	TOMM70	translocase of outer mitochondrial membrane 70	ProteinCodingRNA	10.4994	10.3612	10.171	10.4929	10.2569	10.3203	10.3439	10.3567	0.0128036	0.945357	0.999819
ENSOCUT00000001265	ENSOCUG00000001263	TECTA	tectorin alpha	ProteinCodingRNA	6.87775	6.10782	4.62058	5.3488	2.33582	0	5.86871	2.56154	-3.30718	0.0764618	0.737087
ENSOCUT00000030279	ENSOCUG00000023204	---	---	ProteinCodingRNA	7.19306	7.4669	7.67531	7.25787	7.42663	7.55137	7.44509	7.41196	-0.0331303	0.855349	0.991171
ENSOCUT00000027636	ENSOCUG00000025324	RF00100	---	OtherNonCodingRNA	2.13084	3.16929	2.95286	3.31385	3.01518	3.61062	2.751	3.31322	0.562222	0.379676	0.986021
ENSOCUT00000030196	ENSOCUG00000020945	---	---	ProteinCodingRNA	0	0	1.69938	0	0	0	0.566458	0	-0.566458	0.620804	0.986021
ENSOCUT00000015756	ENSOCUG00000015757	PIM2	Pim-2 proto-oncogene, serine/threonine kinase	ProteinCodingRNA	5.04908	5.45873	6.35603	5.27666	5.99435	6.11502	5.62128	5.79534	0.174059	0.795179	0.986021
ENSOCUT00000032969	ENSOCUG00000028974	RF00026	---	OtherNonCodingRNA	2.95595	2.58437	3.32054	2.79967	2.82223	3.34712	2.95362	2.98967	0.0360505	0.954579	0.999819
ENSOCUT00000008474	ENSOCUG00000008453	---	---	ProteinCodingRNA	12.5601	12.6022	12.5894	12.6101	12.3848	12.3869	12.5839	12.4606	-0.123305	0.23159	0.952743
ENSOCUT00000008475	ENSOCUG00000008476	PLK1	polo like kinase 1	ProteinCodingRNA	9.94448	9.44223	8.9461	9.87368	8.37043	7.81574	9.44427	8.68662	-0.757654	0.301132	0.983233
ENSOCUT00000008477	ENSOCUG00000008481	RABEFLA2	Elongation factor 1-alpha 1	ProteinCodingRNA	18.3396	18.3003	18.3139	18.2296	18.4718	18.4868	18.318	18.3961	0.0781179	0.528724	0.986021
ENSOCUT00000008470	ENSOCUG00000008469	MOXD1	monooxygenase DBH like 1	ProteinCodingRNA	10.5828	10.5945	10.5444	10.6267	10.7731	10.417	10.5739	10.6056	0.0316991	0.751986	0.986021
ENSOCUT00000008471	ENSOCUG00000008474	CD2	CD2 molecule	ProteinCodingRNA	3.36376	4.64317	5.80906	4.23943	4.40884	4.41896	4.60533	4.35574	-0.249591	0.393723	0.986021
ENSOCUT00000008472	ENSOCUG00000008468	MTO1	protein MTO1 homolog, mitochondrial	ProteinCodingRNA	9.46974	9.35684	9.28184	9.40467	9.33246	9.20034	9.36948	9.31249	-0.0569853	0.619116	0.986021
ENSOCUT00000008473	ENSOCUG00000008464	PRKG2	protein kinase, cGMP-dependent, type II	ProteinCodingRNA	8.39056	7.78065	6.93511	7.63493	8.0507	7.01643	7.70211	7.56735	-0.134758	0.653767	0.986021
ENSOCUT00000015752	ENSOCUG00000015759	EHD4	EH domain containing 4	ProteinCodingRNA	10.4117	10.7092	10.8175	10.411	10.5507	10.5278	10.6462	10.4965	-0.14968	0.262697	0.970468
ENSOCUT00000003804	ENSOCUG00000003807	SUV39H1	suppressor of variegation 3-9 homolog 1	ProteinCodingRNA	8.96436	8.27075	8.56452	8.84279	7.98881	7.86073	8.59988	8.23078	-0.369099	0.322238	0.986021
ENSOCUT00000016843	ENSOCUG00000016840	HDC	histidine decarboxylase	ProteinCodingRNA	4.57368	5.83219	5.94685	5.27666	5.06121	5.61235	5.45091	5.31674	-0.134169	0.619576	0.986021
ENSOCUT00000003807	ENSOCUG00000029324	MEPCE	methylphosphate capping enzyme	ProteinCodingRNA	10.2186	10.2245	10.2357	10.4474	10.5948	10.6772	10.2262	10.5731	0.346869	0.000334707	0.0463961
MSTRG.14505.1	---	---	---	Predicted_LncRNA	6.02712	5.35686	6.09652	6.23907	5.89969	5.11461	5.82683	5.75112	-0.0757078	0.923717	0.999819
ENSOCUT00000003801	ENSOCUG00000003795	ERBIN	erbb2 interacting protein	ProteinCodingRNA	13.0258	12.9958	12.8478	13.2326	12.8091	12.8361	12.9565	12.9593	0.00280846	0.928835	0.999819
ENSOCUT00000003803	ENSOCUG00000003802	---	---	ProteinCodingRNA	14.811	14.6701	14.6066	14.594	14.7834	14.7812	14.6959	14.7195	0.0236152	0.83895	0.98862
MSTRG.16410.1	---	---	---	Predicted_LncRNA	5.59443	3.80669	4.48235	5.38356	5.0168	3.72627	4.62782	4.70888	0.0810532	0.953077	0.999819
MSTRG.18765.1	---	---	---	Predicted_LncRNA	0	4.58428	0	4.45087	3.18535	4.34851	1.52809	3.99491	2.46681	0.517132	0.986021
ENSOCUT00000005546	ENSOCUG00000005547	SPEM2	SPEM family member 2	ProteinCodingRNA	0	1.99947	1.69938	0	2.59943	1.60366	1.23295	1.40103	0.168083	0.797935	0.986021
ENSOCUT00000028889	ENSOCUG00000000201	COL25A1	collagen type XXV alpha 1 chain	ProteinCodingRNA	2.38533	1.58449	2.95286	0.99552	3.4752	2.34434	2.30756	2.27169	-0.0358709	0.826079	0.986064
MSTRG.6502.1	---	---	---	Predicted_LncRNA	4.62398	4.9062	4.97005	5.48308	4.10379	4.48613	4.83341	4.691	-0.142413	0.960946	0.999819
ENSOCUT00000004698	ENSOCUG00000004702	CRP	C-reactive protein precursor	ProteinCodingRNA	0	1.99947	0	2.99215	2.59943	0	0.666488	1.86386	1.19737	0.353127	0.986021
ENSOCUT00000004168	ENSOCUG00000004167	UROD	uroporphyrinogen decarboxylase	ProteinCodingRNA	8.97651	8.93003	9.14821	9.04903	9.14917	9.20034	9.01825	9.13285	0.114597	0.337762	0.986021
ENSOCUT00000004169	ENSOCUG00000004170	TMEM201	transmembrane protein 201	ProteinCodingRNA	8.70288	8.54618	8.26584	8.80162	7.98881	7.81574	8.50497	8.20206	-0.302911	0.418587	0.986021
ENSOCUT00000004166	ENSOCUG00000004171	IL5	interleukin 5	ProteinCodingRNA	1.42753	1.58449	2.95286	2.79967	0	2.6083	1.98829	1.80266	-0.185635	0.935654	0.999819
ENSOCUT00000001407	ENSOCUG00000001407	MAGI2	membrane associated guanylate kinase, WW and PDZ domain containing 2	ProteinCodingRNA	9.04504	8.87273	9.10175	8.93941	8.07797	8.33166	9.00651	8.44968	-0.556828	0.042541	0.603048
ENSOCUT00000004164	ENSOCUG00000004165	IRF1	interferon regulatory factor 1	ProteinCodingRNA	7.75794	9.06807	9.54536	8.63129	8.42243	8.46251	8.79045	8.50541	-0.285042	0.271954	0.973426
ENSOCUT00000004697	ENSOCUG00000004691	PROM2	prominin 2	ProteinCodingRNA	12.7229	12.5798	12.376	12.713	12.1482	12.1475	12.5596	12.3363	-0.223301	0.316409	0.986021
ENSOCUT00000004162	ENSOCUG00000004163	SLC25A33	solute carrier family 25 member 33	ProteinCodingRNA	8.04777	7.80019	7.76748	8.32197	7.39227	7.28517	7.87181	7.66647	-0.205341	0.685651	0.986021
ENSOCUT00000028886	ENSOCUG00000026098	RF00026	---	OtherNonCodingRNA	1.42753	0	0	0	0	0	0.475843	0	-0.475843	0.68719	0.986021
ENSOCUT00000028557	ENSOCUG00000025905	RF00026	---	OtherNonCodingRNA	0	0	0	0	1.59655	1.60366	0	1.06674	1.06674	0.399462	0.986021
ENSOCUT00000028556	ENSOCUG00000021684	---	---	ProteinCodingRNA	2.6016	2.58437	2.1281	1.99327	3.01518	0	2.43802	1.66949	-0.768534	0.719704	0.986021
ENSOCUT00000013711	ENSOCUG00000013714	OR10X1	olfactory receptor family 10 subfamily X member 1 (gene/pseudogene)	ProteinCodingRNA	0	1.58449	0	1.57899	0	0	0.528162	0.526329	-0.00183367	0.99949	0.999819
ENSOCUT00000009259	ENSOCUG00000009261	TMEM40	transmembrane protein 40	ProteinCodingRNA	10.5955	10.7666	10.6581	11.0897	10.5719	10.828	10.6734	10.8299	0.156481	0.293101	0.980264
ENSOCUT00000009258	ENSOCUG00000009258	AMIGO2	adhesion molecule with Ig like domain 2	ProteinCodingRNA	4.57368	3.58431	4.06464	4.7987	3.71645	3.72627	4.07421	4.08048	0.00626366	0.943273	0.999819
MSTRG.19233.1	---	---	---	Predicted_LncRNA	0	0	0	0	7.03957	7.74893	0	4.9295	4.9295	0.0171709	0.41907
MSTRG.13347.1	---	---	---	Predicted_LncRNA	7.23412	7.614	7.51614	7.40893	7.33916	7.51966	7.45475	7.42258	-0.0321699	0.845042	0.989085
ENSOCUT00000009250	ENSOCUG00000009244	THBS4	thrombospondin 4	ProteinCodingRNA	12.2734	12.5852	12.6806	11.861	11.3205	13.6315	12.5131	12.271	-0.242053	0.847093	0.9894
ENSOCUT00000013713	ENSOCUG00000013715	C5orf34	chromosome 5 open reading frame 34	ProteinCodingRNA	8.02922	7.99929	7.86111	8.12548	7.7177	7.67888	7.96321	7.84069	-0.12252	0.557305	0.986021
ENSOCUT00000022073	ENSOCUG00000021145	HHLA1	HERV-H LTR-associating 1	ProteinCodingRNA	0	0	0	0.99552	0	0	0	0.33184	0.33184	0.80659	0.986021
ENSOCUT00000019562	ENSOCUG00000019562	RF00019	---	OtherNonCodingRNA	1.82162	1.58449	2.1281	2.99215	3.33754	2.83136	1.84474	3.05368	1.20895	0.0729316	0.730675
ENSOCUT00000019564	ENSOCUG00000019564	RF00026	---	OtherNonCodingRNA	4.0187	3.32129	3.6133	2.79967	3.60086	3.0245	3.65109	3.14168	-0.509418	0.359477	0.986021
ENSOCUT00000019565	ENSOCUG00000019565	RF00406	---	OtherNonCodingRNA	3.85986	4.16925	3.14838	3.16195	3.4752	3.93301	3.72583	3.52339	-0.202444	0.661201	0.986021
ENSOCUT00000029935	ENSOCUG00000025953	---	---	ProteinCodingRNA	7.98179	7.80019	5.75003	8.5571	3.33754	2.6083	7.17734	4.83432	-2.34302	0.792395	0.986021
ENSOCUT00000006500	ENSOCUG00000006498	DSG1	desmoglein 1	ProteinCodingRNA	16.3038	16.6041	16.8874	16.4478	17.0592	16.9205	16.5985	16.8092	0.210699	0.392829	0.986021
ENSOCUT00000014214	ENSOCUG00000014210	---	---	ProteinCodingRNA	1.82162	0	2.1281	0.99552	4.01626	2.02102	1.31657	2.34427	1.02769	0.240138	0.959884
ENSOCUT00000020578	ENSOCUG00000020578	RF00004	---	OtherNonCodingRNA	0	0	0	0	1.59655	0	0	0.532182	0.532182	0.638012	0.986021
ENSOCUT00000014211	ENSOCUG00000023708	---	---	ProteinCodingRNA	6.60469	7.20875	7.25468	6.51469	2.82223	0	7.02271	3.11231	-3.9104	0.250681	0.968372
ENSOCUT00000014213	ENSOCUG00000014215	MOGAT2	monoacylglycerol O-acyltransferase 2	ProteinCodingRNA	0	0	1.69938	2.31475	2.01302	1.60366	0.566458	1.97715	1.41069	0.205367	0.938709
ENSOCUT00000020572	ENSOCUG00000020572	RF00026	---	OtherNonCodingRNA	0	0.999643	0	0	1.59655	0	0.333214	0.532182	0.198967	0.811775	0.986021
ENSOCUT00000020571	ENSOCUG00000020571	RF00026	---	OtherNonCodingRNA	0.883565	0	0	0	0	0	0.294522	0	-0.294522	0.820752	0.986021
ENSOCUT00000018310	ENSOCUG00000018310	---	---	OtherNonCodingRNA	2.38533	2.58437	2.1281	2.99215	3.33754	3.48487	2.36593	3.27152	0.90559	0.139162	0.870231
MSTRG.9858.1	---	---	---	Predicted_LncRNA	6.88808	6.62865	6.54151	6.746	6.2839	6.1975	6.68608	6.40913	-0.276945	0.302407	0.983233
ENSOCUT00000023848	ENSOCUG00000027270	---	---	ProteinCodingRNA	12.0946	12.0768	11.9607	12.2974	11.6093	11.6745	12.044	11.8604	-0.18362	0.477063	0.986021
ENSOCUT00000028776	ENSOCUG00000025605	---	---	ProteinCodingRNA	10.4144	10.3144	10.1049	10.3887	10.2759	10.1352	10.2779	10.2666	-0.0113104	0.915858	0.999819
ENSOCUT00000028773	ENSOCUG00000026246	---	---	ProteinCodingRNA	9.88771	9.734	9.92643	9.80321	10.0341	10.0378	9.84938	9.95837	0.108992	0.360695	0.986021
ENSOCUT00000015924	ENSOCUG00000015924	MCM2	minichromosome maintenance complex component 2	ProteinCodingRNA	10.5318	9.79045	9.42787	10.198	8.98597	8.749	9.91672	9.31101	-0.605715	0.22798	0.952162
ENSOCUT00000015925	ENSOCUG00000015920	SLC4A9	anion exchange protein 4	ProteinCodingRNA	8.07062	7.34802	7.53375	7.81124	8.17715	7.84162	7.65079	7.94334	0.292544	0.300862	0.983233
ENSOCUT00000015926	ENSOCUG00000015938	CCDC122	coiled-coil domain containing 122	ProteinCodingRNA	4.46749	6.53845	6.39509	5.92191	6.33905	5.83482	5.80034	6.03193	0.231586	0.999637	0.999824
ENSOCUT00000015927	ENSOCUG00000015937	RBM41	RNA binding motif protein 41	ProteinCodingRNA	7.32054	7.37433	6.31589	7.58353	6.71761	6.56682	7.00359	6.95599	-0.0476009	0.902547	0.99875
ENSOCUT00000028086	ENSOCUG00000026881	---	---	ProteinCodingRNA	1.42753	2.32136	0	2.57749	0	0	1.24963	0.859163	-0.390466	0.932798	0.999819
ENSOCUT00000028085	ENSOCUG00000025271	---	---	ProteinCodingRNA	4.76515	3.99933	3.74004	4.38377	3.18535	3.93301	4.16818	3.83404	-0.334134	0.546397	0.986021
ENSOCUT00000028084	ENSOCUG00000014664	PLCZ1	phospholipase C zeta 1	ProteinCodingRNA	2.95595	1.99947	0	2.57749	0	0	1.65181	0.859163	-0.792643	0.661776	0.986021
ENSOCUT00000031089	ENSOCUG00000027359	---	---	ProteinCodingRNA	8.48884	7.85104	8.09847	8.11518	7.34815	7.52766	8.14612	7.66366	-0.482457	0.105018	0.803746
ENSOCUT00000018210	ENSOCUG00000018210	RF00004	---	OtherNonCodingRNA	2.78963	2.32136	0	2.99215	2.33582	1.01405	1.70366	2.11401	0.410344	0.847281	0.989409
ENSOCUT00000012325	ENSOCUG00000012324	ALPK2	alpha kinase 2	ProteinCodingRNA	5.69197	5.45873	5.99849	4.51498	3.82346	4.93393	5.7164	4.42412	-1.29227	0.00202481	0.13813
ENSOCUT00000028088	ENSOCUG00000022299	PI15	peptidase inhibitor 15	ProteinCodingRNA	8.92478	7.86348	7.33721	8.28107	5.99435	5.41962	8.04182	6.56501	-1.47681	0.149635	0.882866
ENSOCUT00000012323	ENSOCUG00000012326	IL18BP	interleukin-18-binding protein precursor	ProteinCodingRNA	7.8768	8.19896	8.67177	8.07321	8.15683	8.28997	8.24918	8.17333	-0.0758423	0.657715	0.986021
MSTRG.18190.1	---	---	---	Predicted_LncRNA	10.92	10.7492	10.771	10.876	10.752	10.569	10.8134	10.7323	-0.0810449	0.523801	0.986021
ENSOCUT00000018217	ENSOCUG00000018217	RF00100	---	OtherNonCodingRNA	2.13084	4.45875	2.45817	2.31475	3.33754	3.72627	3.01592	3.12619	0.110268	0.843048	0.989085
ENSOCUT00000018960	ENSOCUG00000018960	RF00334	---	OtherNonCodingRNA	5.01178	4.9062	5.55692	5.54581	5.50881	4.98127	5.1583	5.34529	0.186995	0.600196	0.986021
ENSOCUT00000032688	ENSOCUG00000028693	RF00096	---	OtherNonCodingRNA	2.95595	3.16929	2.72661	3.16195	3.18535	2.83136	2.95062	3.05955	0.108933	0.857253	0.991171
MSTRG.12266.1	---	---	---	Predicted_LncRNA	10.3937	10.4811	10.7238	10.4879	11.1021	11.0095	10.5329	10.8665	0.333644	0.0805956	0.745918
ENSOCUT00000023849	ENSOCUG00000012543	PPP3CB	serine/threonine-protein phosphatase 2B catalytic subunit beta isoform	ProteinCodingRNA	11.1189	11.0133	10.9257	11.0361	10.8931	10.9872	11.0193	10.9721	-0.0471755	0.611908	0.986021
ENSOCUT00000032683	ENSOCUG00000028688	RF00156	---	OtherNonCodingRNA	0	2.32136	2.1281	0.99552	0	0	1.48315	0.33184	-1.15131	0.236623	0.957663
ENSOCUT00000032681	ENSOCUG00000028686	RF00004	---	OtherNonCodingRNA	0	0	2.1281	0	0	0	0.709366	0	-0.709366	0.516882	0.986021
ENSOCUT00000032686	ENSOCUG00000028691	RF00026	---	OtherNonCodingRNA	2.13084	0.999643	1.08665	0	2.01302	2.02102	1.40571	1.34468	-0.0610277	0.938207	0.999819
ENSOCUT00000032687	ENSOCUG00000028692	RF01225	---	OtherNonCodingRNA	1.42753	2.32136	2.95286	1.57899	4.33841	3.19481	2.23391	3.0374	0.803485	0.225647	0.951724
ENSOCUT00000030428	ENSOCUG00000003593	ACSL5	acyl-CoA synthetase long chain family member 5	ProteinCodingRNA	10.99	11.5273	11.7481	11.0844	12.3268	12.533	11.4218	11.9814	0.559626	0.0854074	0.756616
ENSOCUT00000030429	ENSOCUG00000027642	---	---	ProteinCodingRNA	7.36559	7.70665	7.16714	7.48293	7.24604	7.34067	7.41313	7.35655	-0.0565801	0.736907	0.986021
ENSOCUT00000026834	ENSOCUG00000027512	---	---	ProteinCodingRNA	0.883565	0	1.69938	1.99327	0	2.6083	0.86098	1.53386	0.672879	0.438627	0.986021
ENSOCUT00000013723	ENSOCUG00000013726	EFNB1	ephrin B1	ProteinCodingRNA	10.7235	10.5346	10.1412	10.9481	9.72813	9.62598	10.4664	10.1007	-0.365691	0.502655	0.986021
ENSOCUT00000026836	ENSOCUG00000026537	---	---	ProteinCodingRNA	0	4.24725	4.48235	0	0	3.34712	2.90987	1.11571	-1.79416	0.327423	0.986021
ENSOCUT00000026837	ENSOCUG00000022798	C2orf15	chromosome 2 open reading frame 15	ProteinCodingRNA	4.0187	3.69978	2.45817	3.69216	3.71645	3.72627	3.39222	3.71163	0.319409	0.77887	0.986021
ENSOCUT00000030932	ENSOCUG00000022596	---	---	ProteinCodingRNA	3.77336	5.32123	4.68502	4.3134	4.66051	4.61177	4.5932	4.52856	-0.0646437	0.719282	0.986021
ENSOCUT00000005536	ENSOCUG00000005537	RSPH9	radial spoke head 9 homolog	ProteinCodingRNA	6.10002	5.80665	5.29312	5.99117	5.94779	5.88547	5.73326	5.94148	0.208211	0.593667	0.986021
ENSOCUT00000030930	ENSOCUG00000025427	LBX2	ladybird homeobox 2	ProteinCodingRNA	0	0	0	1.57899	0	0	0	0.526329	0.526329	0.642233	0.986021
ENSOCUT00000030931	ENSOCUG00000023278	MTNR1A	melatonin receptor 1A	ProteinCodingRNA	3.77336	1.99947	3.85655	4.16145	2.82223	2.6083	3.20979	3.19733	-0.0124626	0.949967	0.999819
ENSOCUT00000030936	ENSOCUG00000021280	VAC14	Vac14, PIKFYVE complex component	ProteinCodingRNA	10.6759	10.6717	10.8894	10.7625	10.7427	10.6718	10.7457	10.7257	-0.0199964	0.827565	0.986124
ENSOCUT00000011594	ENSOCUG00000011593	DCP1B	decapping mRNA 1B	ProteinCodingRNA	8.01986	8.0272	8.53423	7.79842	8.40099	7.94671	8.19376	8.04871	-0.145053	0.576997	0.986021
MSTRG.276.1	---	---	---	Predicted_LncRNA	8.05695	8.01052	7.81145	8.01343	8.2461	8.00513	7.95964	8.08822	0.128582	0.422417	0.986021
ENSOCUT00000030935	ENSOCUG00000025569	CCR7	C-C motif chemokine receptor 7	ProteinCodingRNA	6.52751	6.97657	7.33721	7.56093	4.97098	5.3492	6.9471	5.96037	-0.986729	0.43057	0.986021
ENSOCUT00000019124	ENSOCUG00000019124	RF00091	---	OtherNonCodingRNA	1.42753	1.58449	2.1281	2.99215	3.4752	3.61062	1.71337	3.35932	1.64595	0.015297	0.393008
ENSOCUT00000020160	ENSOCUG00000020160	RF00619	---	OtherNonCodingRNA	1.42753	1.58449	0	0	1.0087	0	1.00401	0.336232	-0.667774	0.48236	0.986021
ENSOCUT00000020162	ENSOCUG00000020162	---	---	OtherNonCodingRNA	1.42753	0	0	0	0	0	0.475843	0	-0.475843	0.68719	0.986021
ENSOCUT00000005535	ENSOCUG00000005539	NLGN2	neuroligin 2	ProteinCodingRNA	10.3326	10.1104	10.2167	10.4769	9.57765	10.1966	10.2199	10.0837	-0.136213	0.702237	0.986021
ENSOCUT00000001124	ENSOCUG00000001123	---	---	OtherNonCodingRNA	4.41131	3.32129	3.32054	4.16145	3.82346	3.34712	3.68438	3.77734	0.0929637	0.975134	0.999819
ENSOCUT00000020166	ENSOCUG00000027399	RF00618	---	OtherNonCodingRNA	3.68134	2.80674	2.45817	3.99159	4.18631	4.27443	2.98208	4.15078	1.16869	0.0524846	0.65005
ENSOCUT00000020167	ENSOCUG00000020167	RF00604	---	OtherNonCodingRNA	0.883565	0	0	0.99552	1.0087	1.60366	0.294522	1.20263	0.908105	0.358792	0.986021
ENSOCUT00000029866	ENSOCUG00000022444	---	---	ProteinCodingRNA	5.73838	5.9993	5.59095	5.07875	6.52494	6.75562	5.77621	6.11977	0.343564	0.292603	0.980264
ENSOCUT00000001009	ENSOCUG00000001009	NFE2L2	nuclear factor, erythroid 2 like 2	ProteinCodingRNA	9.49361	11.1767	11.5428	11.0838	9.74524	9.43731	10.7377	10.0888	-0.648935	0.219983	0.949977
ENSOCUT00000031331	ENSOCUG00000027980	---	---	ProteinCodingRNA	6.15237	7.29391	7.49832	7.62043	7.79862	7.91049	6.98153	7.77651	0.79498	0.0579761	0.678177
MSTRG.13908.1	---	---	---	Predicted_LncRNA	7.34324	7.13884	7.52497	7.6635	7.65388	6.75562	7.33569	7.35766	0.0219795	0.812755	0.986021
ENSOCUT00000005538	ENSOCUG00000005546	ATXN7L2	ataxin 7 like 2	ProteinCodingRNA	6.04569	0	4.74671	0	0	2.6083	3.59747	0.869434	-2.72804	0.176829	0.914954
ENSOCUT00000031335	ENSOCUG00000026310	CASZ1	castor zinc finger 1	ProteinCodingRNA	13.1305	13.1276	13.0501	13.5335	12.8467	12.6705	13.1027	13.0169	-0.0858501	0.882137	0.994279
ENSOCUT00000002694	ENSOCUG00000002695	NFATC2IP	nuclear factor of activated T cells 2 interacting protein	ProteinCodingRNA	10.0925	10.0409	9.94793	10.1087	10.0521	9.8828	10.0271	10.0145	-0.0125898	0.916713	0.999819
ENSOCUT00000002692	ENSOCUG00000002690	ACSF2	acyl-CoA synthetase family member 2	ProteinCodingRNA	11.3097	11.2742	11.2663	11.0504	10.9197	11.0545	11.2834	11.0082	-0.275234	0.000439757	0.0531543
ENSOCUT00000002693	ENSOCUG00000002692	GRIK4	glutamate ionotropic receptor kainate type subunit 4	ProteinCodingRNA	5.84825	6.08676	4.55312	5.74608	3.4752	4.67071	5.49604	4.63066	-0.865379	0.282923	0.979983
ENSOCUT00000002691	ENSOCUG00000002694	KPNA1	karyopherin subunit alpha 1	ProteinCodingRNA	9.97387	10.0396	10.0386	10.0106	10.1206	9.99372	10.0173	10.0417	0.0243088	0.767229	0.986021
ENSOCUT00000017742	ENSOCUG00000017742	FHL5	four and a half LIM domains 5	ProteinCodingRNA	8.37229	8.58425	8.73402	8.17097	9.27705	9.25192	8.56352	8.89998	0.336459	0.195145	0.928972
ENSOCUT00000027649	ENSOCUG00000023095	TRMT13	tRNA methyltransferase 13 homolog	ProteinCodingRNA	8.84485	8.85727	9.02291	8.91289	8.95394	8.82232	8.90834	8.89638	-0.0119632	0.921651	0.999819
ENSOCUT00000017744	ENSOCUG00000017741	HIF1A	hypoxia-inducible factor 1-alpha	ProteinCodingRNA	13.0037	12.9708	13.1022	12.9203	13.0544	13.2236	13.0256	13.0661	0.0405174	0.702265	0.986021
ENSOCUT00000013186	ENSOCUG00000013189	FABP12	fatty acid binding protein 12	ProteinCodingRNA	0	0	0	1.99327	0	0	0	0.664425	0.664425	0.537999	0.986021
ENSOCUT00000005569	ENSOCUG00000005571	CA5B	carbonic anhydrase 5B	ProteinCodingRNA	9.80836	10.3895	10.2898	9.2971	10.533	10.9675	10.1625	10.2659	0.103354	0.551132	0.986021
ENSOCUT00000005568	ENSOCUG00000005569	GCHFR	GTP cyclohydrolase I feedback regulator	ProteinCodingRNA	2.38533	3.69978	3.85655	3.31385	4.66051	4.34851	3.31389	4.10762	0.793734	0.219956	0.949977
MSTRG.11795.1	---	---	---	Predicted_LncRNA	5.86926	5.85728	6.2321	5.60592	6.89984	6.75562	5.98621	6.42046	0.434245	0.188828	0.922687
ENSOCUT00000005566	ENSOCUG00000005568	GBA3	glucosylceramidase beta 3 (gene/pseudogene)	ProteinCodingRNA	3.58305	0	0	1.99327	2.01302	0	1.19435	1.33543	0.141084	0.704139	0.986021
ENSOCUT00000013188	ENSOCUG00000013181	CNTN3	contactin 3	ProteinCodingRNA	9.00526	8.55004	8.71099	8.35738	7.98881	8.63152	8.75543	8.3259	-0.429529	0.0666983	0.707872
ENSOCUT00000030681	ENSOCUG00000025681	LRRN4	leucine rich repeat neuronal 4	ProteinCodingRNA	0	1.99947	0	0	2.59943	1.01405	0.666488	1.20449	0.538003	0.677617	0.986021
ENSOCUT00000005563	ENSOCUG00000005562	SLC44A5	solute carrier family 44 member 5	ProteinCodingRNA	3.10507	4.80667	3.6133	3.89852	3.71645	3.19481	3.84168	3.60326	-0.238419	0.540047	0.986021
ENSOCUT00000005562	ENSOCUG00000005565	---	---	ProteinCodingRNA	3.10507	0	3.6133	0	3.60086	2.83136	2.23946	2.14407	-0.0953817	0.939217	0.999819
ENSOCUT00000007826	ENSOCUG00000007824	G2E3	G2/M-phase specific E3 ubiquitin protein ligase	ProteinCodingRNA	9.79744	9.55003	9.43257	9.75259	9.36161	9.38107	9.59335	9.49842	-0.0949286	0.599358	0.986021
ENSOCUT00000015679	ENSOCUG00000015680	PPHLN1	periphilin 1	ProteinCodingRNA	7.48607	8.04368	7.95557	7.75925	8.27467	8.07225	7.82844	8.03539	0.20695	0.388852	0.986021
ENSOCUT00000006505	ENSOCUG00000006505	MGA	MGA, MAX dimerization protein	ProteinCodingRNA	12.5282	12.5078	12.6309	12.508	12.7108	12.6028	12.5556	12.6072	0.0515539	0.576314	0.986021
MSTRG.11986.1	---	---	---	Predicted_LncRNA	9.2591	9.8758	9.37757	10.2126	9.67016	9.52976	9.50416	9.80418	0.300021	0.235427	0.95705
ENSOCUT00000015675	ENSOCUG00000015679	TRIM10	tripartite motif containing 10	ProteinCodingRNA	0	0.999643	1.69938	0	0	0	0.899673	0	-0.899673	0.502775	0.986021
ENSOCUT00000015676	ENSOCUG00000015673	ZP1	zona pellucida sperm-binding protein 1 precursor	ProteinCodingRNA	3.24021	3.80669	3.47433	3.69216	3.18535	4.78182	3.50708	3.88644	0.379366	0.389228	0.986021
MSTRG.11986.2	---	---	---	Predicted_LncRNA	0	0	7.36698	0	0	0	2.45566	0	-2.45566	1.22443e-08	6.78909e-06
ENSOCUT00000015670	ENSOCUG00000015676	---	---	ProteinCodingRNA	0	1.58449	0	0	4.47599	4.67071	0.528162	3.0489	2.52074	0.0217857	0.456368
ENSOCUT00000005288	ENSOCUG00000005287	---	---	ProteinCodingRNA	10.3873	10.9062	11.1732	10.6457	11.3108	11.0016	10.8222	10.986	0.16379	0.553093	0.986021
ENSOCUT00000015673	ENSOCUG00000015674	COMMD9	COMM domain containing 9	ProteinCodingRNA	9.74301	9.78229	9.82283	9.78057	9.77721	9.75585	9.78271	9.77121	-0.0114964	0.89288	0.996752
ENSOCUT00000011956	ENSOCUG00000011953	CENPI	centromere protein I	ProteinCodingRNA	8.24146	7.32122	7.30681	7.96261	6.66102	6.59753	7.62316	7.07372	-0.549444	0.316946	0.986021
MSTRG.9726.1	---	---	---	Predicted_LncRNA	8.76584	9.14395	8.83333	8.57976	8.96567	9.20284	8.91437	8.91609	0.00171781	0.945846	0.999819
ENSOCUT00000026827	ENSOCUG00000024811	RF00415	---	OtherNonCodingRNA	2.38533	1.58449	2.72661	1.99327	2.01302	2.02102	2.23214	2.00911	-0.223038	0.692412	0.986021
ENSOCUT00000004700	ENSOCUG00000004704	BNIPL	BCL2 interacting protein like	ProteinCodingRNA	10.9792	11.0021	11.2677	10.9747	11.3538	11.0873	11.083	11.1386	0.0556337	0.701218	0.986021
ENSOCUT00000017298	ENSOCUG00000017291	FBXO38	F-box protein 38	ProteinCodingRNA	10.2787	10.398	10.6143	10.6984	10.9672	10.9091	10.4303	10.8582	0.427858	0.00233814	0.153734
ENSOCUT00000010248	ENSOCUG00000010249	UBE2T	ubiquitin conjugating enzyme E2 T	ProteinCodingRNA	6.60469	6.47503	5.37354	7.23901	3.71645	3.0245	6.15109	4.65999	-1.4911	0.689861	0.986021
ENSOCUT00000010249	ENSOCUG00000010238	PIEZO2	piezo type mechanosensitive ion channel component 2	ProteinCodingRNA	10.1201	9.7625	10.1906	9.7887	9.14659	11.0812	10.0244	10.0055	-0.0189197	0.659749	0.986021
ENSOCUT00000010246	ENSOCUG00000010247	ATP6V0D2	ATPase H+ transporting V0 subunit d2	ProteinCodingRNA	3.94146	4.16925	3.96434	6.27654	9.61164	5.38484	4.02502	7.09101	3.06599	6.86875e-06	0.00199791
ENSOCUT00000010244	ENSOCUG00000010245	---	---	ProteinCodingRNA	7.43062	7.62134	7.80421	7.79842	7.74518	7.64987	7.61873	7.73116	0.112431	0.521084	0.986021
ENSOCUT00000017565	ENSOCUG00000017567	BYSL	bystin like	ProteinCodingRNA	8.72033	8.61031	8.32265	8.74927	8.66475	8.37661	8.5511	8.59688	0.0457803	0.812477	0.986021
ENSOCUT00000017562	ENSOCUG00000017568	P2RY6	pyrimidinergic receptor P2Y6	ProteinCodingRNA	3.36376	3.45878	4.32946	3.79902	4.10379	4.48613	3.71733	4.12965	0.412315	0.449816	0.986021
ENSOCUT00000010243	ENSOCUG00000028989	CREB3	cAMP responsive element binding protein 3	ProteinCodingRNA	9.70991	9.90918	10.1107	9.74091	9.95396	10.2288	9.90994	9.97457	0.064624	0.702954	0.986021
MSTRG.17887.1	---	---	---	Predicted_LncRNA	7.20137	7.44223	7.52497	7.43402	7.16697	7.18764	7.38952	7.26288	-0.126648	0.514086	0.986021
ENSOCUT00000017293	ENSOCUG00000017295	FIGLA	folliculogenesis specific bHLH transcription factor	ProteinCodingRNA	3.36376	3.32129	4.24647	3.45128	3.18535	3.34712	3.64384	3.32791	-0.315926	0.504303	0.986021
ENSOCUT00000033799	ENSOCUG00000029165	DIS3L2	DIS3 like 3-5 exoribonuclease 2	ProteinCodingRNA	10.4233	10.3235	10.1961	10.3876	10.144	10.1127	10.3143	10.2148	-0.0994955	0.446547	0.986021
ENSOCUT00000025869	ENSOCUG00000025031	DNAAF4	dynein axonemal assembly factor 4	ProteinCodingRNA	4.89373	5.64316	5.02088	5.07875	4.92366	4.98127	5.18592	4.99456	-0.191364	0.52969	0.986021
MSTRG.12014.1	---	---	---	Predicted_LncRNA	4.22832	3.16929	2.95286	3.57674	4.71712	4.02623	3.45016	4.1067	0.656539	0.319963	0.986021
ENSOCUT00000024081	ENSOCUG00000020972	CYP2C14	cytochrome P450 2C14 precursor	ProteinCodingRNA	3.68134	4.16925	4.55312	3.16195	4.18631	5.38484	4.13457	4.24437	0.109797	0.59921	0.986021
ENSOCUT00000013459	ENSOCUG00000013461	CRYL1	lambda-crystallin	ProteinCodingRNA	10.0563	9.3458	8.79734	9.93648	8.49707	8.38982	9.39982	8.94112	-0.458697	0.452159	0.986021
ENSOCUT00000013457	ENSOCUG00000013454	PRDM5	PR/SET domain 5	ProteinCodingRNA	8.74611	8.80664	8.90611	8.39619	8.67907	9.12594	8.81962	8.73374	-0.0858818	0.800227	0.986021
ENSOCUT00000013454	ENSOCUG00000013457	CCKAR	cholecystokinin receptor type A	ProteinCodingRNA	0	2.58437	0	0	2.59943	0	0.861456	0.866475	0.00501937	0.995316	0.999819
ENSOCUT00000013455	ENSOCUG00000013458	---	---	ProteinCodingRNA	0	0.999643	1.08665	0	0	0	0.695431	0	-0.695431	0.634103	0.986021
ENSOCUT00000033796	ENSOCUG00000003929	SMAD4	SMAD family member 4	ProteinCodingRNA	8.19646	7.9418	8.00058	7.99669	8.38361	8.31328	8.04628	8.23119	0.18491	0.283542	0.979983
MSTRG.13685.1	---	---	---	Predicted_LncRNA	7.3803	6.75418	6.43311	6.9911	5.74493	4.67071	6.85586	5.80225	-1.05361	0.1743	0.911199
ENSOCUT00000032045	ENSOCUG00000002302	ZNF318	zinc finger protein 318	ProteinCodingRNA	10.3155	10.3862	10.4444	10.3387	10.7655	10.7567	10.382	10.6203	0.238261	0.099935	0.796525
ENSOCUT00000013535	ENSOCUG00000013537	NR1I3	nuclear receptor subfamily 1 group I member 3	ProteinCodingRNA	3.24021	3.80669	3.6133	3.31385	3.82346	2.6083	3.5534	3.24854	-0.304859	0.680638	0.986021
ENSOCUT00000013534	ENSOCUG00000013542	MRPL44	mitochondrial ribosomal protein L44	ProteinCodingRNA	8.92478	8.39589	8.52105	8.87063	8.643	8.6536	8.61391	8.72241	0.108504	0.631774	0.986021
ENSOCUT00000013537	ENSOCUG00000013535	---	---	OtherNonCodingRNA	3.58305	4.08679	3.6133	4.16145	4.01626	3.83334	3.76105	4.00368	0.242638	0.610987	0.986021
MSTRG.17133.1	---	---	---	Predicted_LncRNA	5.59443	1.99947	1.69938	2.31475	2.33582	2.34434	3.09776	2.33164	-0.76612	0.0862202	0.758455
ENSOCUT00000007377	ENSOCUG00000007374	ATP12A	potassium-transporting ATPase alpha chain 2	ProteinCodingRNA	10.9665	11.9013	12.3442	12.4851	12.4517	12.0469	11.7373	12.3279	0.590574	0.140682	0.872298
ENSOCUT00000010840	ENSOCUG00000010839	ATG4A	autophagy related 4A cysteine peptidase	ProteinCodingRNA	11.379	10.9766	9.89101	11.3882	9.32109	9.37222	10.7489	10.0272	-0.721711	0.524403	0.986021
ENSOCUT00000032048	ENSOCUG00000026354	PGF	placental growth factor	ProteinCodingRNA	6.65394	6.39161	5.86577	6.31307	6.89984	6.64239	6.30377	6.61843	0.314657	0.346317	0.986021
ENSOCUT00000015582	ENSOCUG00000015579	UAP1	UDP-N-acetylglucosamine pyrophosphorylase 1	ProteinCodingRNA	9.01708	9.39803	9.76995	9.21504	9.51716	9.62225	9.39502	9.45149	0.0564645	0.879822	0.993824
ENSOCUT00000015583	ENSOCUG00000015589	CCND2	cyclin D2	ProteinCodingRNA	13.487	13.4569	13.4646	13.4961	12.9156	12.7096	13.4695	13.0404	-0.429057	0.0828319	0.754459
ENSOCUT00000015580	ENSOCUG00000015583	---	---	ProteinCodingRNA	8.61856	8.77737	8.80098	8.6421	8.78217	8.40292	8.7323	8.60906	-0.123239	0.451793	0.986021
ENSOCUT00000016165	ENSOCUG00000016170	PBXIP1	PBX homeobox interacting protein 1	ProteinCodingRNA	9.72006	9.87734	10.0447	9.54178	9.93469	9.88747	9.88071	9.78798	-0.0927303	0.590561	0.986021
ENSOCUT00000000412	ENSOCUG00000000412	UMPS	uridine monophosphate synthetase	ProteinCodingRNA	9.194	8.80664	8.65176	8.97118	8.87839	8.62035	8.88413	8.82331	-0.0608258	0.714404	0.986021
ENSOCUT00000016167	ENSOCUG00000016173	WNT2	protein Wnt-2 precursor	ProteinCodingRNA	8.11965	8.26608	8.47166	7.5984	7.48485	7.29457	8.2858	7.45927	-0.826524	3.50533e-06	0.00113082
ENSOCUT00000016161	ENSOCUG00000016157	EXO1	exonuclease 1	ProteinCodingRNA	8.99575	8.28006	7.54247	8.73251	6.70367	6.92255	8.27276	7.45291	-0.819847	0.294169	0.980264
MSTRG.18438.1	---	---	---	Predicted_LncRNA	5.8053	0	0	6.27654	0	1.60366	1.9351	2.62674	0.691635	0.890194	0.995818
ENSOCUT00000015588	ENSOCUG00000015599	GEMIN6	gem nuclear organelle associated protein 6	ProteinCodingRNA	6.23561	6.53845	6.78147	5.94537	6.20693	6.41995	6.51851	6.19075	-0.327763	0.225959	0.951724
ENSOCUT00000015589	ENSOCUG00000015593	KRT39	keratin 39	ProteinCodingRNA	13.141	12.516	10.4304	13.0007	6.61707	6.56682	12.0291	8.72819	-3.30093	0.587966	0.986021
ENSOCUT00000028135	ENSOCUG00000005559	TBC1D9	TBC1 domain family member 9	ProteinCodingRNA	10.0757	10.2026	10.0661	10.0825	10.4096	10.8385	10.1148	10.4435	0.32876	0.0879052	0.762039
ENSOCUT00000016094	ENSOCUG00000016099	C15orf41	chromosome 15 open reading frame 41	ProteinCodingRNA	5.91037	5.88194	5.6242	5.51478	6.3209	6.38518	5.80551	6.07362	0.268115	0.351473	0.986021
ENSOCUT00000007370	ENSOCUG00000007354	HUWE1	HECT, UBA and WWE domain containing 1, E3 ubiquitin protein ligase	ProteinCodingRNA	15.2804	15.1876	14.9511	15.3203	14.745	14.7872	15.1397	14.9509	-0.188879	0.426382	0.986021
ENSOCUT00000002032	ENSOCUG00000002033	SPATA7	spermatogenesis associated 7	ProteinCodingRNA	8.2851	8.11823	8.42996	8.02998	8.65754	8.75922	8.27776	8.48225	0.204482	0.329108	0.986021
ENSOCUT00000002030	ENSOCUG00000002031	AGA	aspartylglucosaminidase	ProteinCodingRNA	9.84726	9.9315	9.94793	9.83966	9.77721	10.0723	9.9089	9.8964	-0.0124962	0.953117	0.999819
ENSOCUT00000033249	ENSOCUG00000010631	PIK3CA	phosphatidylinositol-4,5-bisphosphate 3-kinase catalytic subunit alpha	ProteinCodingRNA	8.58403	8.53845	8.07462	8.06252	7.50106	7.86705	8.39903	7.81021	-0.588823	0.0118948	0.3559
ENSOCUT00000033248	ENSOCUG00000013662	ACADM	acyl-CoA dehydrogenase medium chain	ProteinCodingRNA	2.6016	3.16929	3.14838	0	3.4752	2.02102	2.97309	1.83208	-1.14101	0.564131	0.986021
ENSOCUT00000021569	ENSOCUG00000025843	DISP2	dispatched RND transporter family member 2	ProteinCodingRNA	3.47757	2.99938	3.74004	3.57674	3.18535	3.48487	3.40566	3.41565	0.00999124	0.989041	0.999819
ENSOCUT00000033021	ENSOCUG00000029014	C1orf105	chromosome 1 open reading frame 105	ProteinCodingRNA	2.6016	3.32129	4.24647	3.16195	3.60086	2.83136	3.38978	3.19806	-0.191727	0.651659	0.986021
ENSOCUT00000033245	ENSOCUG00000014647	USP15	ubiquitin specific peptidase 15	ProteinCodingRNA	7.8716	3.32129	4.06464	3.31385	3.82346	3.48487	5.08584	3.54073	-1.54511	0.00660477	0.268938
ENSOCUT00000002039	ENSOCUG00000002041	UQCRC1	ubiquinol-cytochrome c reductase core protein 1	ProteinCodingRNA	12.0752	11.7487	11.6963	12.1379	11.8498	11.8473	11.8401	11.945	0.104943	0.522654	0.986021
ENSOCUT00000033241	ENSOCUG00000014355	PFKFB2	6-phosphofructo-2-kinase/fructose-2,6-biphosphatase 2	ProteinCodingRNA	9.11266	8.9241	8.84396	9.35736	8.76213	8.92575	8.96024	9.01508	0.0548437	0.720864	0.986021
ENSOCUT00000033240	ENSOCUG00000004001	CNDP2	carnosine dipeptidase 2	ProteinCodingRNA	11.2543	11.0444	10.892	11.3833	11.0053	11.1339	11.0636	11.1742	0.110615	0.482272	0.986021
ENSOCUT00000033243	ENSOCUG00000012989	ADAD1	adenosine deaminase domain containing 1	ProteinCodingRNA	1.82162	3.90623	2.72661	0	2.33582	2.02102	2.81815	1.45228	-1.36587	0.178225	0.914954
ENSOCUT00000021560	ENSOCUG00000021355	RF01156	small nucleolar RNA, C/D box 123	OtherNonCodingRNA	1.82162	0.999643	1.08665	1.99327	1.59655	1.60366	1.30264	1.73116	0.428523	0.648775	0.986021
ENSOCUT00000001312	ENSOCUG00000001311	CELF1	CUGBP Elav-like family member 1	ProteinCodingRNA	10.6974	10.5701	10.5137	10.6085	10.1785	10.1636	10.5937	10.3169	-0.276837	0.105289	0.803746
ENSOCUT00000029328	ENSOCUG00000022514	SYT2	synaptotagmin 2	ProteinCodingRNA	2.13084	2.58437	4.15842	3.69216	2.82223	3.0245	2.95787	3.17963	0.221753	0.98116	0.999819
ENSOCUT00000033301	ENSOCUG00000004232	ZBTB20	zinc finger and BTB domain containing 20	ProteinCodingRNA	10.3477	11.0947	11.3225	10.5599	10.7913	10.9829	10.9216	10.778	-0.143582	0.481262	0.986021
ENSOCUT00000033302	ENSOCUG00000029281	---	---	ProteinCodingRNA	5.43451	5.45873	5.11745	5.3488	5.37447	4.72734	5.3369	5.1502	-0.186696	0.6172	0.986021
ENSOCUT00000033303	ENSOCUG00000003211	PHYKPL	5-phosphohydroxy-L-lysine phospho-lyase	ProteinCodingRNA	9.12144	8.93003	9.34054	9.11258	9.85021	9.7694	9.13067	9.57739	0.446727	0.0481176	0.635349
ENSOCUT00000033304	ENSOCUG00000029740	---	---	ProteinCodingRNA	11.4378	11.2251	11.3149	11.3491	11.1193	10.9741	11.3259	11.1475	-0.178401	0.208555	0.938709
ENSOCUT00000004762	ENSOCUG00000004754	ARFGEF3	ARFGEF family member 3	ProteinCodingRNA	9.88255	9.64134	9.4489	9.99806	8.49707	8.79608	9.6576	9.09707	-0.560526	0.289024	0.979983
ENSOCUT00000033306	ENSOCUG00000029552	RAP1B	RAP1B, member of RAS oncogene family	ProteinCodingRNA	11.2898	11.5248	11.6375	11.3219	11.7303	11.8011	11.484	11.6178	0.133742	0.422069	0.986021
ENSOCUT00000027529	ENSOCUG00000025247	RF00438	---	OtherNonCodingRNA	0	0	0	0	1.0087	0	0	0.336232	0.336232	0.80659	0.986021
ENSOCUT00000009377	ENSOCUG00000009376	MAML3	mastermind like transcriptional coactivator 3	ProteinCodingRNA	10.8312	10.7289	10.7343	11.0251	10.1947	10.0503	10.7648	10.4234	-0.341407	0.310821	0.986021
ENSOCUT00000030318	ENSOCUG00000026981	RF00004	---	OtherNonCodingRNA	7.26615	6.59921	6.12002	6.53028	7.65388	7.82874	6.66179	7.33763	0.675841	0.119325	0.831191
ENSOCUT00000001316	ENSOCUG00000001316	ESRP1	epithelial splicing regulatory protein 1	ProteinCodingRNA	12.8738	12.9267	12.9301	13.0421	13.0331	12.8892	12.9102	12.9881	0.0779418	0.332142	0.986021
ENSOCUT00000021035	ENSOCUG00000024271	PHKA1	phosphorylase b kinase regulatory subunit alpha, skeletal muscle isoform	ProteinCodingRNA	8.85805	9.31896	9.25024	9.22706	9.56614	9.37222	9.14242	9.38847	0.246053	0.184534	0.916627
ENSOCUT00000004080	ENSOCUG00000004081	GAS2L2	growth arrest specific 2 like 2	ProteinCodingRNA	5.04908	6.30308	6.70584	5.45066	6.14638	6.43703	6.01933	6.01136	-0.00797473	0.841262	0.988931
ENSOCUT00000019587	ENSOCUG00000019587	RF00272	---	OtherNonCodingRNA	2.6016	0.999643	0	2.31475	1.59655	0	1.20041	1.30377	0.103353	0.979269	0.999819
ENSOCUT00000018229	ENSOCUG00000018229	RF00100	---	OtherNonCodingRNA	0	0	0	0.99552	0	0	0	0.33184	0.33184	0.80659	0.986021
ENSOCUT00000004135	ENSOCUG00000004135	GPATCH2L	G-patch domain containing 2 like	ProteinCodingRNA	10.1201	10.0021	10.171	10.0571	10.0968	9.9763	10.0978	10.0434	-0.054353	0.564732	0.986021
ENSOCUT00000004766	ENSOCUG00000004768	MYORG	myogenesis regulating glycosidase (putative)	ProteinCodingRNA	7.70049	7.58425	7.35712	7.02452	6.75865	7.08304	7.54729	6.9554	-0.59189	0.00262859	0.162505
ENSOCUT00000005443	ENSOCUG00000005445	---	---	ProteinCodingRNA	7.70634	8.61031	9.86864	7.84281	7.51709	7.51966	8.72843	7.62652	-1.10191	0.00674632	0.272755
ENSOCUT00000009946	ENSOCUG00000009946	AP3M1	adaptor related protein complex 3 mu 1 subunit	ProteinCodingRNA	10.9087	10.717	10.8022	10.8698	10.8699	10.6463	10.8093	10.7953	-0.0139285	0.911802	0.999819
ENSOCUT00000027528	ENSOCUG00000009085	ACTR8	ARP8 actin related protein 8 homolog	ProteinCodingRNA	9.19815	9.18416	9.44193	9.22226	9.32565	9.44999	9.27475	9.33263	0.0578863	0.669358	0.986021
MSTRG.6221.1	---	---	---	Predicted_LncRNA	6.666	6.78065	6.6095	6.64933	6.83737	6.72814	6.68538	6.73828	0.0528917	0.786331	0.986021
ENSOCUT00000016964	ENSOCUG00000016959	CRYBG2	crystallin beta-gamma domain containing 2	ProteinCodingRNA	12.4654	12.3175	11.7743	12.734	11.1395	11.4899	12.1857	11.7878	-0.397927	0.538615	0.986021
ENSOCUT00000014988	ENSOCUG00000014981	ABCB1	multidrug resistance protein 1	ProteinCodingRNA	9.5121	9.59174	9.53009	0	10.4991	0	9.54464	3.49971	-6.04493	0.842109	0.989085
MSTRG.3828.2	---	---	---	Predicted_LncRNA	8.33879	0	9.08394	0.99552	1.0087	1.01405	5.80758	1.00609	-4.80149	5.80913e-07	0.00021035
ENSOCUT00000008647	ENSOCUG00000008641	PUM1	pumilio RNA binding family member 1	ProteinCodingRNA	12.4931	12.3683	12.383	12.4597	12.3443	12.2199	12.4148	12.3413	-0.0735089	0.484584	0.986021
ENSOCUT00000014987	ENSOCUG00000024057	---	ADP/ATP translocase 1	ProteinCodingRNA	10.3982	10.3291	10.3205	10.2982	9.99603	10.2794	10.3493	10.1912	-0.158048	0.207557	0.938709
ENSOCUT00000014981	ENSOCUG00000014976	ERCC4	ERCC excision repair 4, endonuclease catalytic subunit	ProteinCodingRNA	8.80725	8.86038	8.90948	8.99386	8.99172	9.08048	8.85904	9.02202	0.162983	0.111187	0.811516
ENSOCUT00000014980	ENSOCUG00000014987	---	---	OtherNonCodingRNA	9.90815	9.53651	9.717	9.97545	9.34374	9.40296	9.72055	9.57405	-0.1465	0.568619	0.986021
ENSOCUT00000014982	ENSOCUG00000014984	POLR2C	RNA polymerase II subunit C	ProteinCodingRNA	10.5409	10.5041	10.5225	10.5722	10.3245	10.2078	10.5225	10.3682	-0.154295	0.248502	0.96761
ENSOCUT00000011357	ENSOCUG00000011362	RRAS2	RAS related 2	ProteinCodingRNA	9.04734	9.09469	8.93951	9.21021	9.11534	8.96454	9.02718	9.0967	0.0695172	0.562192	0.986021
ENSOCUT00000011354	ENSOCUG00000011358	CAB39	calcium binding protein 39	ProteinCodingRNA	12.4236	12.3031	12.224	12.3874	12.1725	12.0741	12.3169	12.2113	-0.105586	0.415	0.986021
ENSOCUT00000011353	ENSOCUG00000011355	SCPEP1	serine carboxypeptidase 1	ProteinCodingRNA	11.3634	11.4946	11.3219	11.3601	10.8247	11.2965	11.3933	11.1604	-0.232882	0.210299	0.939884
ENSOCUT00000011352	ENSOCUG00000011350	SPON1	spondin 1	ProteinCodingRNA	10.7842	10.4689	10.6859	10.9945	10.7099	10.8377	10.6464	10.8474	0.201029	0.145717	0.880005
ENSOCUT00000011351	ENSOCUG00000011353	INHA	inhibin alpha chain precursor	ProteinCodingRNA	4.67259	4.7542	4.8627	4.84932	4.87473	4.61177	4.76316	4.7786	0.0154401	0.948035	0.999819
MSTRG.4720.1	---	---	---	Predicted_LncRNA	8.09757	7.91218	7.88873	7.9218	7.50106	7.51966	7.96616	7.64751	-0.318653	0.104541	0.803746
ENSOCUT00000003325	ENSOCUG00000003322	EGFLAM	EGF like, fibronectin type III and laminin G domains	ProteinCodingRNA	9.75434	8.90016	8.49881	9.68627	7.98305	8.1416	9.0511	8.60364	-0.44746	0.530193	0.986021
ENSOCUT00000003327	ENSOCUG00000003328	CNNM4	cyclin and CBS domain divalent metal cation transport mediator 4	ProteinCodingRNA	9.97387	9.92707	9.54319	9.59281	10.0272	10.2153	9.81471	9.94508	0.130376	0.513133	0.986021
ENSOCUT00000003321	ENSOCUG00000003325	SOWAHC	sosondowah ankyrin repeat domain family member C	ProteinCodingRNA	8.37596	8.60292	8.90611	8.4089	8.07256	8.49549	8.62833	8.32565	-0.302677	0.145274	0.879123
MSTRG.5400.1	---	---	---	Predicted_LncRNA	7.47241	7.32122	7.61869	7.34863	7.88763	7.87959	7.47077	7.70528	0.234513	0.259123	0.970468
ENSOCUT00000011359	ENSOCUG00000011364	ITM2C	integral membrane protein 2C	ProteinCodingRNA	7.93274	8.03271	8.82977	7.73926	7.21689	9.28766	8.26508	8.08127	-0.183804	0.942445	0.999819
ENSOCUT00000003633	ENSOCUG00000003634	PCBP1	Poly(rC)-binding protein 1	ProteinCodingRNA	13.0651	12.9317	12.9258	13.1069	12.8792	12.9161	12.9742	12.9674	-0.00678372	0.964256	0.999819
ENSOCUT00000033022	ENSOCUG00000029055	---	---	OtherNonCodingRNA	1.42753	0	0	0	1.0087	1.01405	0.475843	0.674248	0.198405	0.942499	0.999819
ENSOCUT00000014318	ENSOCUG00000014319	---	---	ProteinCodingRNA	8.05695	8.1792	8.06859	8.40044	8.06712	7.95859	8.10158	8.14205	0.0404717	0.765003	0.986021
ENSOCUT00000003637	ENSOCUG00000003639	CREB5	cAMP responsive element binding protein 5	ProteinCodingRNA	9.97508	9.61767	9.11935	10.2005	8.10474	7.34972	9.5707	8.55165	-1.01905	0.524678	0.986021
ENSOCUT00000003636	ENSOCUG00000003638	GABRB3	gamma-aminobutyric acid type A receptor beta3 subunit	ProteinCodingRNA	4.22832	4.39164	4.48235	0	4.97098	4.41896	4.36743	3.12998	-1.23745	0.842286	0.989085
MSTRG.6168.1	---	---	---	Predicted_LncRNA	10.1419	9.94034	10.1004	10.2029	10.1363	9.79942	10.0609	10.0462	-0.0146837	0.963704	0.999819
ENSOCUT00000031582	ENSOCUG00000026303	---	---	ProteinCodingRNA	9.88771	10.1916	10.8247	9.88888	10.9302	10.7362	10.3013	10.5184	0.217089	0.50074	0.986021
ENSOCUT00000003639	ENSOCUG00000003637	CGNL1	cingulin like 1	ProteinCodingRNA	11.4444	12.1186	12.4302	11.991	12.2283	12.0521	11.9977	12.0905	0.0927767	0.873768	0.993072
ENSOCUT00000003638	ENSOCUG00000003636	TGM2	transglutaminase 2	ProteinCodingRNA	9.3214	9.84321	9.98199	8.26252	10.2688	10.2103	9.71553	9.58055	-0.134981	0.858834	0.991171
MSTRG.15806.1	---	---	---	Predicted_LncRNA	12.729	12.3873	11.9603	12.971	11.8827	11.9513	12.3589	12.2683	-0.0905628	0.923275	0.999819
ENSOCUT00000022038	ENSOCUG00000012874	---	---	ProteinCodingRNA	11.8278	11.7361	11.2551	11.9579	11.3505	11.3017	11.6063	11.5367	-0.0696173	0.811065	0.986021
ENSOCUT00000022039	ENSOCUG00000022950	---	---	ProteinCodingRNA	7.6098	7.47502	7.68322	7.67757	8.00596	7.91049	7.58935	7.86467	0.275325	0.098059	0.793101
MSTRG.3756.2	---	---	---	Predicted_LncRNA	10.7386	9.91218	8.97539	10.6204	8.1721	7.33157	9.87539	8.70802	-1.16737	0.526683	0.986021
ENSOCUT00000025029	ENSOCUG00000023343	PCSK9	proprotein convertase subtilisin/kexin type 9	ProteinCodingRNA	1.42753	1.58449	0	1.57899	3.18535	4.1138	1.00401	2.95938	1.95537	0.0288159	0.52475
ENSOCUT00000025026	ENSOCUG00000026070	---	---	OtherNonCodingRNA	9.04965	9.71525	9.7884	9.63309	9.36161	9.41594	9.51777	9.47021	-0.0475548	0.735053	0.986021
ENSOCUT00000022036	ENSOCUG00000022732	---	---	ProteinCodingRNA	3.94146	4.16925	3.6133	4.57636	5.26481	5.15645	3.908	4.99921	1.09121	0.00881456	0.314394
ENSOCUT00000022037	ENSOCUG00000006320	SMARCA2	SWI/SNF related, matrix associated, actin dependent regulator of chromatin, subfamily a, member 2	ProteinCodingRNA	12.8029	13.0866	13.3627	12.6878	13.1361	13.1899	13.084	13.0046	-0.0794468	0.705096	0.986021
ENSOCUT00000022030	ENSOCUG00000021209	---	Metallothionein-2D	ProteinCodingRNA	10.6789	10.2112	9.79572	10.3231	9.48288	9.23004	10.2286	9.67866	-0.549928	0.136821	0.867214
ENSOCUT00000022031	ENSOCUG00000026859	HNRNPA2B1	heterogeneous nuclear ribonucleoprotein A2/B1	ProteinCodingRNA	11.015	11.0084	10.8442	11.1222	11.0827	10.6986	10.9559	10.9679	0.011981	0.884887	0.995091
ENSOCUT00000022032	ENSOCUG00000021664	RF00026	---	OtherNonCodingRNA	0	2.99938	1.69938	2.57749	3.18535	2.34434	1.56625	2.70239	1.13614	0.454319	0.986021
ENSOCUT00000012918	ENSOCUG00000012915	SIK2	salt inducible kinase 2	ProteinCodingRNA	11.7828	11.7888	11.7734	11.6011	11.88	11.7795	11.7817	11.7535	-0.0281229	0.818563	0.986021
ENSOCUT00000012668	ENSOCUG00000012669	GORASP2	golgi reassembly stacking protein 2	ProteinCodingRNA	11.4617	11.3895	11.3294	11.4469	11.3364	11.4384	11.3936	11.4072	0.0136862	0.872791	0.993072
ENSOCUT00000026239	ENSOCUG00000027757	CMTM3	CKLF like MARVEL transmembrane domain containing 3	ProteinCodingRNA	7.93772	7.90618	8.16777	7.77243	7.23639	7.47902	8.00389	7.49594	-0.507945	0.0157766	0.400543
ENSOCUT00000012910	ENSOCUG00000012914	---	---	OtherNonCodingRNA	10.0723	9.87734	9.65801	10.227	9.6791	9.80107	9.8692	9.9024	0.0332007	0.832888	0.98771
ENSOCUT00000026237	ENSOCUG00000001344	---	---	ProteinCodingRNA	2.6016	2.99938	3.14838	1.99327	0	2.34434	2.91645	1.44587	-1.47058	0.14751	0.881555
ENSOCUT00000012912	ENSOCUG00000012909	ZP2	zona pellucida glycoprotein 2	ProteinCodingRNA	5.04908	3.80669	4.06464	3.99159	4.92366	4.61177	4.3068	4.509	0.2022	0.798548	0.986021
ENSOCUT00000033108	ENSOCUG00000029083	---	---	OtherNonCodingRNA	2.13084	2.32136	2.72661	2.31475	1.59655	1.60366	2.39294	1.83832	-0.554616	0.477167	0.986021
MSTRG.4351.1	---	---	---	Predicted_LncRNA	11.3671	12.3358	12.8326	12.0354	12.1134	12.1733	12.1785	12.1074	-0.0711348	0.57699	0.986021
ENSOCUT00000012915	ENSOCUG00000012918	SYNPR	synaptoporin	ProteinCodingRNA	3.77336	1.58449	0	1.99327	2.59943	2.02102	1.78595	2.20457	0.418627	0.752729	0.986021
ENSOCUT00000026230	ENSOCUG00000026480	---	---	ProteinCodingRNA	6.11768	4.9062	5.02088	5.12057	4.77159	5.07152	5.34825	4.98789	-0.360362	0.300864	0.983233
ENSOCUT00000026231	ENSOCUG00000015713	TMEM132A	transmembrane protein 132A	ProteinCodingRNA	10.3635	10.2684	10.2262	10.3375	9.16451	9.93482	10.286	9.81229	-0.473745	0.169644	0.909815
MSTRG.13764.1	---	---	---	Predicted_LncRNA	0	0	2.1281	2.31475	5.1043	1.60366	0.709366	3.00757	2.29821	0.0348135	0.560015
MSTRG.10644.2	---	---	---	Predicted_LncRNA	7.89739	7.95349	7.87499	8.24372	7.65388	7.39412	7.90862	7.76391	-0.144716	0.700269	0.986021
ENSOCUT00000010441	ENSOCUG00000011067	ITIH1	inter-alpha-trypsin inhibitor heavy chain H1 precursor	ProteinCodingRNA	1.82162	0	0	1.99327	0	0	0.607208	0.664425	0.0572172	0.951807	0.999819
MSTRG.7230.1	---	---	---	Predicted_LncRNA	6.97785	6.12858	7.25468	6.16108	7.19713	7.70025	6.78704	7.01949	0.23245	0.539457	0.986021
ENSOCUT00000033024	ENSOCUG00000029069	NCBP2-AS2	NCBP2 antisense RNA 2 (head to head)	ProteinCodingRNA	4.46749	4.08679	4.40793	4.51498	4.66051	4.88499	4.32074	4.68682	0.366089	0.339597	0.986021
ENSOCUT00000020766	ENSOCUG00000020766	RF00001	---	OtherNonCodingRNA	0	0.999643	0	0	0	0	0.333214	0	-0.333214	0.820752	0.986021
ENSOCUT00000010443	ENSOCUG00000010439	---	---	ProteinCodingRNA	0	3.45878	1.69938	0	2.01302	0	1.71939	0.671008	-1.04838	0.380076	0.986021
[truncated: 15,746 more rows]
